# Supplementary material for: Cryo-EM Structures of MDA5-dsRNA Filaments at Different Stages of ATP Hydrolysis
Source: PubMed Central journal article supplement (PMC6310684; doi:10.1016/j.molcel.2018.10.012), 2018-12-20
Supplement: mmc2.pdf [file mmc2.pdf]

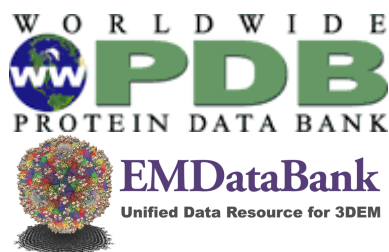

# Full wwPDB/EMDataBank EM Map/Model Validation Report ⓘ

Apr 3, 2018 – 09:41 AM BST

PDB ID : 6G19  
EMDB ID: : EMD-4338  
Title : CryoEM structure of the MDA5-dsRNA filament with 74-degree helical twist  
Deposited on : 2018-03-20  
Resolution : 3.68 Å (reported)

This is a Full wwPDB/EMDataBank EM Map/Model Validation Report.

This report is produced by the wwPDB biocuration pipeline after annotation of the structure.

We welcome your comments at [validation@mail.wwpdb.org](mailto:validation@mail.wwpdb.org)

A user guide is available at

<https://www.wwpdb.org/validation/2017/EMValidationReportHelp>

with specific help available everywhere you see the ⓘ symbol.

---

MolProbity : 4.02b-467  
Mogul : 1.7.3 (157068), CSD as539be (2018)  
Percentile statistics : 20171227.v01 (using entries in the PDB archive December 27th 2017)  
Ideal geometry (proteins) : Engh & Huber (2001)  
Ideal geometry (DNA, RNA) : Parkinson et. al. (1996)  
Validation Pipeline (wwPDB-VP) : rb-20031021

# 1 Overall quality at a glance i

The following experimental techniques were used to determine the structure:  
*ELECTRON MICROSCOPY*

The reported resolution of this entry is 3.68 Å.

Percentile scores (ranging between 0-100) for global validation metrics of the entry are shown in the following graphic. The table shows the number of entries on which the scores are based.

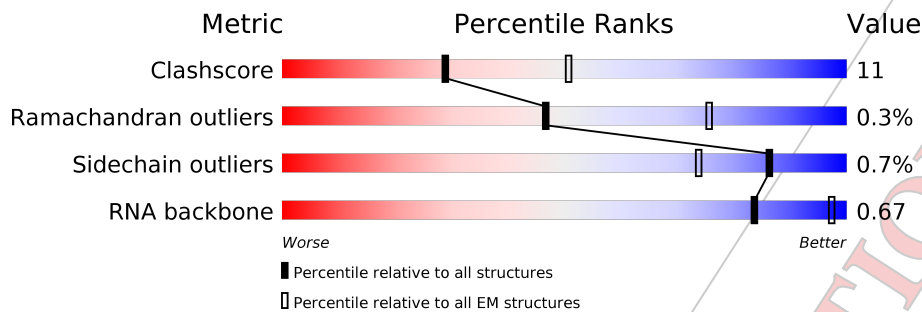

| Metric                | Whole archive (#Entries) | EM structures (#Entries) |
|-----------------------|--------------------------|--------------------------|
| Clashscore            | 136327                   | 1886                     |
| Ramachandran outliers | 132723                   | 1663                     |
| Sidechain outliers    | 132532                   | 1531                     |
| RNA backbone          | 3747                     | 458                      |

The table below summarises the geometric issues observed across the polymeric chains. The red, orange, yellow and green segments on the bar indicate the fraction of residues that contain outliers for  $\geq 3$ , 2, 1 and 0 types of geometric quality criteria. A grey segment represents the fraction of residues that are not modelled. The numeric value for each fraction is indicated below the corresponding segment, with a dot representing fractions  $\leq 5\%$

| Mol | Chain | Length | Quality of chain |
|-----|-------|--------|------------------|
| 1   | A     | 696    | <br>79% 18% ..   |
| 2   | X     | 14     | <br>7% 93%       |
| 3   | Y     | 14     | <br>100%         |

## 2 Entry composition i

There are 5 unique types of molecules in this entry. The entry contains 10503 atoms, of which 4402 are hydrogens and 0 are deuteriums.

In the tables below, the AltConf column contains the number of residues with at least one atom in alternate conformation and the Trace column contains the number of residues modelled with at most 2 atoms.

- Molecule 1 is a protein called Interferon-induced helicase C domain-containing protein 1.

| Mol | Chain | Residues | Atoms |      |      |     |      | AltConf | Trace |   |
|-----|-------|----------|-------|------|------|-----|------|---------|-------|---|
|     |       |          | Total | C    | H    | N   | O    |         |       | S |
| 1   | A     | 682      | 9874  | 3468 | 4402 | 950 | 1019 | 35      | 0     | 0 |

There are 18 discrepancies between the modelled and reference sequences:

| Chain | Residue | Modelled | Actual | Comment  | Reference  |
|-------|---------|----------|--------|----------|------------|
| A     | ?       | -        | ASP    | deletion | UNP Q8R5F7 |
| A     | ?       | -        | LYS    | deletion | UNP Q8R5F7 |
| A     | ?       | -        | SER    | deletion | UNP Q8R5F7 |
| A     | ?       | -        | ASP    | deletion | UNP Q8R5F7 |
| A     | ?       | -        | ASP    | deletion | UNP Q8R5F7 |
| A     | ?       | -        | GLU    | deletion | UNP Q8R5F7 |
| A     | ?       | -        | ALA    | deletion | UNP Q8R5F7 |
| A     | ?       | -        | SER    | deletion | UNP Q8R5F7 |
| A     | ?       | -        | SER    | deletion | UNP Q8R5F7 |
| A     | ?       | -        | CYS    | deletion | UNP Q8R5F7 |
| A     | ?       | -        | ASN    | deletion | UNP Q8R5F7 |
| A     | ?       | -        | ASP    | deletion | UNP Q8R5F7 |
| A     | ?       | -        | GLN    | deletion | UNP Q8R5F7 |
| A     | ?       | -        | LEU    | deletion | UNP Q8R5F7 |
| A     | ?       | -        | LYS    | deletion | UNP Q8R5F7 |
| A     | ?       | -        | GLY    | deletion | UNP Q8R5F7 |
| A     | ?       | -        | ASP    | deletion | UNP Q8R5F7 |
| A     | ?       | -        | VAL    | deletion | UNP Q8R5F7 |

- Molecule 2 is a RNA chain called RNA (5'-R(P\*CP\*AP\*AP\*GP\*CP\*CP\*GP\*AP\*GP\*GP\*AP\*GP\*AP\*G)-3').

| Mol | Chain | Residues | Atoms |     |    |    |    | AltConf | Trace |
|-----|-------|----------|-------|-----|----|----|----|---------|-------|
|     |       |          | Total | C   | N  | O  | P  |         |       |
| 2   | X     | 14       | 308   | 137 | 64 | 93 | 14 | 0       | 0     |

- Molecule 3 is a RNA chain called RNA (5'-R(P\*CP\*UP\*CP\*UP\*CP\*CP\*UP\*CP\*GP\*GP

\*CP\*UP\*UP\*G)-3').

| Mol | Chain | Residues | Atoms |     |    |     |    | AltConf | Trace |
|-----|-------|----------|-------|-----|----|-----|----|---------|-------|
|     |       |          | Total | C   | N  | O   | P  |         |       |
| 3   | Y     | 14       | 289   | 129 | 43 | 103 | 14 | 0       | 0     |

- Molecule 4 is ZINC ION (three-letter code: ZN) (formula: Zn).

| Mol | Chain | Residues | Atoms |    | AltConf |
|-----|-------|----------|-------|----|---------|
|     |       |          | Total | Zn |         |
| 4   | A     | 1        | 1     | 1  | 0       |

- Molecule 5 is PHOSPHOAMINOPHOSPHONIC ACID-ADENYLATE ESTER (three-letter code: ANP) (formula: C<sub>10</sub>H<sub>17</sub>N<sub>6</sub>O<sub>12</sub>P<sub>3</sub>).

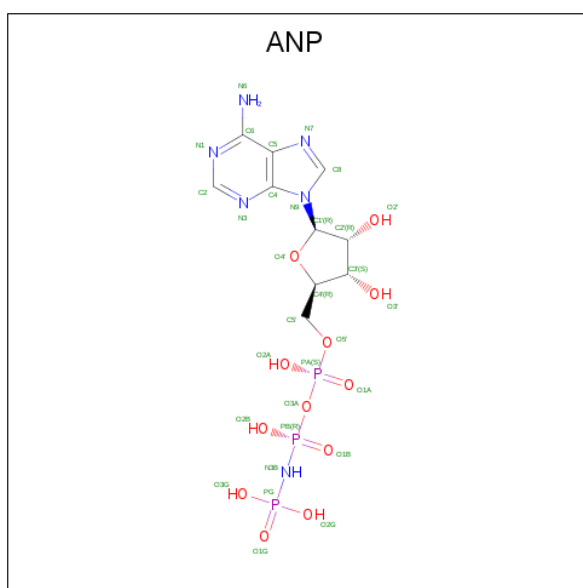

| Mol | Chain | Residues | Atoms |    |   |    |   | AltConf |
|-----|-------|----------|-------|----|---|----|---|---------|
|     |       |          | Total | C  | N | O  | P |         |
| 5   | A     | 1        | 31    | 10 | 6 | 12 | 3 | 0       |

### 3 Residue-property plots [i](#)

These plots are drawn for all protein, RNA and DNA chains in the entry. The first graphic for a chain summarises the proportions of the various outlier classes displayed in the second graphic. The second graphic shows the sequence view annotated by issues in geometry. Residues are color-coded according to the number of geometric quality criteria for which they contain at least one outlier: green = 0, yellow = 1, orange = 2 and red = 3 or more. Stretches of two or more consecutive residues without any outlier are shown as a green connector. Residues present in the sample, but not in the model, are shown in grey.

- Molecule 1: Interferon-induced helicase C domain-containing protein 1

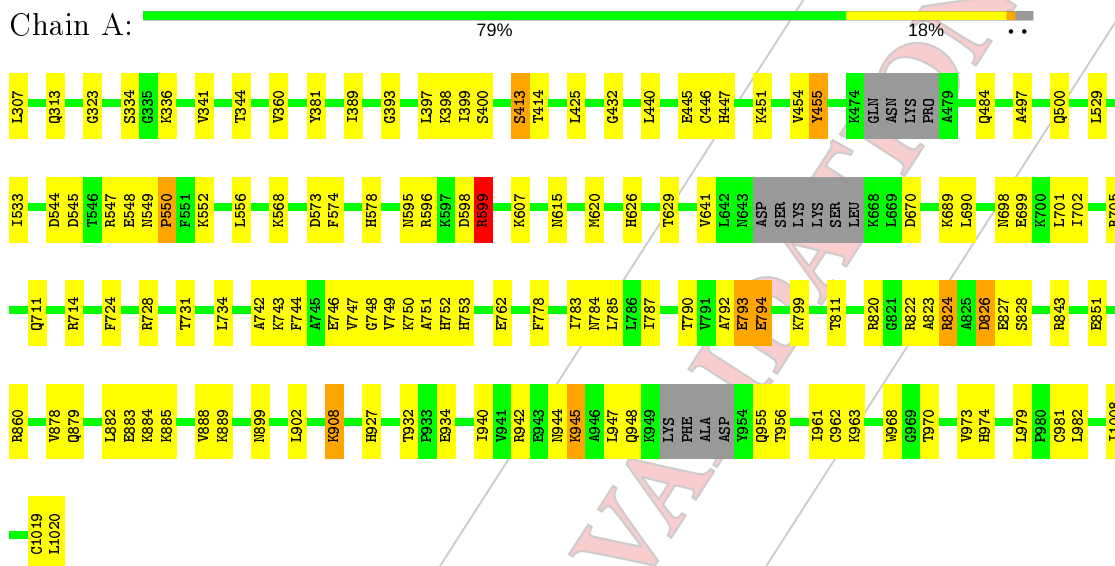

- Molecule 2: RNA (5'-R(P\*CP\*AP\*AP\*GP\*CP\*CP\*GP\*AP\*GP\*GP\*AP\*GP\*AP\*G)-3')

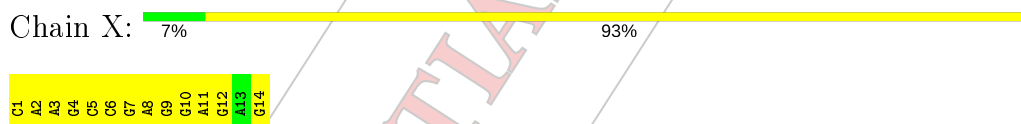

- Molecule 3: RNA (5'-R(P\*CP\*UP\*CP\*UP\*CP\*CP\*UP\*CP\*GP\*GP\*CP\*UP\*UP\*G)-3')

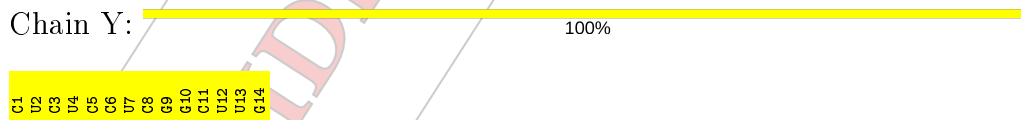

## 4 Experimental information i

| Property                           | Value                                                 | Source    |
|------------------------------------|-------------------------------------------------------|-----------|
| Reconstruction method              | HELICAL                                               | Depositor |
| Imposed symmetry                   | HELICAL, twist=74.3022°, rise=42.8438 Å, axial sym=C1 | Depositor |
| Number of segments used            | 33138                                                 | Depositor |
| Resolution determination method    | FSC 0.143 CUT-OFF                                     | Depositor |
| CTF correction method              | PHASE FLIPPING AND AMPLITUDE CORRECTION               | Depositor |
| Microscope                         | FEI TITAN KRIOS                                       | Depositor |
| Voltage (kV)                       | 300                                                   | Depositor |
| Electron dose ( $e^-/\text{Å}^2$ ) | 29.85                                                 | Depositor |
| Minimum defocus (nm)               | 1800                                                  | Depositor |
| Maximum defocus (nm)               | 2700                                                  | Depositor |
| Magnification                      | 75000                                                 | Depositor |
| Image detector                     | FEI FALCON III (4k x 4k)                              | Depositor |

CONFIDENTIAL

VALIDATION REPORT

## 5 Model quality i

### 5.1 Standard geometry i

Bond lengths and bond angles in the following residue types are not validated in this section: ZN, ANP

The Z score for a bond length (or angle) is the number of standard deviations the observed value is removed from the expected value. A bond length (or angle) with  $|Z| > 5$  is considered an outlier worth inspection. RMSZ is the root-mean-square of all Z scores of the bond lengths (or angles).

| Mol | Chain | Bond lengths |               | Bond angles |                |
|-----|-------|--------------|---------------|-------------|----------------|
|     |       | RMSZ         | # Z  > 2      | RMSZ        | # Z  > 2       |
| 1   | A     | 0.57         | 3/5558 (0.1%) | 0.69        | 9/7469 (0.1%)  |
| 2   | X     | 0.77         | 0/346         | 0.88        | 0/539          |
| 3   | Y     | 0.79         | 0/319         | 1.01        | 1/493 (0.2%)   |
| All | All   | 0.60         | 3/6223 (0.0%) | 0.73        | 10/8501 (0.1%) |

Chiral center outliers are detected by calculating the chiral volume of a chiral center and verifying if the center is modelled as a planar moiety or with the opposite hand. A planarity outlier is detected by checking planarity of atoms in a peptide group, atoms in a mainchain group or atoms of a sidechain that are expected to be planar.

| Mol | Chain | #Chirality outliers | #Planarity outliers |
|-----|-------|---------------------|---------------------|
| 1   | A     | 0                   | 5                   |

All (3) bond length outliers are listed below:

| Mol | Chain | Res | Type | Atoms   | Z     | Observed(Å) | Ideal(Å) |
|-----|-------|-----|------|---------|-------|-------------|----------|
| 1   | A     | 455 | TYR  | CD2-CE2 | -6.62 | 1.29        | 1.39     |
| 1   | A     | 455 | TYR  | CB-CG   | -5.17 | 1.43        | 1.51     |
| 1   | A     | 455 | TYR  | CD1-CE1 | -5.12 | 1.31        | 1.39     |

All (10) bond angle outliers are listed below:

| Mol | Chain | Res | Type | Atoms     | Z      | Observed(°) | Ideal(°) |
|-----|-------|-----|------|-----------|--------|-------------|----------|
| 1   | A     | 599 | ARG  | NE-CZ-NH2 | -13.92 | 113.34      | 120.30   |
| 1   | A     | 599 | ARG  | NE-CZ-NH1 | 9.87   | 125.23      | 120.30   |
| 1   | A     | 824 | ARG  | NE-CZ-NH2 | -8.71  | 115.94      | 120.30   |
| 1   | A     | 497 | ALA  | C-N-CA    | 8.60   | 143.19      | 121.70   |
| 1   | A     | 794 | GLU  | C-N-CA    | 7.89   | 138.87      | 122.30   |
| 1   | A     | 793 | GLU  | C-N-CA    | 6.26   | 137.35      | 121.70   |
| 1   | A     | 599 | ARG  | CG-CD-NE  | -5.62  | 100.00      | 111.80   |

Continued on next page...

Continued from previous page...

| Mol | Chain | Res | Type | Atoms    | Z     | Observed(°) | Ideal(°) |
|-----|-------|-----|------|----------|-------|-------------|----------|
| 3   | Y     | 12  | U    | C5-C6-N1 | -5.34 | 120.03      | 122.70   |
| 1   | A     | 451 | LYS  | C-N-CA   | 5.26  | 134.86      | 121.70   |
| 1   | A     | 908 | LYS  | CD-CE-NZ | 5.19  | 123.63      | 111.70   |

There are no chirality outliers.

All (5) planarity outliers are listed below:

| Mol | Chain | Res | Type | Group   |
|-----|-------|-----|------|---------|
| 1   | A     | 413 | SER  | Peptide |
| 1   | A     | 454 | VAL  | Peptide |
| 1   | A     | 548 | GLU  | Peptide |
| 1   | A     | 550 | PRO  | Peptide |
| 1   | A     | 793 | GLU  | Peptide |

## 5.2 Too-close contacts [i](#)

In the following table, the Non-H and H(model) columns list the number of non-hydrogen atoms and hydrogen atoms in the chain respectively. The H(added) column lists the number of hydrogen atoms added and optimized by MolProbity. The Clashes column lists the number of clashes within the asymmetric unit, whereas Symm-Clashes lists symmetry related clashes.

| Mol | Chain | Non-H | H(model) | H(added) | Clashes | Symm-Clashes |
|-----|-------|-------|----------|----------|---------|--------------|
| 1   | A     | 5472  | 4402     | 5596     | 103     | 0            |
| 2   | X     | 308   | 0        | 155      | 22      | 0            |
| 3   | Y     | 289   | 0        | 150      | 19      | 0            |
| 4   | A     | 1     | 0        | 0        | 0       | 0            |
| 5   | A     | 31    | 0        | 13       | 2       | 0            |
| All | All   | 6101  | 4402     | 5914     | 135     | 0            |

The all-atom clashscore is defined as the number of clashes found per 1000 atoms (including hydrogen atoms). The all-atom clashscore for this structure is 11.

All (135) close contacts within the same asymmetric unit are listed below, sorted by their clash magnitude.

| Atom-1           | Atom-2          | Interatomic distance (Å) | Clash overlap (Å) |
|------------------|-----------------|--------------------------|-------------------|
| 1:A:641:VAL:HG11 | 1:A:963:LYS:O   | 1.74                     | 0.88              |
| 1:A:823:ALA:HB1  | 1:A:828:SER:HB2 | 1.67                     | 0.74              |
| 1:A:843:ARG:CZ   | 2:X:12:G:H5'    | 2.19                     | 0.72              |
| 1:A:547:ARG:NH2  | 1:A:699:GLU:OE2 | 2.23                     | 0.72              |

Continued on next page...



Continued from previous page...

| Atom-1           | Atom-2           | Interatomic distance (Å) | Clash overlap (Å) |
|------------------|------------------|--------------------------|-------------------|
| 1:A:944:ASN:H    | 1:A:955:GLN:HG2  | 1.54                     | 0.72              |
| 1:A:932:THR:OG1  | 1:A:934:GLU:OE1  | 2.10                     | 0.69              |
| 1:A:701:LEU:O    | 1:A:705:ARG:HG3  | 1.95                     | 0.66              |
| 2:X:1:C:H2'      | 2:X:2:A:H8       | 1.61                     | 0.66              |
| 1:A:336:LYS:NZ   | 5:A:1102:ANP:O3G | 2.30                     | 0.65              |
| 1:A:341:VAL:O    | 1:A:344:THR:OG1  | 2.15                     | 0.64              |
| 1:A:389:ILE:HD11 | 1:A:397:LEU:HD13 | 1.80                     | 0.64              |
| 1:A:413:SER:OG   | 1:A:414:THR:O    | 2.09                     | 0.64              |
| 1:A:724:PHE:HE1  | 1:A:792:ALA:HB3  | 1.62                     | 0.64              |
| 1:A:744:PHE:O    | 1:A:749:VAL:HB   | 1.98                     | 0.63              |
| 1:A:974:HIS:HB3  | 1:A:979:LEU:HD21 | 1.81                     | 0.63              |
| 1:A:607:LYS:NZ   | 1:A:762:GLU:OE2  | 2.33                     | 0.62              |
| 1:A:792:ALA:O    | 1:A:822:ARG:NH2  | 2.32                     | 0.61              |
| 1:A:970:THR:HG21 | 2:X:3:A:H4'      | 1.82                     | 0.61              |
| 1:A:824:ARG:N    | 1:A:824:ARG:HD2  | 2.16                     | 0.61              |
| 1:A:981:CYS:SG   | 1:A:982:LEU:N    | 2.74                     | 0.61              |
| 1:A:962:CYS:SG   | 1:A:963:LYS:N    | 2.73                     | 0.61              |
| 3:Y:2:U:H2'      | 3:Y:3:C:C6       | 2.36                     | 0.61              |
| 1:A:549:ASN:HB2  | 1:A:550:PRO:HD3  | 1.81                     | 0.61              |
| 1:A:843:ARG:NH2  | 2:X:11:A:O3'     | 2.33                     | 0.61              |
| 1:A:899:ASN:HB3  | 1:A:902:LEU:HD13 | 1.82                     | 0.60              |
| 1:A:945:LYS:O    | 1:A:948:GLN:HG3  | 2.03                     | 0.58              |
| 1:A:749:VAL:HG13 | 1:A:785:LEU:HD22 | 1.86                     | 0.58              |
| 1:A:885:LYS:O    | 1:A:889:LYS:HG2  | 2.03                     | 0.58              |
| 3:Y:1:C:H2'      | 3:Y:2:U:H6       | 1.68                     | 0.58              |
| 1:A:945:LYS:H    | 1:A:945:LYS:HD3  | 1.69                     | 0.57              |
| 1:A:947:LEU:HD13 | 1:A:956:THR:H    | 1.70                     | 0.57              |
| 1:A:899:ASN:HB2  | 1:A:1008:ILE:CG2 | 2.33                     | 0.57              |
| 1:A:1019:CYS:SG  | 1:A:1020:LEU:N   | 2.75                     | 0.57              |
| 3:Y:1:C:H2'      | 3:Y:2:U:C6       | 2.38                     | 0.57              |
| 1:A:751:ALA:HB2  | 1:A:785:LEU:HD21 | 1.86                     | 0.57              |
| 1:A:724:PHE:CE1  | 1:A:792:ALA:HB3  | 2.40                     | 0.57              |
| 1:A:927:HIS:HE1  | 2:X:4:G:H1'      | 1.70                     | 0.57              |
| 1:A:945:LYS:HA   | 1:A:948:GLN:HG3  | 1.87                     | 0.57              |
| 2:X:11:A:H2'     | 2:X:12:G:C8      | 2.40                     | 0.56              |
| 3:Y:7:U:O2'      | 3:Y:8:C:H5'      | 2.05                     | 0.56              |
| 2:X:11:A:H2'     | 2:X:12:G:H8      | 1.70                     | 0.56              |
| 1:A:979:LEU:HD23 | 1:A:979:LEU:H    | 1.71                     | 0.55              |
| 1:A:445:GLU:OE1  | 1:A:447:HIS:NE2  | 2.40                     | 0.55              |
| 1:A:313:GLN:NE2  | 1:A:334:SER:O    | 2.38                     | 0.55              |
| 1:A:927:HIS:CE1  | 2:X:4:G:H1'      | 2.41                     | 0.55              |

Continued on next page...

Continued from previous page...

| Atom-1           | Atom-2            | Interatomic distance (Å) | Clash overlap (Å) |
|------------------|-------------------|--------------------------|-------------------|
| 1:A:752:HIS:ND1  | 1:A:753:HIS:O     | 2.39                     | 0.55              |
| 1:A:752:HIS:HB2  | 1:A:783:ILE:HG12  | 1.89                     | 0.54              |
| 1:A:641:VAL:HA   | 1:A:940:ILE:CD1   | 2.37                     | 0.54              |
| 5:A:1102:ANP:N3B | 5:A:1102:ANP:O1A  | 2.38                     | 0.54              |
| 1:A:307:LEU:HB3  | 1:A:381:TYR:CD2   | 2.42                     | 0.54              |
| 1:A:578:HIS:ND1  | 2:X:14:G:H4'      | 2.23                     | 0.53              |
| 1:A:547:ARG:HB3  | 1:A:549:ASN:OD1   | 2.08                     | 0.53              |
| 1:A:568:LYS:HE2  | 1:A:598:ASP:OD1   | 2.08                     | 0.53              |
| 1:A:573:ASP:OD1  | 1:A:574:PHE:N     | 2.40                     | 0.53              |
| 1:A:778:PHE:CE2  | 1:A:799:LYS:HB3   | 2.44                     | 0.53              |
| 1:A:552:LYS:HG2  | 1:A:556:LEU:CD1   | 2.39                     | 0.52              |
| 1:A:728:ARG:O    | 1:A:731:THR:OG1   | 2.19                     | 0.52              |
| 2:X:1:C:H2'      | 2:X:2:A:C8        | 2.43                     | 0.52              |
| 1:A:945:LYS:HA   | 1:A:948:GLN:CG    | 2.39                     | 0.52              |
| 1:A:822:ARG:O    | 1:A:824:ARG:HD2   | 2.10                     | 0.52              |
| 1:A:899:ASN:HB2  | 1:A:1008:ILE:HG22 | 1.92                     | 0.51              |
| 1:A:731:THR:HG22 | 1:A:787:ILE:HG22  | 1.92                     | 0.51              |
| 1:A:711:GLN:OE1  | 1:A:714:ARG:NH2   | 2.43                     | 0.50              |
| 3:Y:2:U:H2'      | 3:Y:3:C:H6        | 1.75                     | 0.50              |
| 1:A:790:THR:HG1  | 3:Y:6:C:HO2'      | 1.60                     | 0.50              |
| 2:X:9:G:O2'      | 2:X:10:G:H5'      | 2.12                     | 0.49              |
| 2:X:7:G:O2'      | 2:X:8:A:H5'       | 2.12                     | 0.49              |
| 1:A:596:ARG:NH1  | 1:A:670:ASP:OD2   | 2.43                     | 0.49              |
| 1:A:974:HIS:CB   | 1:A:979:LEU:HD21  | 2.43                     | 0.49              |
| 1:A:545:ASP:HB3  | 1:A:699:GLU:CD    | 2.33                     | 0.48              |
| 3:Y:13:U:H2'     | 3:Y:14:G:O4'      | 2.14                     | 0.48              |
| 1:A:778:PHE:HE2  | 1:A:799:LYS:HB3   | 1.80                     | 0.47              |
| 3:Y:5:C:O2'      | 3:Y:6:C:H5'       | 2.14                     | 0.47              |
| 2:X:5:C:O2'      | 2:X:6:C:H5'       | 2.15                     | 0.47              |
| 1:A:811:THR:O    | 2:X:11:A:H4'      | 2.15                     | 0.47              |
| 1:A:743:LYS:O    | 1:A:747:VAL:HG23  | 2.13                     | 0.47              |
| 1:A:824:ARG:H    | 1:A:824:ARG:HD2   | 1.81                     | 0.46              |
| 1:A:962:CYS:HB2  | 1:A:968:TRP:CE2   | 2.51                     | 0.46              |
| 1:A:393:GLY:HA2  | 1:A:398:LYS:HD3   | 1.98                     | 0.46              |
| 1:A:820:ARG:NH2  | 1:A:851:GLU:OE2   | 2.48                     | 0.46              |
| 1:A:878:VAL:O    | 1:A:882:LEU:HD13  | 2.15                     | 0.46              |
| 1:A:947:LEU:HD13 | 1:A:955:GLN:HA    | 1.97                     | 0.46              |
| 1:A:749:VAL:HG13 | 1:A:785:LEU:CD2   | 2.46                     | 0.46              |
| 1:A:550:PRO:HB2  | 1:A:690:LEU:HD23  | 1.97                     | 0.46              |
| 1:A:879:GLN:O    | 1:A:883:GLU:HG3   | 2.15                     | 0.45              |
| 1:A:399:ILE:HG13 | 1:A:400:SER:N     | 2.31                     | 0.45              |

Continued on next page...

Continued from previous page...

| Atom-1           | Atom-2            | Interatomic distance (Å) | Clash overlap (Å) |
|------------------|-------------------|--------------------------|-------------------|
| 1:A:942:ARG:HD2  | 1:A:961:ILE:HG21  | 1.99                     | 0.45              |
| 1:A:529:LEU:O    | 1:A:533:ILE:N     | 2.45                     | 0.44              |
| 1:A:750:LYS:O    | 1:A:784:ASN:N     | 2.48                     | 0.44              |
| 2:X:3:A:H2'      | 2:X:4:G:O4'       | 2.17                     | 0.44              |
| 1:A:544:ASP:OD1  | 1:A:545:ASP:N     | 2.50                     | 0.44              |
| 3:Y:10:G:O2'     | 3:Y:11:C:H5'      | 2.18                     | 0.44              |
| 2:X:6:C:H2'      | 2:X:7:G:H8        | 1.83                     | 0.44              |
| 3:Y:3:C:O2'      | 3:Y:4:U:H5'       | 2.17                     | 0.44              |
| 1:A:545:ASP:OD1  | 1:A:545:ASP:N     | 2.50                     | 0.44              |
| 1:A:899:ASN:HB2  | 1:A:1008:ILE:HG21 | 1.97                     | 0.44              |
| 1:A:626:HIS:O    | 1:A:629:THR:OG1   | 2.32                     | 0.43              |
| 2:X:8:A:O2'      | 2:X:9:G:H5'       | 2.18                     | 0.43              |
| 1:A:599:ARG:NH2  | 1:A:908:LYS:HG2   | 2.34                     | 0.43              |
| 2:X:2:A:O2'      | 2:X:3:A:H5'       | 2.18                     | 0.43              |
| 1:A:620:MET:SD   | 1:A:620:MET:N     | 2.91                     | 0.43              |
| 3:Y:4:U:H2'      | 3:Y:5:C:H6        | 1.84                     | 0.43              |
| 2:X:8:A:H2'      | 2:X:9:G:C8        | 2.54                     | 0.42              |
| 3:Y:4:U:H2'      | 3:Y:5:C:C6        | 2.54                     | 0.42              |
| 1:A:728:ARG:NH2  | 3:Y:7:U:OP2       | 2.50                     | 0.42              |
| 1:A:446:CYS:HA   | 1:A:455:TYR:OH    | 2.19                     | 0.42              |
| 1:A:500:GLN:NE2  | 1:A:860:ARG:HD2   | 2.35                     | 0.42              |
| 1:A:944:ASN:H    | 1:A:955:GLN:CG    | 2.28                     | 0.42              |
| 1:A:973:VAL:O    | 3:Y:14:G:H5'      | 2.19                     | 0.42              |
| 1:A:360:VAL:HG12 | 1:A:440:LEU:HB3   | 2.01                     | 0.42              |
| 3:Y:4:U:O2'      | 3:Y:5:C:H5'       | 2.19                     | 0.42              |
| 2:X:6:C:H2'      | 2:X:7:G:C8        | 2.55                     | 0.42              |
| 1:A:698:ASN:OD1  | 1:A:699:GLU:N     | 2.53                     | 0.42              |
| 1:A:734:LEU:HB2  | 1:A:787:ILE:HD13  | 2.02                     | 0.42              |
| 1:A:552:LYS:HG2  | 1:A:556:LEU:HD13  | 2.02                     | 0.41              |
| 1:A:742:ALA:O    | 1:A:746:GLU:HG3   | 2.20                     | 0.41              |
| 1:A:714:ARG:NH2  | 1:A:827:GLU:O     | 2.52                     | 0.41              |
| 1:A:425:LEU:HB2  | 1:A:432:GLY:HA3   | 2.03                     | 0.41              |
| 1:A:689:LYS:HA   | 1:A:689:LYS:HE2   | 2.01                     | 0.41              |
| 1:A:702:ILE:HA   | 1:A:705:ARG:HD3   | 2.02                     | 0.41              |
| 1:A:826:ASP:O    | 1:A:827:GLU:HB2   | 2.19                     | 0.41              |
| 1:A:947:LEU:CD1  | 1:A:956:THR:H     | 2.32                     | 0.41              |
| 1:A:323:GLY:O    | 1:A:484:GLN:NE2   | 2.53                     | 0.41              |
| 1:A:826:ASP:OD1  | 1:A:827:GLU:N     | 2.49                     | 0.41              |
| 1:A:884:LYS:O    | 1:A:888:VAL:HG23  | 2.20                     | 0.41              |
| 1:A:751:ALA:HB2  | 1:A:785:LEU:CD2   | 2.51                     | 0.41              |
| 3:Y:8:C:O2'      | 3:Y:9:G:H5'       | 2.20                     | 0.41              |

Continued on next page...

Continued from previous page...

| Atom-1          | Atom-2           | Interatomic distance (Å) | Clash overlap (Å) |
|-----------------|------------------|--------------------------|-------------------|
| 2:X:4:G:O2'     | 2:X:5:C:H5'      | 2.21                     | 0.41              |
| 1:A:751:ALA:HA  | 1:A:783:ILE:HG23 | 2.04                     | 0.41              |
| 2:X:1:C:O2'     | 2:X:2:A:H5'      | 2.21                     | 0.40              |
| 3:Y:3:C:H2'     | 3:Y:4:U:C6       | 2.57                     | 0.40              |
| 1:A:748:GLY:O   | 1:A:784:ASN:ND2  | 2.50                     | 0.40              |
| 1:A:962:CYS:HB2 | 1:A:968:TRP:CZ2  | 2.56                     | 0.40              |
| 3:Y:10:G:C2'    | 3:Y:11:C:H5'     | 2.52                     | 0.40              |
| 3:Y:9:G:H2'     | 3:Y:10:G:C8      | 2.56                     | 0.40              |

There are no symmetry-related clashes.

## 5.3 Torsion angles [i](#)

### 5.3.1 Protein backbone [i](#)

In the following table, the Percentiles column shows the percent Ramachandran outliers of the chain as a percentile score with respect to all PDB entries followed by that with respect to all EM entries.

The Analysed column shows the number of residues for which the backbone conformation was analysed, and the total number of residues.

| Mol | Chain | Analysed      | Favoured  | Allowed  | Outliers | Percentiles |
|-----|-------|---------------|-----------|----------|----------|-------------|
| 1   | A     | 674/696 (97%) | 603 (90%) | 69 (10%) | 2 (0%)   | 43 78       |

All (2) Ramachandran outliers are listed below:

| Mol | Chain | Res | Type |
|-----|-------|-----|------|
| 1   | A     | 794 | GLU  |
| 1   | A     | 826 | ASP  |

### 5.3.2 Protein sidechains [i](#)

In the following table, the Percentiles column shows the percent sidechain outliers of the chain as a percentile score with respect to all PDB entries followed by that with respect to all EM entries.

The Analysed column shows the number of residues for which the sidechain conformation was analysed, and the total number of residues.

| Mol | Chain | Analysed      | Rotameric | Outliers | Percentiles |
|-----|-------|---------------|-----------|----------|-------------|
| 1   | A     | 608/625 (97%) | 604 (99%) | 4 (1%)   | 85 93       |

All (4) residues with a non-rotameric sidechain are listed below:

| Mol | Chain | Res | Type |
|-----|-------|-----|------|
| 1   | A     | 595 | ASN  |
| 1   | A     | 599 | ARG  |
| 1   | A     | 615 | ASN  |
| 1   | A     | 945 | LYS  |

Some sidechains can be flipped to improve hydrogen bonding and reduce clashes. All (4) such sidechains are listed below:

| Mol | Chain | Res | Type |
|-----|-------|-----|------|
| 1   | A     | 563 | GLN  |
| 1   | A     | 595 | ASN  |
| 1   | A     | 678 | ASN  |
| 1   | A     | 957 | ASN  |

### 5.3.3 RNA [i](#)

| Mol | Chain | Analysed    | Backbone Outliers | Pucker Outliers |
|-----|-------|-------------|-------------------|-----------------|
| 2   | X     | 13/14 (92%) | 0                 | 0               |
| 3   | Y     | 13/14 (92%) | 0                 | 0               |
| All | All   | 26/28 (92%) | 0                 | 0               |

There are no RNA backbone outliers to report.

There are no RNA pucker outliers to report.

### 5.4 Non-standard residues in protein, DNA, RNA chains [i](#)

There are no non-standard protein/DNA/RNA residues in this entry.

### 5.5 Carbohydrates [i](#)

There are no carbohydrates in this entry.

## 5.6 Ligand geometry [i](#)

Of 2 ligands modelled in this entry, 1 is monoatomic - leaving 1 for Mogul analysis.

In the following table, the Counts columns list the number of bonds (or angles) for which Mogul statistics could be retrieved, the number of bonds (or angles) that are observed in the model and the number of bonds (or angles) that are defined in the Chemical Component Dictionary. The Link column lists molecule types, if any, to which the group is linked. The Z score for a bond length (or angle) is the number of standard deviations the observed value is removed from the expected value. A bond length (or angle) with  $|Z| > 2$  is considered an outlier worth inspection. RMSZ is the root-mean-square of all Z scores of the bond lengths (or angles).

| Mol | Type | Chain | Res  | Link | Bond lengths |      |          | Bond angles |      |          |
|-----|------|-------|------|------|--------------|------|----------|-------------|------|----------|
|     |      |       |      |      | Counts       | RMSZ | # Z  > 2 | Counts      | RMSZ | # Z  > 2 |
| 5   | ANP  | A     | 1102 | -    | 29,33,33     | 2.71 | 6 (20%)  | 29,52,52    | 1.10 | 1 (3%)   |

In the following table, the Chirals column lists the number of chiral outliers, the number of chiral centers analysed, the number of these observed in the model and the number defined in the Chemical Component Dictionary. Similar counts are reported in the Torsion and Rings columns. '-' means no outliers of that kind were identified.

| Mol | Type | Chain | Res  | Link | Chirals | Torsions   | Rings   |
|-----|------|-------|------|------|---------|------------|---------|
| 5   | ANP  | A     | 1102 | -    | -       | 1/13/38/38 | 0/3/3/3 |

All (6) bond length outliers are listed below:

| Mol | Chain | Res  | Type | Atoms  | Z     | Observed(Å) | Ideal(Å) |
|-----|-------|------|------|--------|-------|-------------|----------|
| 5   | A     | 1102 | ANP  | PB-O2B | -2.58 | 1.49        | 1.56     |
| 5   | A     | 1102 | ANP  | PG-O2G | -2.52 | 1.49        | 1.56     |
| 5   | A     | 1102 | ANP  | PB-O3A | -2.41 | 1.56        | 1.59     |
| 5   | A     | 1102 | ANP  | PG-N3B | 2.25  | 1.69        | 1.63     |
| 5   | A     | 1102 | ANP  | PB-O1B | 8.69  | 1.55        | 1.46     |
| 5   | A     | 1102 | ANP  | PG-O1G | 10.15 | 1.57        | 1.46     |

All (1) bond angle outliers are listed below:

| Mol | Chain | Res  | Type | Atoms     | Z     | Observed(°) | Ideal(°) |
|-----|-------|------|------|-----------|-------|-------------|----------|
| 5   | A     | 1102 | ANP  | PA-O3A-PB | -3.86 | 118.87      | 132.40   |

There are no chirality outliers.

All (1) torsion outliers are listed below:

| Mol | Chain | Res  | Type | Atoms         |
|-----|-------|------|------|---------------|
| 5   | A     | 1102 | ANP  | O1B-PB-N3B-PG |

There are no ring outliers.

1 monomer is involved in 2 short contacts:

| Mol | Chain | Res  | Type | Clashes | Symm-Clashes |
|-----|-------|------|------|---------|--------------|
| 5   | A     | 1102 | ANP  | 2       | 0            |

### 5.7 Other polymers [i](#)

There are no such residues in this entry.

### 5.8 Polymer linkage issues [i](#)

There are no chain breaks in this entry.

CONFIDENTIAL VALIDATION REPORT



# Full wwPDB/EMDatabank EM Map/Model Validation Report ⓘ

Apr 4, 2018 – 10:25 AM BST

PDB ID : 6G1S  
EMDB ID: : EMD-4340  
Title : CryoEM structure of the MDA5-dsRNA filament with 87-degree helical twist  
Deposited on : 2018-03-21  
Resolution : 3.93 Å(reported)

This is a Full wwPDB/EMDatabank EM Map/Model Validation Report.

This report is produced by the wwPDB biocuration pipeline after annotation of the structure.

We welcome your comments at [validation@mail.wwpdb.org](mailto:validation@mail.wwpdb.org)

A user guide is available at

<https://www.wwpdb.org/validation/2017/EMValidationReportHelp>

with specific help available everywhere you see the ⓘ symbol.

---

MolProbity : 4.02b-467  
Percentile statistics : 20171227.v01 (using entries in the PDB archive December 27th 2017)  
Ideal geometry (proteins) : Engh & Huber (2001)  
Ideal geometry (DNA, RNA) : Parkinson et. al. (1996)  
Validation Pipeline (wwPDB-VP) : rb-20031021



# 1 Overall quality at a glance i

The following experimental techniques were used to determine the structure:  
*ELECTRON MICROSCOPY*

The reported resolution of this entry is 3.93 Å.

Percentile scores (ranging between 0-100) for global validation metrics of the entry are shown in the following graphic. The table shows the number of entries on which the scores are based.

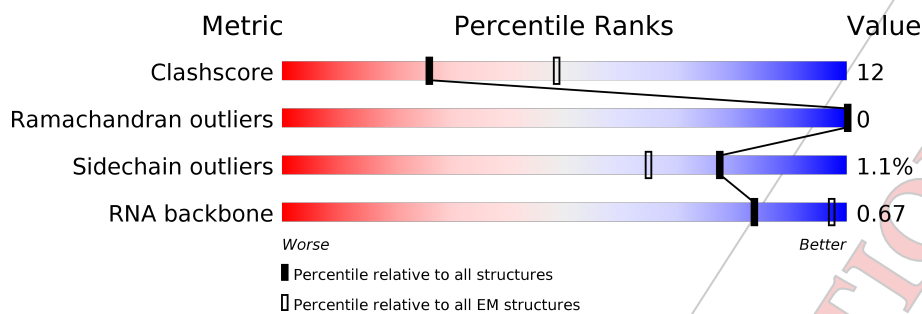

| Metric                | Whole archive (#Entries) | EM structures (#Entries) |
|-----------------------|--------------------------|--------------------------|
| Clashscore            | 136327                   | 1886                     |
| Ramachandran outliers | 132723                   | 1663                     |
| Sidechain outliers    | 132532                   | 1531                     |
| RNA backbone          | 3747                     | 458                      |

The table below summarises the geometric issues observed across the polymeric chains. The red, orange, yellow and green segments on the bar indicate the fraction of residues that contain outliers for  $\geq 3$ , 2, 1 and 0 types of geometric quality criteria. A grey segment represents the fraction of residues that are not modelled. The numeric value for each fraction is indicated below the corresponding segment, with a dot representing fractions  $\leq 5\%$

| Mol | Chain | Length | Quality of chain |
|-----|-------|--------|------------------|
| 1   | A     | 693    | 72% 21% 7%       |
| 2   | X     | 15     | 7% 93%           |
| 3   | Y     | 15     | 7% 93%           |

## 2 Entry composition i

There are 4 unique types of molecules in this entry. The entry contains 9891 atoms, of which 4096 are hydrogens and 0 are deuteriums.

In the tables below, the AltConf column contains the number of residues with at least one atom in alternate conformation and the Trace column contains the number of residues modelled with at most 2 atoms.

- Molecule 1 is a protein called Interferon-induced helicase C domain-containing protein 1.

| Mol | Chain | Residues | Atoms |      |      |     |     |    | AltConf | Trace |
|-----|-------|----------|-------|------|------|-----|-----|----|---------|-------|
|     |       |          | Total | C    | H    | N   | O   | S  |         |       |
| 1   | A     | 645      | 9251  | 3279 | 4096 | 893 | 949 | 34 | 0       | 0     |

There are 18 discrepancies between the modelled and reference sequences:

| Chain | Residue | Modelled | Actual | Comment  | Reference  |
|-------|---------|----------|--------|----------|------------|
| A     | ?       | -        | ASP    | deletion | UNP Q8R5F7 |
| A     | ?       | -        | LYS    | deletion | UNP Q8R5F7 |
| A     | ?       | -        | SER    | deletion | UNP Q8R5F7 |
| A     | ?       | -        | ASP    | deletion | UNP Q8R5F7 |
| A     | ?       | -        | ASP    | deletion | UNP Q8R5F7 |
| A     | ?       | -        | GLU    | deletion | UNP Q8R5F7 |
| A     | ?       | -        | ALA    | deletion | UNP Q8R5F7 |
| A     | ?       | -        | SER    | deletion | UNP Q8R5F7 |
| A     | ?       | -        | SER    | deletion | UNP Q8R5F7 |
| A     | ?       | -        | CYS    | deletion | UNP Q8R5F7 |
| A     | ?       | -        | ASN    | deletion | UNP Q8R5F7 |
| A     | ?       | -        | ASP    | deletion | UNP Q8R5F7 |
| A     | ?       | -        | GLN    | deletion | UNP Q8R5F7 |
| A     | ?       | -        | LEU    | deletion | UNP Q8R5F7 |
| A     | ?       | -        | LYS    | deletion | UNP Q8R5F7 |
| A     | ?       | -        | GLY    | deletion | UNP Q8R5F7 |
| A     | ?       | -        | ASP    | deletion | UNP Q8R5F7 |
| A     | ?       | -        | VAL    | deletion | UNP Q8R5F7 |

- Molecule 2 is a RNA chain called RNA (5'-R(P\*UP\*CP\*CP\*AP\*UP\*GP\*CP\*GP\*CP\*AP\*UP\*GP\*AP\*CP\*G)-3').

| Mol | Chain | Residues | Atoms |     |    |     |    | AltConf | Trace |
|-----|-------|----------|-------|-----|----|-----|----|---------|-------|
|     |       |          | Total | C   | N  | O   | P  |         |       |
| 2   | X     | 15       | 318   | 142 | 56 | 105 | 15 | 0       | 0     |

- Molecule 3 is a RNA chain called RNA (5'-R(P\*CP\*GP\*UP\*CP\*AP\*UP\*GP\*CP\*GP\*CP

\*AP\*UP\*GP\*GP\*A)-3').

| Mol | Chain | Residues | Atoms |     |    |     |    | AltConf | Trace |
|-----|-------|----------|-------|-----|----|-----|----|---------|-------|
|     |       |          | Total | C   | N  | O   | P  |         |       |
| 3   | Y     | 15       | 321   | 143 | 58 | 105 | 15 | 0       | 0     |

- Molecule 4 is ZINC ION (three-letter code: ZN) (formula: Zn).

| Mol | Chain | Residues | Atoms |    | AltConf |
|-----|-------|----------|-------|----|---------|
|     |       |          | Total | Zn |         |
| 4   | A     | 1        | 1     | 1  | 0       |

CONFIDENTIAL VALIDATION REPORT

### 3 Residue-property plots [i](#)

These plots are drawn for all protein, RNA and DNA chains in the entry. The first graphic for a chain summarises the proportions of the various outlier classes displayed in the second graphic. The second graphic shows the sequence view annotated by issues in geometry. Residues are color-coded according to the number of geometric quality criteria for which they contain at least one outlier: green = 0, yellow = 1, orange = 2 and red = 3 or more. Stretches of two or more consecutive residues without any outlier are shown as a green connector. Residues present in the sample, but not in the model, are shown in grey.

- Molecule 1: Interferon-induced helicase C domain-containing protein 1

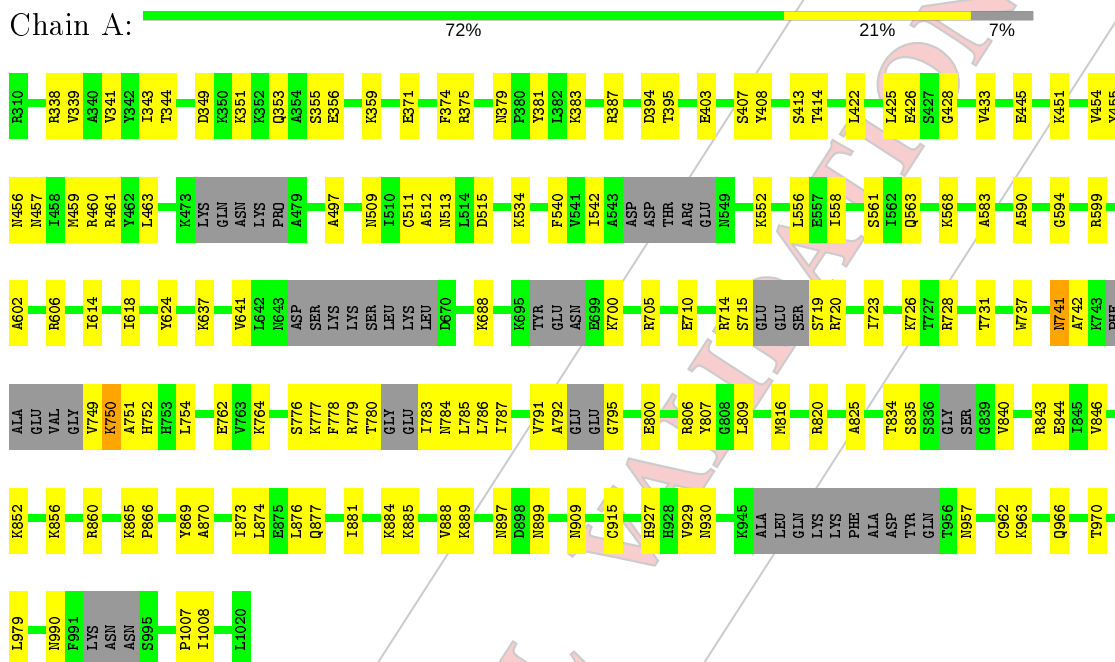

- Molecule 2: RNA (5'-R(P\*UP\*CP\*CP\*AP\*UP\*GP\*CP\*GP\*CP\*AP\*UP\*GP\*AP\*CP\*G)-3')

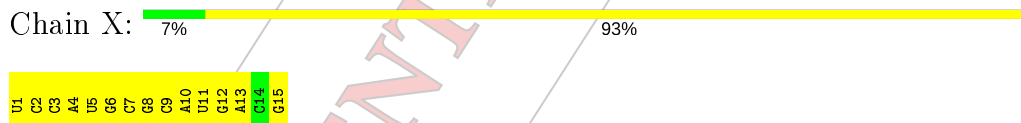

- Molecule 3: RNA (5'-R(P\*CP\*GP\*UP\*CP\*AP\*UP\*GP\*CP\*GP\*CP\*AP\*UP\*GP\*GP\*A)-3')

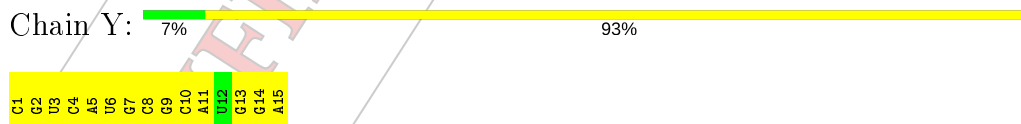

## 4 Experimental information [i](#)

| Property                           | Value                                                 | Source    |
|------------------------------------|-------------------------------------------------------|-----------|
| Reconstruction method              | HELICAL                                               | Depositor |
| Imposed symmetry                   | HELICAL, twist=87.3689°, rise=44.5102 Å, axial sym=C1 | Depositor |
| Number of segments used            | 60079                                                 | Depositor |
| Resolution determination method    | FSC 0.143 CUT-OFF                                     | Depositor |
| CTF correction method              | PHASE FLIPPING AND AMPLITUDE CORRECTION               | Depositor |
| Microscope                         | FEI TITAN KRIOS                                       | Depositor |
| Voltage (kV)                       | 300                                                   | Depositor |
| Electron dose ( $e^-/\text{Å}^2$ ) | 29.85                                                 | Depositor |
| Minimum defocus (nm)               | 1800                                                  | Depositor |
| Maximum defocus (nm)               | 2700                                                  | Depositor |
| Magnification                      | 75000                                                 | Depositor |
| Image detector                     | FEI FALCON III (4k x 4k)                              | Depositor |

CONFIDENTIAL

VALIDATION REPORT

## 5 Model quality i

### 5.1 Standard geometry i

Bond lengths and bond angles in the following residue types are not validated in this section:  
ZN

The Z score for a bond length (or angle) is the number of standard deviations the observed value is removed from the expected value. A bond length (or angle) with  $|Z| > 5$  is considered an outlier worth inspection. RMSZ is the root-mean-square of all Z scores of the bond lengths (or angles).

| Mol | Chain | Bond lengths |         | Bond angles |               |
|-----|-------|--------------|---------|-------------|---------------|
|     |       | RMSZ         | # Z  >2 | RMSZ        | # Z  >2       |
| 1   | A     | 0.39         | 0/5231  | 0.57        | 1/7025 (0.0%) |
| 2   | X     | 0.57         | 0/354   | 0.87        | 0/549         |
| 3   | Y     | 0.58         | 0/358   | 0.85        | 0/556         |
| All | All   | 0.42         | 0/5943  | 0.62        | 1/8130 (0.0%) |

Chiral center outliers are detected by calculating the chiral volume of a chiral center and verifying if the center is modelled as a planar moiety or with the opposite hand. A planarity outlier is detected by checking planarity of atoms in a peptide group, atoms in a mainchain group or atoms of a sidechain that are expected to be planar.

| Mol | Chain | #Chirality outliers | #Planarity outliers |
|-----|-------|---------------------|---------------------|
| 1   | A     | 0                   | 3                   |

There are no bond length outliers.

All (1) bond angle outliers are listed below:

| Mol | Chain | Res | Type | Atoms  | Z    | Observed(°) | Ideal(°) |
|-----|-------|-----|------|--------|------|-------------|----------|
| 1   | A     | 497 | ALA  | C-N-CA | 9.22 | 144.74      | 121.70   |

There are no chirality outliers.

All (3) planarity outliers are listed below:

| Mol | Chain | Res | Type | Group   |
|-----|-------|-----|------|---------|
| 1   | A     | 428 | GLY  | Peptide |
| 1   | A     | 454 | VAL  | Peptide |
| 1   | A     | 762 | GLU  | Peptide |

## 5.2 Too-close contacts [\(i\)](#)

In the following table, the Non-H and H(model) columns list the number of non-hydrogen atoms and hydrogen atoms in the chain respectively. The H(added) column lists the number of hydrogen atoms added and optimized by MolProbity. The Clashes column lists the number of clashes within the asymmetric unit, whereas Symm-Clashes lists symmetry related clashes.

| Mol | Chain | Non-H | H(model) | H(added) | Clashes | Symm-Clashes |
|-----|-------|-------|----------|----------|---------|--------------|
| 1   | A     | 5155  | 4096     | 5272     | 102     | 0            |
| 2   | X     | 318   | 0        | 163      | 21      | 0            |
| 3   | Y     | 321   | 0        | 163      | 22      | 0            |
| 4   | A     | 1     | 0        | 0        | 0       | 0            |
| All | All   | 5795  | 4096     | 5598     | 139     | 0            |

The all-atom clashscore is defined as the number of clashes found per 1000 atoms (including hydrogen atoms). The all-atom clashscore for this structure is 12.

All (139) close contacts within the same asymmetric unit are listed below, sorted by their clash magnitude.

| Atom-1           | Atom-2           | Interatomic distance (Å) | Clash overlap (Å) |
|------------------|------------------|--------------------------|-------------------|
| 1:A:777:LYS:O    | 1:A:780:THR:OG1  | 2.02                     | 0.78              |
| 1:A:749:VAL:HA   | 1:A:784:ASN:HD22 | 1.51                     | 0.75              |
| 1:A:515:ASP:OD1  | 1:A:877:GLN:NE2  | 2.19                     | 0.74              |
| 1:A:791:VAL:HG23 | 3:Y:7:G:H5''     | 1.72                     | 0.71              |
| 1:A:599:ARG:NH1  | 1:A:909:ASN:OD1  | 2.22                     | 0.71              |
| 1:A:806:ARG:HD2  | 1:A:809:LEU:HD23 | 1.73                     | 0.71              |
| 1:A:374:PHE:O    | 1:A:379:ASN:ND2  | 2.24                     | 0.70              |
| 1:A:445:GLU:O    | 1:A:455:TYR:OH   | 2.09                     | 0.69              |
| 1:A:715:SER:HG   | 1:A:719:SER:N    | 1.90                     | 0.69              |
| 1:A:457:ASN:OD1  | 1:A:460:ARG:NH2  | 2.26                     | 0.69              |
| 2:X:5:U:H2'      | 2:X:6:G:H8       | 1.59                     | 0.68              |
| 3:Y:1:C:H2'      | 3:Y:2:G:C8       | 2.29                     | 0.67              |
| 1:A:792:ALA:O    | 1:A:795:GLY:N    | 2.29                     | 0.66              |
| 1:A:341:VAL:O    | 1:A:344:THR:OG1  | 2.15                     | 0.65              |
| 3:Y:4:C:H2'      | 3:Y:5:A:C8       | 2.32                     | 0.65              |
| 1:A:865:LYS:HD2  | 1:A:866:PRO:HD2  | 1.78                     | 0.64              |
| 3:Y:3:U:H2'      | 3:Y:4:C:H6       | 1.62                     | 0.64              |
| 1:A:351:LYS:O    | 1:A:355:SER:N    | 2.30                     | 0.64              |
| 2:X:5:U:H2'      | 2:X:6:G:C8       | 2.32                     | 0.64              |
| 1:A:590:ALA:HB3  | 1:A:599:ARG:HB3  | 1.80                     | 0.64              |
| 1:A:909:ASN:ND2  | 1:A:966:GLN:OE1  | 2.31                     | 0.64              |
| 3:Y:3:U:H2'      | 3:Y:4:C:C6       | 2.33                     | 0.63              |
| 2:X:9:C:H2'      | 2:X:10:A:C8      | 2.34                     | 0.62              |

*Continued on next page...*

Continued from previous page...

| Atom-1           | Atom-2           | Interatomic distance (Å) | Clash overlap (Å) |
|------------------|------------------|--------------------------|-------------------|
| 1:A:558:ILE:O    | 1:A:561:SER:OG   | 2.14                     | 0.62              |
| 2:X:3:C:H2'      | 2:X:4:A:C8       | 2.35                     | 0.62              |
| 1:A:511:CYS:O    | 1:A:515:ASP:N    | 2.33                     | 0.62              |
| 3:Y:4:C:H2'      | 3:Y:5:A:H8       | 1.64                     | 0.62              |
| 3:Y:2:G:O2'      | 3:Y:3:U:H5'      | 2.00                     | 0.61              |
| 1:A:624:TYR:CZ   | 1:A:688:LYS:HB2  | 2.36                     | 0.61              |
| 1:A:957:ASN:HB3  | 1:A:970:THR:CG2  | 2.31                     | 0.61              |
| 1:A:728:ARG:O    | 1:A:731:THR:OG1  | 2.11                     | 0.61              |
| 2:X:4:A:O2'      | 2:X:5:U:H5'      | 2.02                     | 0.60              |
| 2:X:12:G:H2'     | 2:X:13:A:H8      | 1.67                     | 0.60              |
| 1:A:371:GLU:OE2  | 1:A:375:ARG:NH2  | 2.34                     | 0.60              |
| 1:A:927:HIS:NE2  | 2:X:5:U:O2'      | 2.29                     | 0.59              |
| 1:A:413:SER:OG   | 1:A:414:THR:N    | 2.34                     | 0.59              |
| 3:Y:1:C:H2'      | 3:Y:2:G:H8       | 1.68                     | 0.58              |
| 1:A:962:CYS:SG   | 1:A:963:LYS:N    | 2.77                     | 0.58              |
| 1:A:387:ARG:NH1  | 1:A:407:SER:OG   | 2.37                     | 0.57              |
| 2:X:12:G:H2'     | 2:X:13:A:C8      | 2.39                     | 0.57              |
| 1:A:816:MET:O    | 1:A:820:ARG:HG3  | 2.03                     | 0.57              |
| 1:A:800:GLU:HG2  | 1:A:825:ALA:HB2  | 1.86                     | 0.56              |
| 1:A:870:ALA:HA   | 1:A:873:ILE:HG12 | 1.85                     | 0.56              |
| 1:A:752:HIS:CB   | 1:A:783:ILE:HG12 | 2.35                     | 0.56              |
| 1:A:751:ALA:HB2  | 1:A:785:LEU:HD21 | 1.88                     | 0.56              |
| 1:A:749:VAL:HG12 | 1:A:785:LEU:HD22 | 1.88                     | 0.55              |
| 1:A:614:ILE:O    | 1:A:618:ILE:N    | 2.39                     | 0.55              |
| 3:Y:10:C:O2'     | 3:Y:11:A:H5'     | 2.06                     | 0.54              |
| 3:Y:14:G:H2'     | 3:Y:15:A:H8      | 1.72                     | 0.54              |
| 2:X:3:C:H2'      | 2:X:4:A:H8       | 1.71                     | 0.54              |
| 1:A:425:LEU:HB2  | 1:A:433:VAL:H    | 1.71                     | 0.54              |
| 1:A:459:MET:O    | 1:A:463:LEU:HG   | 2.08                     | 0.54              |
| 2:X:9:C:H2'      | 2:X:10:A:H8      | 1.72                     | 0.54              |
| 3:Y:7:G:O2'      | 3:Y:8:C:H5'      | 2.08                     | 0.53              |
| 1:A:637:LYS:O    | 1:A:641:VAL:HG23 | 2.09                     | 0.53              |
| 2:X:2:C:H2'      | 2:X:3:C:H6       | 1.73                     | 0.53              |
| 1:A:339:VAL:O    | 1:A:343:ILE:HD12 | 2.08                     | 0.53              |
| 1:A:728:ARG:NH2  | 3:Y:7:G:OP2      | 2.41                     | 0.53              |
| 1:A:731:THR:HG22 | 1:A:787:ILE:HG22 | 1.92                     | 0.52              |
| 3:Y:5:A:O2'      | 3:Y:6:U:H5'      | 2.08                     | 0.52              |
| 1:A:426:GLU:OE1  | 1:A:461:ARG:NH1  | 2.41                     | 0.52              |
| 1:A:710:GLU:O    | 1:A:714:ARG:HG3  | 2.09                     | 0.52              |
| 1:A:749:VAL:HA   | 1:A:784:ASN:ND2  | 2.23                     | 0.52              |
| 1:A:349:ASP:O    | 1:A:353:GLN:HG2  | 2.10                     | 0.52              |

Continued on next page...



Continued from previous page...

| Atom-1           | Atom-2           | Interatomic distance (Å) | Clash overlap (Å) |
|------------------|------------------|--------------------------|-------------------|
| 1:A:351:LYS:HD2  | 1:A:356:GLU:HB2  | 1.92                     | 0.51              |
| 2:X:1:U:H2'      | 2:X:2:C:C6       | 2.45                     | 0.51              |
| 1:A:754:LEU:N    | 1:A:787:ILE:O    | 2.44                     | 0.51              |
| 1:A:899:ASN:HB2  | 1:A:1008:ILE:CG2 | 2.41                     | 0.50              |
| 1:A:451:LYS:HB2  | 2:X:10:A:H5''    | 1.94                     | 0.50              |
| 3:Y:3:U:O2'      | 3:Y:4:C:H5'      | 2.12                     | 0.50              |
| 2:X:6:G:O2'      | 2:X:7:C:H5'      | 2.11                     | 0.50              |
| 1:A:852:LYS:O    | 1:A:856:LYS:HG2  | 2.12                     | 0.50              |
| 1:A:897:ASN:HD22 | 1:A:1007:PRO:CG  | 2.25                     | 0.49              |
| 1:A:915:CYS:SG   | 1:A:930:ASN:ND2  | 2.83                     | 0.49              |
| 1:A:929:VAL:HG21 | 1:A:979:LEU:HD22 | 1.95                     | 0.49              |
| 1:A:752:HIS:HB2  | 1:A:783:ILE:HG12 | 1.95                     | 0.49              |
| 2:X:2:C:H2'      | 2:X:3:C:C6       | 2.48                     | 0.49              |
| 1:A:422:LEU:O    | 1:A:425:LEU:HB3  | 2.13                     | 0.48              |
| 1:A:403:GLU:O    | 1:A:407:SER:N    | 2.46                     | 0.48              |
| 2:X:7:C:H2'      | 2:X:8:G:C8       | 2.48                     | 0.48              |
| 2:X:1:U:H2'      | 2:X:2:C:H6       | 1.77                     | 0.48              |
| 3:Y:14:G:H2'     | 3:Y:15:A:C8      | 2.48                     | 0.48              |
| 3:Y:6:U:H2'      | 3:Y:7:G:C8       | 2.48                     | 0.48              |
| 1:A:752:HIS:HB3  | 1:A:783:ILE:HG12 | 1.95                     | 0.48              |
| 1:A:540:PHE:HE1  | 1:A:844:GLU:HG2  | 1.79                     | 0.48              |
| 1:A:563:GLN:NE2  | 1:A:568:LYS:O    | 2.46                     | 0.48              |
| 1:A:776:SER:O    | 1:A:779:ARG:HB2  | 2.14                     | 0.47              |
| 1:A:843:ARG:HA   | 1:A:846:VAL:HG12 | 1.96                     | 0.47              |
| 1:A:425:LEU:HD22 | 1:A:433:VAL:C    | 2.35                     | 0.47              |
| 1:A:750:LYS:HD2  | 1:A:784:ASN:ND2  | 2.29                     | 0.47              |
| 1:A:509:ASN:HD21 | 1:A:876:LEU:HD22 | 1.80                     | 0.47              |
| 1:A:720:ARG:NH1  | 1:A:778:PHE:O    | 2.43                     | 0.47              |
| 1:A:512:ALA:HB1  | 1:A:877:GLN:HG3  | 1.96                     | 0.47              |
| 2:X:8:G:O2'      | 2:X:9:C:H5'      | 2.14                     | 0.47              |
| 2:X:10:A:O2'     | 2:X:11:U:H5'     | 2.15                     | 0.47              |
| 1:A:873:ILE:O    | 1:A:877:GLN:HG3  | 2.14                     | 0.46              |
| 2:X:2:C:O2'      | 2:X:3:C:H5'      | 2.16                     | 0.46              |
| 1:A:542:ILE:HG21 | 1:A:835:SER:HB3  | 1.96                     | 0.46              |
| 1:A:540:PHE:CE1  | 1:A:844:GLU:HG2  | 2.50                     | 0.46              |
| 1:A:834:THR:HG21 | 1:A:840:VAL:HG21 | 1.96                     | 0.46              |
| 1:A:962:CYS:HB3  | 1:A:966:GLN:H    | 1.81                     | 0.46              |
| 3:Y:6:U:H2'      | 3:Y:7:G:H8       | 1.81                     | 0.45              |
| 1:A:425:LEU:HD22 | 1:A:433:VAL:O    | 2.17                     | 0.45              |
| 1:A:359:LYS:NZ   | 1:A:407:SER:O    | 2.50                     | 0.44              |
| 1:A:542:ILE:CG2  | 1:A:835:SER:HB3  | 2.47                     | 0.44              |

Continued on next page...

Continued from previous page...

| Atom-1           | Atom-2           | Interatomic distance (Å) | Clash overlap (Å) |
|------------------|------------------|--------------------------|-------------------|
| 1:A:869:TYR:O    | 1:A:873:ILE:HG23 | 2.17                     | 0.44              |
| 1:A:407:SER:OG   | 1:A:408:TYR:N    | 2.50                     | 0.44              |
| 1:A:509:ASN:ND2  | 1:A:876:LEU:HD22 | 2.31                     | 0.44              |
| 1:A:705:ARG:HD3  | 1:A:737:TRP:CH2  | 2.52                     | 0.44              |
| 3:Y:13:G:O2'     | 3:Y:14:G:H5'     | 2.18                     | 0.44              |
| 3:Y:8:C:H2'      | 3:Y:9:G:C8       | 2.53                     | 0.44              |
| 1:A:929:VAL:HG21 | 1:A:979:LEU:HB3  | 2.00                     | 0.44              |
| 1:A:778:PHE:CG   | 1:A:786:LEU:HD11 | 2.54                     | 0.43              |
| 1:A:777:LYS:HB3  | 1:A:783:ILE:HD12 | 2.01                     | 0.43              |
| 3:Y:14:G:O2'     | 3:Y:15:A:H5'     | 2.19                     | 0.43              |
| 1:A:552:LYS:HG2  | 1:A:556:LEU:HD13 | 2.00                     | 0.43              |
| 1:A:897:ASN:HD22 | 1:A:1007:PRO:HG2 | 1.83                     | 0.43              |
| 1:A:590:ALA:O    | 1:A:594:GLY:N    | 2.52                     | 0.43              |
| 1:A:338:ARG:NH1  | 1:A:381:TYR:OH   | 2.52                     | 0.42              |
| 1:A:741:ASN:HD22 | 1:A:742:ALA:H    | 1.67                     | 0.42              |
| 1:A:856:LYS:O    | 1:A:860:ARG:HG3  | 2.19                     | 0.42              |
| 1:A:884:LYS:O    | 1:A:888:VAL:HG23 | 2.18                     | 0.42              |
| 1:A:509:ASN:O    | 1:A:513:ASN:ND2  | 2.53                     | 0.42              |
| 1:A:749:VAL:CG1  | 1:A:785:LEU:HD22 | 2.48                     | 0.42              |
| 1:A:723:ILE:HD12 | 1:A:787:ILE:HG12 | 2.00                     | 0.42              |
| 1:A:791:VAL:HG22 | 3:Y:7:G:O3'      | 2.20                     | 0.42              |
| 1:A:379:ASN:O    | 1:A:383:LYS:N    | 2.45                     | 0.42              |
| 1:A:463:LEU:HB3  | 1:A:881:ILE:HD14 | 2.02                     | 0.42              |
| 2:X:7:C:H2'      | 2:X:8:G:H8       | 1.85                     | 0.42              |
| 1:A:583:ALA:O    | 1:A:602:ALA:HB1  | 2.19                     | 0.41              |
| 1:A:700:LYS:HB3  | 1:A:807:TYR:HE1  | 1.84                     | 0.41              |
| 1:A:726:LYS:O    | 3:Y:6:U:H4'      | 2.21                     | 0.41              |
| 1:A:885:LYS:O    | 1:A:889:LYS:HG2  | 2.20                     | 0.41              |
| 1:A:751:ALA:HA   | 1:A:783:ILE:HG23 | 2.02                     | 0.41              |
| 1:A:870:ALA:O    | 1:A:874:LEU:HG   | 2.21                     | 0.41              |
| 1:A:750:LYS:O    | 1:A:785:LEU:HD23 | 2.21                     | 0.41              |
| 1:A:764:LYS:O    | 1:A:764:LYS:HD3  | 2.20                     | 0.40              |
| 1:A:899:ASN:H    | 1:A:1008:ILE:HA  | 1.86                     | 0.40              |
| 1:A:394:ASP:OD1  | 1:A:395:THR:N    | 2.55                     | 0.40              |

There are no symmetry-related clashes.

## 5.3 Torsion angles [i](#)

### 5.3.1 Protein backbone [i](#)

In the following table, the Percentiles column shows the percent Ramachandran outliers of the chain as a percentile score with respect to all PDB entries followed by that with respect to all EM entries.

The Analysed column shows the number of residues for which the backbone conformation was analysed, and the total number of residues.

| Mol | Chain | Analysed      | Favoured  | Allowed  | Outliers | Percentiles |
|-----|-------|---------------|-----------|----------|----------|-------------|
| 1   | A     | 621/693 (90%) | 542 (87%) | 79 (13%) | 0        | 100 100     |

There are no Ramachandran outliers to report.

### 5.3.2 Protein sidechains [i](#)

In the following table, the Percentiles column shows the percent sidechain outliers of the chain as a percentile score with respect to all PDB entries followed by that with respect to all EM entries.

The Analysed column shows the number of residues for which the sidechain conformation was analysed, and the total number of residues.

| Mol | Chain | Analysed      | Rotameric | Outliers | Percentiles |
|-----|-------|---------------|-----------|----------|-------------|
| 1   | A     | 571/622 (92%) | 565 (99%) | 6 (1%)   | 76 88       |

All (6) residues with a non-rotameric sidechain are listed below:

| Mol | Chain | Res | Type |
|-----|-------|-----|------|
| 1   | A     | 456 | ASN  |
| 1   | A     | 534 | LYS  |
| 1   | A     | 606 | ARG  |
| 1   | A     | 741 | ASN  |
| 1   | A     | 750 | LYS  |
| 1   | A     | 990 | ASN  |

Some sidechains can be flipped to improve hydrogen bonding and reduce clashes. All (7) such sidechains are listed below:

| Mol | Chain | Res | Type |
|-----|-------|-----|------|
| 1   | A     | 513 | ASN  |
| 1   | A     | 683 | ASN  |

*Continued on next page...*

Continued from previous page...

| Mol | Chain | Res | Type |
|-----|-------|-----|------|
| 1   | A     | 741 | ASN  |
| 1   | A     | 784 | ASN  |
| 1   | A     | 897 | ASN  |
| 1   | A     | 899 | ASN  |
| 1   | A     | 990 | ASN  |

### 5.3.3 RNA [i](#)

| Mol | Chain | Analysed    | Backbone Outliers | Pucker Outliers |
|-----|-------|-------------|-------------------|-----------------|
| 2   | X     | 14/15 (93%) | 1 (7%)            | 0               |
| 3   | Y     | 14/15 (93%) | 0                 | 0               |
| All | All   | 28/30 (93%) | 1 (3%)            | 0               |

All (1) RNA backbone outliers are listed below:

| Mol | Chain | Res | Type |
|-----|-------|-----|------|
| 2   | X     | 15  | G    |

There are no RNA pucker outliers to report.

## 5.4 Non-standard residues in protein, DNA, RNA chains [i](#)

There are no non-standard protein/DNA/RNA residues in this entry.

## 5.5 Carbohydrates [i](#)

There are no carbohydrates in this entry.

## 5.6 Ligand geometry [i](#)

Of 1 ligands modelled in this entry, 1 is monoatomic - leaving 0 for Mogul analysis.

There are no bond length outliers.

There are no bond angle outliers.

There are no chirality outliers.

There are no torsion outliers.

There are no ring outliers.

No monomer is involved in short contacts.

### 5.7 Other polymers [i](#)

There are no such residues in this entry.

### 5.8 Polymer linkage issues [i](#)

There are no chain breaks in this entry.

CONFIDENTIAL VALIDATION REPORT



# Full wwPDB/EMDatabank EM Map/Model Validation Report ⓘ

Apr 4, 2018 – 10:25 AM BST

PDB ID : 6G1X  
EMDB ID: : EMD-4341  
Title : CryoEM structure of the MDA5-dsRNA filament with 91-degree helical twist  
Deposited on : 2018-03-22  
Resolution : 3.93 Å(reported)

This is a Full wwPDB/EMDatabank EM Map/Model Validation Report.

This report is produced by the wwPDB biocuration pipeline after annotation of the structure.

We welcome your comments at [validation@mail.wwpdb.org](mailto:validation@mail.wwpdb.org)

A user guide is available at

<https://www.wwpdb.org/validation/2017/EMValidationReportHelp>

with specific help available everywhere you see the ⓘ symbol.

---

MolProbity : 4.02b-467  
Percentile statistics : 20171227.v01 (using entries in the PDB archive December 27th 2017)  
Ideal geometry (proteins) : Engh & Huber (2001)  
Ideal geometry (DNA, RNA) : Parkinson et. al. (1996)  
Validation Pipeline (wwPDB-VP) : rb-20031021

# 1 Overall quality at a glance i

The following experimental techniques were used to determine the structure:  
*ELECTRON MICROSCOPY*

The reported resolution of this entry is 3.93 Å.

Percentile scores (ranging between 0-100) for global validation metrics of the entry are shown in the following graphic. The table shows the number of entries on which the scores are based.

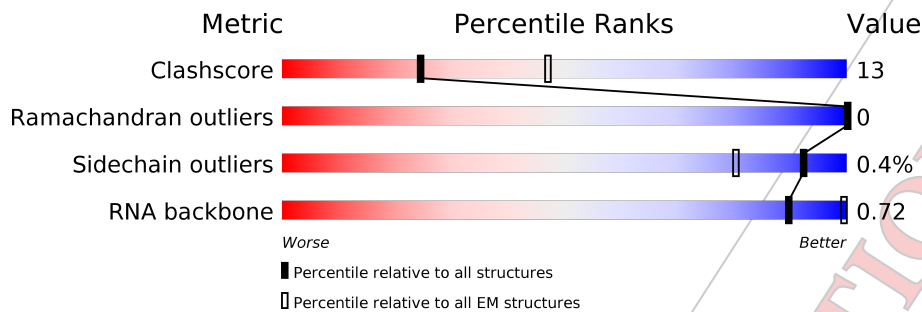

| Metric                | Whole archive (#Entries) | EM structures (#Entries) |
|-----------------------|--------------------------|--------------------------|
| Clashscore            | 136327                   | 1886                     |
| Ramachandran outliers | 132723                   | 1663                     |
| Sidechain outliers    | 132532                   | 1531                     |
| RNA backbone          | 3747                     | 458                      |

The table below summarises the geometric issues observed across the polymeric chains. The red, orange, yellow and green segments on the bar indicate the fraction of residues that contain outliers for  $\geq 3$ , 2, 1 and 0 types of geometric quality criteria. A grey segment represents the fraction of residues that are not modelled. The numeric value for each fraction is indicated below the corresponding segment, with a dot representing fractions  $\leq 5\%$

| Mol | Chain | Length | Quality of chain                     |
|-----|-------|--------|--------------------------------------|
| 1   | A     | 696    | 71% (green), 22% (yellow), 7% (grey) |
| 2   | X     | 15     | 93% (yellow), 7% (orange)            |
| 3   | Y     | 15     | 100% (yellow)                        |

## 2 Entry composition i

There are 4 unique types of molecules in this entry. The entry contains 9989 atoms, of which 4182 are hydrogens and 0 are deuteriums.

In the tables below, the AltConf column contains the number of residues with at least one atom in alternate conformation and the Trace column contains the number of residues modelled with at most 2 atoms.

- Molecule 1 is a protein called Interferon-induced helicase C domain-containing protein 1.

| Mol | Chain | Residues | Atoms |      |      |     |     |    | AltConf | Trace |
|-----|-------|----------|-------|------|------|-----|-----|----|---------|-------|
|     |       |          | Total | C    | H    | N   | O   | S  |         |       |
| 1   | A     | 648      | 9349  | 3287 | 4182 | 896 | 949 | 35 | 0       | 0     |

There are 18 discrepancies between the modelled and reference sequences:

| Chain | Residue | Modelled | Actual | Comment  | Reference  |
|-------|---------|----------|--------|----------|------------|
| A     | ?       | -        | ASP    | deletion | UNP Q8R5F7 |
| A     | ?       | -        | LYS    | deletion | UNP Q8R5F7 |
| A     | ?       | -        | SER    | deletion | UNP Q8R5F7 |
| A     | ?       | -        | ASP    | deletion | UNP Q8R5F7 |
| A     | ?       | -        | ASP    | deletion | UNP Q8R5F7 |
| A     | ?       | -        | GLU    | deletion | UNP Q8R5F7 |
| A     | ?       | -        | ALA    | deletion | UNP Q8R5F7 |
| A     | ?       | -        | SER    | deletion | UNP Q8R5F7 |
| A     | ?       | -        | SER    | deletion | UNP Q8R5F7 |
| A     | ?       | -        | CYS    | deletion | UNP Q8R5F7 |
| A     | ?       | -        | ASN    | deletion | UNP Q8R5F7 |
| A     | ?       | -        | ASP    | deletion | UNP Q8R5F7 |
| A     | ?       | -        | GLN    | deletion | UNP Q8R5F7 |
| A     | ?       | -        | LEU    | deletion | UNP Q8R5F7 |
| A     | ?       | -        | LYS    | deletion | UNP Q8R5F7 |
| A     | ?       | -        | GLY    | deletion | UNP Q8R5F7 |
| A     | ?       | -        | ASP    | deletion | UNP Q8R5F7 |
| A     | ?       | -        | VAL    | deletion | UNP Q8R5F7 |

- Molecule 2 is a RNA chain called RNA (5'-R(P\*UP\*CP\*CP\*AP\*UP\*GP\*CP\*GP\*CP\*AP\*UP\*GP\*AP\*CP\*G)-3').

| Mol | Chain | Residues | Atoms |     |    |     |    | AltConf | Trace |
|-----|-------|----------|-------|-----|----|-----|----|---------|-------|
|     |       |          | Total | C   | N  | O   | P  |         |       |
| 2   | X     | 15       | 318   | 142 | 56 | 105 | 15 | 0       | 0     |

- Molecule 3 is a RNA chain called RNA (5'-R(P\*CP\*GP\*UP\*CP\*AP\*UP\*GP\*CP\*GP\*CP



\*AP\*UP\*GP\*GP\*A)-3').

| Mol | Chain | Residues | Atoms |     |    |     |    | AltConf | Trace |
|-----|-------|----------|-------|-----|----|-----|----|---------|-------|
|     |       |          | Total | C   | N  | O   | P  |         |       |
| 3   | Y     | 15       | 321   | 143 | 58 | 105 | 15 | 0       | 0     |

- Molecule 4 is ZINC ION (three-letter code: ZN) (formula: Zn).

| Mol | Chain | Residues | Atoms |    | AltConf |
|-----|-------|----------|-------|----|---------|
|     |       |          | Total | Zn |         |
| 4   | A     | 1        | 1     | 1  | 0       |

CONFIDENTIAL VALIDATION REPORT

### 3 Residue-property plots

These plots are drawn for all protein, RNA and DNA chains in the entry. The first graphic for a chain summarises the proportions of the various outlier classes displayed in the second graphic. The second graphic shows the sequence view annotated by issues in geometry. Residues are color-coded according to the number of geometric quality criteria for which they contain at least one outlier: green = 0, yellow = 1, orange = 2 and red = 3 or more. Stretches of two or more consecutive residues without any outlier are shown as a green connector. Residues present in the sample, but not in the model, are shown in grey.

- Molecule 1: Interferon-induced helicase C domain-containing protein 1

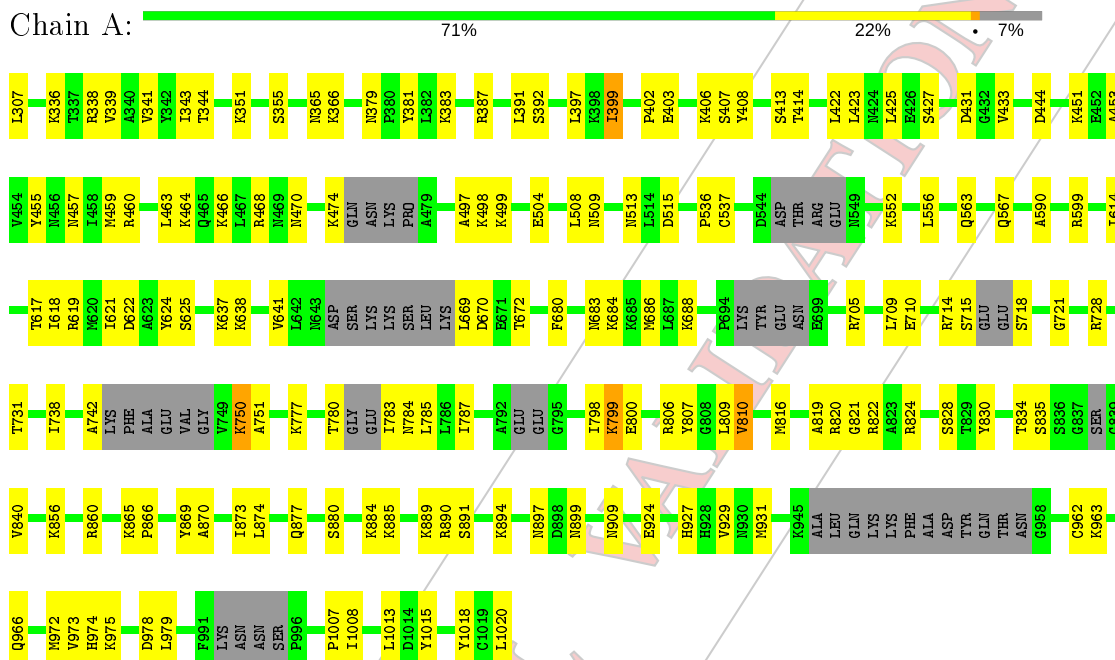

## 4 Experimental information [i](#)

| Property                           | Value                                                 | Source    |
|------------------------------------|-------------------------------------------------------|-----------|
| Reconstruction method              | HELICAL                                               | Depositor |
| Imposed symmetry                   | HELICAL, twist=90.9214°, rise=44.9703 Å, axial sym=C1 | Depositor |
| Number of segments used            | 39987                                                 | Depositor |
| Resolution determination method    | FSC 0.143 CUT-OFF                                     | Depositor |
| CTF correction method              | PHASE FLIPPING AND AMPLITUDE CORRECTION               | Depositor |
| Microscope                         | FEI TITAN KRIOS                                       | Depositor |
| Voltage (kV)                       | 300                                                   | Depositor |
| Electron dose ( $e^-/\text{Å}^2$ ) | 29.85                                                 | Depositor |
| Minimum defocus (nm)               | 1800                                                  | Depositor |
| Maximum defocus (nm)               | 2700                                                  | Depositor |
| Magnification                      | 75000                                                 | Depositor |
| Image detector                     | FEI FALCON III (4k x 4k)                              | Depositor |

CONFIDENTIAL

VALIDATION REPORT

## 5 Model quality i

### 5.1 Standard geometry i

Bond lengths and bond angles in the following residue types are not validated in this section:  
ZN

The Z score for a bond length (or angle) is the number of standard deviations the observed value is removed from the expected value. A bond length (or angle) with  $|Z| > 5$  is considered an outlier worth inspection. RMSZ is the root-mean-square of all Z scores of the bond lengths (or angles).

| Mol | Chain | Bond lengths |         | Bond angles |               |
|-----|-------|--------------|---------|-------------|---------------|
|     |       | RMSZ         | # Z  >2 | RMSZ        | # Z  >2       |
| 1   | A     | 0.55         | 0/5242  | 0.62        | 2/7039 (0.0%) |
| 2   | X     | 0.95         | 0/354   | 0.99        | 0/549         |
| 3   | Y     | 0.94         | 0/358   | 0.88        | 0/556         |
| All | All   | 0.61         | 0/5954  | 0.67        | 2/8144 (0.0%) |

Chiral center outliers are detected by calculating the chiral volume of a chiral center and verifying if the center is modelled as a planar moiety or with the opposite hand. A planarity outlier is detected by checking planarity of atoms in a peptide group, atoms in a mainchain group or atoms of a sidechain that are expected to be planar.

| Mol | Chain | #Chirality outliers | #Planarity outliers |
|-----|-------|---------------------|---------------------|
| 1   | A     | 0                   | 1                   |

There are no bond length outliers.

All (2) bond angle outliers are listed below:

| Mol | Chain | Res | Type | Atoms  | Z    | Observed(°) | Ideal(°) |
|-----|-------|-----|------|--------|------|-------------|----------|
| 1   | A     | 497 | ALA  | C-N-CA | 6.12 | 137.00      | 121.70   |
| 1   | A     | 399 | ILE  | C-N-CA | 5.75 | 136.06      | 121.70   |

There are no chirality outliers.

All (1) planarity outliers are listed below:

| Mol | Chain | Res | Type | Group   |
|-----|-------|-----|------|---------|
| 1   | A     | 810 | VAL  | Peptide |

## 5.2 Too-close contacts (i)

In the following table, the Non-H and H(model) columns list the number of non-hydrogen atoms and hydrogen atoms in the chain respectively. The H(added) column lists the number of hydrogen atoms added and optimized by MolProbity. The Clashes column lists the number of clashes within the asymmetric unit, whereas Symm-Clashes lists symmetry related clashes.

| Mol | Chain | Non-H | H(model) | H(added) | Clashes | Symm-Clashes |
|-----|-------|-------|----------|----------|---------|--------------|
| 1   | A     | 5167  | 4182     | 5287     | 107     | 0            |
| 2   | X     | 318   | 0        | 163      | 23      | 0            |
| 3   | Y     | 321   | 0        | 163      | 22      | 0            |
| 4   | A     | 1     | 0        | 0        | 0       | 0            |
| All | All   | 5807  | 4182     | 5613     | 146     | 0            |

The all-atom clashscore is defined as the number of clashes found per 1000 atoms (including hydrogen atoms). The all-atom clashscore for this structure is 13.

All (146) close contacts within the same asymmetric unit are listed below, sorted by their clash magnitude.

| Atom-1           | Atom-2           | Interatomic distance (Å) | Clash overlap (Å) |
|------------------|------------------|--------------------------|-------------------|
| 2:X:3:C:H2'      | 2:X:4:A:H8       | 1.42                     | 0.83              |
| 1:A:444:ASP:O    | 1:A:455:TYR:OH   | 2.01                     | 0.78              |
| 1:A:599:ARG:NH1  | 1:A:909:ASN:OD1  | 2.18                     | 0.77              |
| 1:A:777:LYS:O    | 1:A:780:THR:OG1  | 2.05                     | 0.74              |
| 1:A:909:ASN:ND2  | 1:A:966:GLN:OE1  | 2.20                     | 0.73              |
| 1:A:974:HIS:HB3  | 1:A:975:LYS:HD2  | 1.71                     | 0.73              |
| 1:A:821:GLY:O    | 1:A:824:ARG:NE   | 2.17                     | 0.72              |
| 1:A:351:LYS:O    | 1:A:355:SER:N    | 2.22                     | 0.72              |
| 2:X:9:C:H2'      | 2:X:10:A:H8      | 1.54                     | 0.71              |
| 1:A:423:LEU:O    | 1:A:427:SER:N    | 2.20                     | 0.70              |
| 2:X:9:C:H2'      | 2:X:10:A:C8      | 2.27                     | 0.69              |
| 1:A:715:SER:O    | 1:A:718:SER:N    | 2.24                     | 0.69              |
| 2:X:5:U:H2'      | 2:X:6:G:H8       | 1.57                     | 0.69              |
| 1:A:341:VAL:O    | 1:A:344:THR:OG1  | 2.11                     | 0.68              |
| 3:Y:1:C:H2'      | 3:Y:2:G:H8       | 1.58                     | 0.67              |
| 1:A:751:ALA:HB2  | 1:A:785:LEU:HD21 | 1.76                     | 0.67              |
| 1:A:810:VAL:HG21 | 2:X:13:A:H5'     | 1.77                     | 0.67              |
| 2:X:3:C:H2'      | 2:X:4:A:C8       | 2.29                     | 0.67              |
| 1:A:824:ARG:O    | 1:A:828:SER:OG   | 2.14                     | 0.66              |
| 3:Y:1:C:H2'      | 3:Y:2:G:C8       | 2.30                     | 0.66              |
| 1:A:891:SER:HA   | 1:A:894:LYS:HG2  | 1.76                     | 0.66              |
| 3:Y:3:U:H2'      | 3:Y:4:C:H6       | 1.61                     | 0.65              |
| 2:X:5:U:H2'      | 2:X:6:G:C8       | 2.32                     | 0.65              |

*Continued on next page...*

Continued from previous page...

| Atom-1           | Atom-2            | Interatomic distance (Å) | Clash overlap (Å) |
|------------------|-------------------|--------------------------|-------------------|
| 3:Y:4:C:H2'      | 3:Y:5:A:C8        | 2.31                     | 0.65              |
| 1:A:336:LYS:NZ   | 1:A:444:ASP:OD1   | 2.30                     | 0.64              |
| 3:Y:8:C:H2'      | 3:Y:9:G:H8        | 1.62                     | 0.64              |
| 3:Y:4:C:H2'      | 3:Y:5:A:H8        | 1.63                     | 0.64              |
| 1:A:927:HIS:NE2  | 2:X:5:U:O2'       | 2.28                     | 0.63              |
| 1:A:614:ILE:O    | 1:A:618:ILE:N     | 2.30                     | 0.63              |
| 1:A:617:THR:O    | 1:A:807:TYR:OH    | 2.16                     | 0.63              |
| 1:A:806:ARG:HD2  | 1:A:809:LEU:CD2   | 2.29                     | 0.62              |
| 1:A:897:ASN:HB2  | 1:A:1007:PRO:HG2  | 1.80                     | 0.62              |
| 1:A:453:ALA:HB2  | 2:X:10:A:H5'      | 1.81                     | 0.62              |
| 3:Y:10:C:O2'     | 3:Y:11:A:H5'      | 2.00                     | 0.62              |
| 1:A:379:ASN:O    | 1:A:383:LYS:N     | 2.32                     | 0.62              |
| 1:A:464:LYS:HE2  | 1:A:468:ARG:HH21  | 1.66                     | 0.61              |
| 1:A:834:THR:HG21 | 1:A:840:VAL:HG21  | 1.82                     | 0.61              |
| 1:A:865:LYS:HD2  | 1:A:866:PRO:HD2   | 1.83                     | 0.61              |
| 1:A:425:LEU:HB2  | 1:A:433:VAL:H     | 1.66                     | 0.60              |
| 1:A:339:VAL:O    | 1:A:343:ILE:HD12  | 2.00                     | 0.60              |
| 3:Y:8:C:H2'      | 3:Y:9:G:C8        | 2.37                     | 0.60              |
| 1:A:806:ARG:HD2  | 1:A:809:LEU:HD23  | 1.83                     | 0.59              |
| 3:Y:3:U:H2'      | 3:Y:4:C:C6        | 2.38                     | 0.59              |
| 1:A:590:ALA:HB3  | 1:A:599:ARG:HB3   | 1.85                     | 0.59              |
| 1:A:619:ARG:HG3  | 1:A:621:ILE:HG22  | 1.85                     | 0.59              |
| 2:X:8:G:O2'      | 2:X:9:C:H5'       | 2.03                     | 0.58              |
| 2:X:7:C:H2'      | 2:X:8:G:H8        | 1.68                     | 0.58              |
| 2:X:12:G:H2'     | 2:X:13:A:H8       | 1.70                     | 0.57              |
| 1:A:451:LYS:HD2  | 1:A:880:SER:HA    | 1.87                     | 0.57              |
| 1:A:683:ASN:O    | 1:A:686:MET:HG2   | 2.05                     | 0.56              |
| 1:A:307:LEU:HB3  | 1:A:381:TYR:CD2   | 2.40                     | 0.56              |
| 1:A:402:PRO:HG2  | 1:A:431:ASP:HB3   | 1.88                     | 0.56              |
| 3:Y:7:G:O2'      | 3:Y:8:C:H5'       | 2.06                     | 0.56              |
| 2:X:7:C:H2'      | 2:X:8:G:C8        | 2.40                     | 0.55              |
| 2:X:12:G:H2'     | 2:X:13:A:C8       | 2.42                     | 0.55              |
| 1:A:798:ILE:HB   | 1:A:822:ARG:HD2   | 1.87                     | 0.55              |
| 1:A:890:ARG:O    | 1:A:894:LYS:HG2   | 2.07                     | 0.55              |
| 1:A:459:MET:O    | 1:A:463:LEU:HG    | 2.07                     | 0.55              |
| 1:A:1018:TYR:O   | 1:A:1020:LEU:HD12 | 2.07                     | 0.55              |
| 1:A:891:SER:HA   | 1:A:894:LYS:CG    | 2.37                     | 0.55              |
| 1:A:710:GLU:O    | 1:A:714:ARG:HG3   | 2.06                     | 0.55              |
| 1:A:413:SER:OG   | 1:A:414:THR:N     | 2.40                     | 0.54              |
| 2:X:4:A:O2'      | 2:X:5:U:H5'       | 2.07                     | 0.54              |
| 1:A:536:PRO:HB2  | 1:A:828:SER:HB2   | 1.88                     | 0.54              |

Continued on next page...

Continued from previous page...

| Atom-1           | Atom-2           | Interatomic distance (Å) | Clash overlap (Å) |
|------------------|------------------|--------------------------|-------------------|
| 1:A:515:ASP:OD1  | 1:A:877:GLN:NE2  | 2.40                     | 0.54              |
| 1:A:622:ASP:O    | 1:A:625:SER:OG   | 2.21                     | 0.53              |
| 3:Y:14:G:H2'     | 3:Y:15:A:H8      | 1.71                     | 0.53              |
| 1:A:962:CYS:HB3  | 1:A:966:GLN:N    | 2.23                     | 0.53              |
| 1:A:728:ARG:NH2  | 3:Y:7:G:OP2      | 2.41                     | 0.53              |
| 1:A:975:LYS:HG2  | 1:A:1015:TYR:OH  | 2.08                     | 0.53              |
| 1:A:509:ASN:O    | 1:A:513:ASN:ND2  | 2.42                     | 0.53              |
| 1:A:624:TYR:CE2  | 1:A:688:LYS:HD2  | 2.44                     | 0.53              |
| 1:A:806:ARG:HG3  | 1:A:830:TYR:OH   | 2.09                     | 0.53              |
| 1:A:399:ILE:HD11 | 1:A:403:GLU:HG3  | 1.91                     | 0.52              |
| 3:Y:3:U:O2'      | 3:Y:4:C:H5'      | 2.10                     | 0.52              |
| 1:A:552:LYS:HG2  | 1:A:556:LEU:CD1  | 2.40                     | 0.52              |
| 1:A:391:LEU:O    | 1:A:392:SER:OG   | 2.25                     | 0.51              |
| 1:A:731:THR:HG22 | 1:A:787:ILE:HG22 | 1.91                     | 0.51              |
| 2:X:6:G:O2'      | 2:X:7:C:H5'      | 2.10                     | 0.51              |
| 1:A:637:LYS:O    | 1:A:641:VAL:HG23 | 2.11                     | 0.51              |
| 1:A:422:LEU:O    | 1:A:425:LEU:HB3  | 2.11                     | 0.51              |
| 1:A:738:ILE:HG23 | 1:A:742:ALA:HB3  | 1.93                     | 0.50              |
| 1:A:924:GLU:OE1  | 3:Y:12:U:O2'     | 2.22                     | 0.50              |
| 3:Y:14:G:H2'     | 3:Y:15:A:C8      | 2.47                     | 0.50              |
| 1:A:929:VAL:HG21 | 1:A:979:LEU:HB3  | 1.93                     | 0.50              |
| 1:A:563:GLN:O    | 1:A:567:GLN:N    | 2.44                     | 0.50              |
| 1:A:870:ALA:O    | 1:A:874:LEU:HG   | 2.12                     | 0.49              |
| 1:A:962:CYS:SG   | 1:A:963:LYS:N    | 2.85                     | 0.49              |
| 2:X:1:U:H2'      | 2:X:2:C:H6       | 1.77                     | 0.49              |
| 3:Y:6:U:H2'      | 3:Y:7:G:C8       | 2.48                     | 0.49              |
| 1:A:721:GLY:N    | 1:A:784:ASN:O    | 2.46                     | 0.48              |
| 3:Y:14:G:O2'     | 3:Y:15:A:H5'     | 2.13                     | 0.48              |
| 3:Y:2:G:O2'      | 3:Y:3:U:H5'      | 2.14                     | 0.48              |
| 3:Y:6:U:H2'      | 3:Y:7:G:H8       | 1.78                     | 0.48              |
| 1:A:464:LYS:HE2  | 1:A:468:ARG:NH2  | 2.29                     | 0.48              |
| 1:A:466:LYS:NZ   | 1:A:515:ASP:OD2  | 2.35                     | 0.47              |
| 1:A:619:ARG:CG   | 1:A:621:ILE:HG22 | 2.45                     | 0.47              |
| 1:A:624:TYR:CZ   | 1:A:688:LYS:HD2  | 2.50                     | 0.47              |
| 3:Y:13:G:O2'     | 3:Y:14:G:H5'     | 2.14                     | 0.47              |
| 1:A:457:ASN:OD1  | 1:A:460:ARG:NH2  | 2.48                     | 0.47              |
| 1:A:670:ASP:CG   | 1:A:672:THR:HG1  | 2.16                     | 0.47              |
| 1:A:810:VAL:HG21 | 2:X:12:G:O2'     | 2.15                     | 0.47              |
| 2:X:3:C:O2'      | 2:X:4:A:H5'      | 2.15                     | 0.47              |
| 1:A:972:MET:HG2  | 1:A:974:HIS:HD2  | 1.81                     | 0.46              |
| 2:X:1:U:H2'      | 2:X:2:C:C6       | 2.50                     | 0.46              |

Continued on next page...

Continued from previous page...

| Atom-1           | Atom-2            | Interatomic distance (Å) | Clash overlap (Å) |
|------------------|-------------------|--------------------------|-------------------|
| 1:A:470:ASN:O    | 1:A:474:LYS:N     | 2.44                     | 0.46              |
| 2:X:11:U:H2'     | 2:X:12:G:C8       | 2.50                     | 0.46              |
| 1:A:504:GLU:O    | 1:A:508:LEU:HD23  | 2.16                     | 0.46              |
| 3:Y:9:G:H2'      | 3:Y:10:C:H6       | 1.79                     | 0.46              |
| 1:A:387:ARG:NH1  | 1:A:407:SER:OG    | 2.48                     | 0.46              |
| 1:A:799:LYS:HD2  | 1:A:800:GLU:HB2   | 1.97                     | 0.46              |
| 1:A:537:CYS:O    | 1:A:820:ARG:NH2   | 2.49                     | 0.45              |
| 2:X:14:C:H2'     | 2:X:15:G:C8       | 2.50                     | 0.45              |
| 1:A:705:ARG:HG2  | 1:A:709:LEU:HD12  | 1.97                     | 0.45              |
| 3:Y:5:A:O2'      | 3:Y:6:U:H5'       | 2.15                     | 0.45              |
| 1:A:391:LEU:HD13 | 1:A:397:LEU:HD22  | 1.99                     | 0.45              |
| 1:A:365:ASN:OD1  | 1:A:366:LYS:N     | 2.50                     | 0.45              |
| 1:A:816:MET:O    | 1:A:820:ARG:HG2   | 2.17                     | 0.45              |
| 1:A:973:VAL:HG22 | 1:A:978:ASP:OD1   | 2.17                     | 0.45              |
| 1:A:425:LEU:HD22 | 1:A:433:VAL:O     | 2.17                     | 0.44              |
| 1:A:777:LYS:CB   | 1:A:783:ILE:HD12  | 2.48                     | 0.44              |
| 1:A:899:ASN:H    | 1:A:1008:ILE:HA   | 1.81                     | 0.44              |
| 1:A:806:ARG:HD2  | 1:A:809:LEU:HD22  | 1.99                     | 0.44              |
| 1:A:931:MET:CE   | 1:A:1013:LEU:HD11 | 2.48                     | 0.44              |
| 1:A:728:ARG:O    | 1:A:731:THR:OG1   | 2.21                     | 0.43              |
| 1:A:856:LYS:O    | 1:A:860:ARG:HG3   | 2.19                     | 0.43              |
| 1:A:869:TYR:O    | 1:A:873:ILE:HG12  | 2.19                     | 0.43              |
| 1:A:403:GLU:O    | 1:A:407:SER:N     | 2.52                     | 0.42              |
| 1:A:806:ARG:HH21 | 1:A:819:ALA:CB    | 2.32                     | 0.42              |
| 1:A:638:LYS:HE2  | 1:A:669:LEU:HD23  | 2.01                     | 0.42              |
| 1:A:750:LYS:HD2  | 1:A:750:LYS:H     | 1.85                     | 0.42              |
| 1:A:806:ARG:HH22 | 1:A:816:MET:HA    | 1.84                     | 0.42              |
| 2:X:10:A:O2'     | 2:X:11:U:H5'      | 2.19                     | 0.42              |
| 1:A:407:SER:OG   | 1:A:408:TYR:N     | 2.53                     | 0.42              |
| 1:A:498:LYS:HG3  | 1:A:499:LYS:HG3   | 2.02                     | 0.42              |
| 1:A:338:ARG:HD2  | 1:A:381:TYR:HE2   | 1.85                     | 0.41              |
| 1:A:899:ASN:HB2  | 1:A:1008:ILE:CG2  | 2.50                     | 0.41              |
| 1:A:873:ILE:O    | 1:A:877:GLN:HG3   | 2.19                     | 0.41              |
| 1:A:460:ARG:HE   | 1:A:884:LYS:HD2   | 1.84                     | 0.41              |
| 1:A:834:THR:HG22 | 1:A:835:SER:O     | 2.21                     | 0.41              |
| 1:A:785:LEU:HD23 | 1:A:785:LEU:H     | 1.85                     | 0.41              |
| 1:A:402:PRO:O    | 1:A:406:LYS:HG3   | 2.21                     | 0.40              |
| 1:A:751:ALA:CB   | 1:A:785:LEU:HD21  | 2.46                     | 0.40              |
| 1:A:777:LYS:HB3  | 1:A:783:ILE:HD12  | 2.03                     | 0.40              |
| 1:A:885:LYS:O    | 1:A:889:LYS:HG2   | 2.21                     | 0.40              |
| 1:A:680:PHE:HE2  | 1:A:684:LYS:HD3   | 1.87                     | 0.40              |



There are no symmetry-related clashes.

### 5.3 Torsion angles [i](#)

#### 5.3.1 Protein backbone [i](#)

In the following table, the Percentiles column shows the percent Ramachandran outliers of the chain as a percentile score with respect to all PDB entries followed by that with respect to all EM entries.

The Analysed column shows the number of residues for which the backbone conformation was analysed, and the total number of residues.

| Mol | Chain | Analysed      | Favoured  | Allowed  | Outliers | Percentiles |
|-----|-------|---------------|-----------|----------|----------|-------------|
| 1   | A     | 624/696 (90%) | 545 (87%) | 79 (13%) | 0        | 100 100     |

There are no Ramachandran outliers to report.

#### 5.3.2 Protein sidechains [i](#)

In the following table, the Percentiles column shows the percent sidechain outliers of the chain as a percentile score with respect to all PDB entries followed by that with respect to all EM entries.

The Analysed column shows the number of residues for which the sidechain conformation was analysed, and the total number of residues.

| Mol | Chain | Analysed      | Rotameric  | Outliers | Percentiles |
|-----|-------|---------------|------------|----------|-------------|
| 1   | A     | 571/625 (91%) | 569 (100%) | 2 (0%)   | 92 96       |

All (2) residues with a non-rotameric sidechain are listed below:

| Mol | Chain | Res | Type |
|-----|-------|-----|------|
| 1   | A     | 750 | LYS  |
| 1   | A     | 799 | LYS  |

Some sidechains can be flipped to improve hydrogen bonding and reduce clashes. All (5) such sidechains are listed below:

| Mol | Chain | Res | Type |
|-----|-------|-----|------|
| 1   | A     | 379 | ASN  |
| 1   | A     | 513 | ASN  |
| 1   | A     | 711 | GLN  |

*Continued on next page...*

*Continued from previous page...*

| Mol | Chain | Res | Type |
|-----|-------|-----|------|
| 1   | A     | 859 | ASN  |
| 1   | A     | 974 | HIS  |

### 5.3.3 RNA [i](#)

| Mol | Chain | Analysed    | Backbone Outliers | Pucker Outliers |
|-----|-------|-------------|-------------------|-----------------|
| 2   | X     | 14/15 (93%) | 1 (7%)            | 0               |
| 3   | Y     | 14/15 (93%) | 0                 | 0               |
| All | All   | 28/30 (93%) | 1 (3%)            | 0               |

All (1) RNA backbone outliers are listed below:

| Mol | Chain | Res | Type |
|-----|-------|-----|------|
| 2   | X     | 15  | G    |

There are no RNA pucker outliers to report.

## 5.4 Non-standard residues in protein, DNA, RNA chains [i](#)

There are no non-standard protein/DNA/RNA residues in this entry.

## 5.5 Carbohydrates [i](#)

There are no carbohydrates in this entry.

## 5.6 Ligand geometry [i](#)

Of 1 ligands modelled in this entry, 1 is monoatomic - leaving 0 for Mogul analysis.

There are no bond length outliers.

There are no bond angle outliers.

There are no chirality outliers.

There are no torsion outliers.

There are no ring outliers.

No monomer is involved in short contacts.

## 5.7 Other polymers [i](#)

There are no such residues in this entry.

## 5.8 Polymer linkage issues [i](#)

There are no chain breaks in this entry.

CONFIDENTIAL VALIDATION REPORT



# Full wwPDB/EMDatabank EM Map/Model Validation Report ⓘ

May 17, 2018 – 08:51 PM BST

PDB ID : 6GJZ  
EMDB ID: : EMD-0012  
Title : CryoEM structure of the MDA5-dsRNA filament in complex with AMPPNP  
Deposited on : 2018-05-17  
Resolution : 4.06 Å(reported)

This is a Full wwPDB/EMDatabank EM Map/Model Validation Report.

This report is produced by the wwPDB biocuration pipeline after annotation of the structure.

We welcome your comments at [validation@mail.wwpdb.org](mailto:validation@mail.wwpdb.org)

A user guide is available at

<https://www.wwpdb.org/validation/2017/EMValidationReportHelp>

with specific help available everywhere you see the ⓘ symbol.

---

MolProbity : 4.02b-467  
Mogul : 1.7.3 (157068), CSD as539be (2018)  
Percentile statistics : 20171227.v01 (using entries in the PDB archive December 27th 2017)  
Ideal geometry (proteins) : Engh & Huber (2001)  
Ideal geometry (DNA, RNA) : Parkinson et. al. (1996)  
Validation Pipeline (wwPDB-VP) : rb-20031021

# 1 Overall quality at a glance i

The following experimental techniques were used to determine the structure:  
*ELECTRON MICROSCOPY*

The reported resolution of this entry is 4.06 Å.

Percentile scores (ranging between 0-100) for global validation metrics of the entry are shown in the following graphic. The table shows the number of entries on which the scores are based.

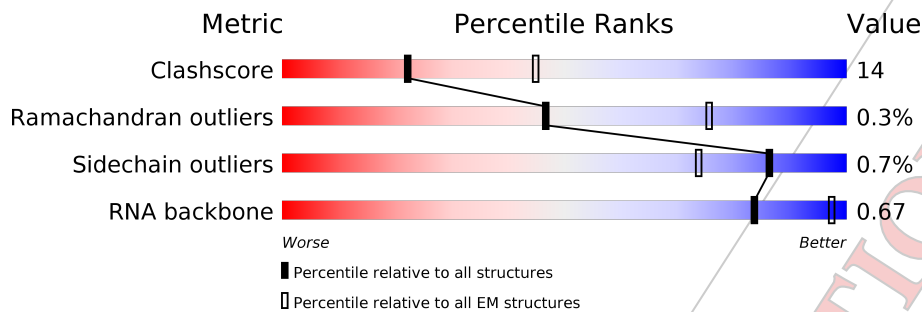

| Metric                | Whole archive (#Entries) | EM structures (#Entries) |
|-----------------------|--------------------------|--------------------------|
| Clashscore            | 136327                   | 1886                     |
| Ramachandran outliers | 132723                   | 1663                     |
| Sidechain outliers    | 132532                   | 1531                     |
| RNA backbone          | 3747                     | 458                      |

The table below summarises the geometric issues observed across the polymeric chains. The red, orange, yellow and green segments on the bar indicate the fraction of residues that contain outliers for  $\geq 3$ , 2, 1 and 0 types of geometric quality criteria. A grey segment represents the fraction of residues that are not modelled. The numeric value for each fraction is indicated below the corresponding segment, with a dot representing fractions  $\leq 5\%$

| Mol | Chain | Length | Quality of chain                      |
|-----|-------|--------|---------------------------------------|
| 1   | A     | 1007   | 52% (green), 14% (yellow), 32% (grey) |
| 2   | X     | 14     | 100% (yellow)                         |
| 3   | Y     | 14     | 7% (green), 93% (yellow)              |

## 2 Entry composition i

There are 5 unique types of molecules in this entry. The entry contains 10503 atoms, of which 4402 are hydrogens and 0 are deuteriums.

In the tables below, the AltConf column contains the number of residues with at least one atom in alternate conformation and the Trace column contains the number of residues modelled with at most 2 atoms.

- Molecule 1 is a protein called Interferon-induced helicase C domain-containing protein 1.

| Mol | Chain | Residues | Atoms |      |      |     |      | AltConf | Trace |   |
|-----|-------|----------|-------|------|------|-----|------|---------|-------|---|
|     |       |          | Total | C    | H    | N   | O    |         |       | S |
| 1   | A     | 682      | 9874  | 3468 | 4402 | 950 | 1019 | 35      | 0     | 0 |

There are 18 discrepancies between the modelled and reference sequences:

| Chain | Residue | Modelled | Actual | Comment  | Reference  |
|-------|---------|----------|--------|----------|------------|
| A     | ?       | -        | ASP    | deletion | UNP Q8R5F7 |
| A     | ?       | -        | LYS    | deletion | UNP Q8R5F7 |
| A     | ?       | -        | SER    | deletion | UNP Q8R5F7 |
| A     | ?       | -        | ASP    | deletion | UNP Q8R5F7 |
| A     | ?       | -        | ASP    | deletion | UNP Q8R5F7 |
| A     | ?       | -        | GLU    | deletion | UNP Q8R5F7 |
| A     | ?       | -        | ALA    | deletion | UNP Q8R5F7 |
| A     | ?       | -        | SER    | deletion | UNP Q8R5F7 |
| A     | ?       | -        | SER    | deletion | UNP Q8R5F7 |
| A     | ?       | -        | CYS    | deletion | UNP Q8R5F7 |
| A     | ?       | -        | ASN    | deletion | UNP Q8R5F7 |
| A     | ?       | -        | ASP    | deletion | UNP Q8R5F7 |
| A     | ?       | -        | GLN    | deletion | UNP Q8R5F7 |
| A     | ?       | -        | LEU    | deletion | UNP Q8R5F7 |
| A     | ?       | -        | LYS    | deletion | UNP Q8R5F7 |
| A     | ?       | -        | GLY    | deletion | UNP Q8R5F7 |
| A     | ?       | -        | ASP    | deletion | UNP Q8R5F7 |
| A     | ?       | -        | VAL    | deletion | UNP Q8R5F7 |

- Molecule 2 is a RNA chain called RNA (5'-R(P\*CP\*AP\*AP\*GP\*CP\*CP\*GP\*AP\*GP\*GP\*AP\*GP\*AP\*G)-3').

| Mol | Chain | Residues | Atoms |     |    |    |    | AltConf | Trace |
|-----|-------|----------|-------|-----|----|----|----|---------|-------|
|     |       |          | Total | C   | N  | O  | P  |         |       |
| 2   | X     | 14       | 308   | 137 | 64 | 93 | 14 | 0       | 0     |

- Molecule 3 is a RNA chain called RNA (5'-R(P\*CP\*UP\*CP\*UP\*CP\*CP\*UP\*CP\*GP\*GP

\*CP\*UP\*UP\*G)-3').

| Mol | Chain | Residues | Atoms |     |    |     |    | AltConf | Trace |
|-----|-------|----------|-------|-----|----|-----|----|---------|-------|
|     |       |          | Total | C   | N  | O   | P  |         |       |
| 3   | Y     | 14       | 289   | 129 | 43 | 103 | 14 | 0       | 0     |

- Molecule 4 is ZINC ION (three-letter code: ZN) (formula: Zn).

| Mol | Chain | Residues | Atoms |    | AltConf |
|-----|-------|----------|-------|----|---------|
|     |       |          | Total | Zn |         |
| 4   | A     | 1        | 1     | 1  | 0       |

- Molecule 5 is PHOSPHOAMINOPHOSPHONIC ACID-ADENYLATE ESTER (three-letter code: ANP) (formula: C<sub>10</sub>H<sub>17</sub>N<sub>6</sub>O<sub>12</sub>P<sub>3</sub>).



| Mol | Chain | Residues | Atoms |    |   |    |   | AltConf |
|-----|-------|----------|-------|----|---|----|---|---------|
|     |       |          | Total | C  | N | O  | P |         |
| 5   | A     | 1        | 31    | 10 | 6 | 12 | 3 | 0       |

### 3 Residue-property plots i

These plots are drawn for all protein, RNA and DNA chains in the entry. The first graphic for a chain summarises the proportions of the various outlier classes displayed in the second graphic. The second graphic shows the sequence view annotated by issues in geometry. Residues are color-coded according to the number of geometric quality criteria for which they contain at least one outlier: green = 0, yellow = 1, orange = 2 and red = 3 or more. Stretches of 2 or more consecutive residues without any outlier are shown as a green connector. Residues present in the sample, but not in the model, are shown in grey.

- Molecule 1: Interferon-induced helicase C domain-containing protein 1

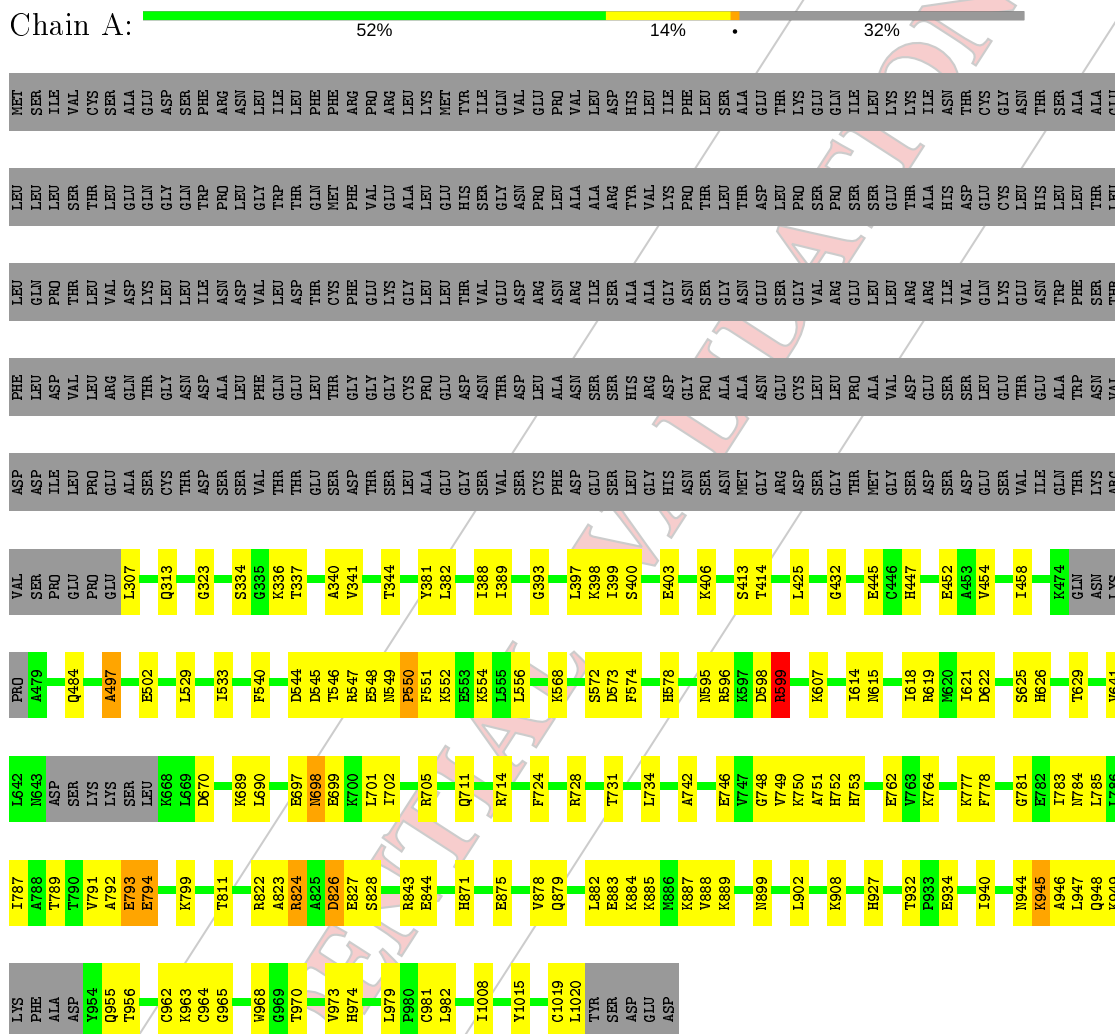

- Molecule 2: RNA (5'-R(P\*CP\*AP\*AP\*GP\*CP\*CP\*GP\*AP\*GP\*GP\*AP\*GP\*AP\*G)-3')

Chain X: 

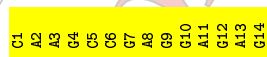



- Molecule 3: RNA (5'-R(P\*CP\*UP\*CP\*UP\*CP\*CP\*UP\*CP\*GP\*GP\*CP\*UP\*UP\*G)-3')

Chain Y:  7% 93%

|    |    |    |    |    |    |    |    |    |     |     |     |     |     |
|----|----|----|----|----|----|----|----|----|-----|-----|-----|-----|-----|
| C1 | U2 | C3 | U4 | C5 | C6 | U7 | C8 | G9 | G10 | C11 | U12 | U13 | G14 |
|----|----|----|----|----|----|----|----|----|-----|-----|-----|-----|-----|

CONFIDENTIAL VALIDATION REPORT

## 4 Experimental information i

| Property                           | Value                                                 | Source    |
|------------------------------------|-------------------------------------------------------|-----------|
| Reconstruction method              | HELICAL                                               | Depositor |
| Imposed symmetry                   | HELICAL, twist=76.7759°, rise=43.1057 Å, axial sym=C1 | Depositor |
| Number of segments used            | 28663                                                 | Depositor |
| Resolution determination method    | FSC 0.143 CUT-OFF                                     | Depositor |
| CTF correction method              | PHASE FLIPPING AND AMPLITUDE CORRECTION               | Depositor |
| Microscope                         | FEI TITAN KRIOS                                       | Depositor |
| Voltage (kV)                       | 300                                                   | Depositor |
| Electron dose ( $e^-/\text{Å}^2$ ) | 29.33                                                 | Depositor |
| Minimum defocus (nm)               | -1800                                                 | Depositor |
| Maximum defocus (nm)               | -2700                                                 | Depositor |
| Magnification                      | 75000                                                 | Depositor |
| Image detector                     | FEI FALCON III (4k x 4k)                              | Depositor |

CONFIDENTIAL

VALIDATION REPORT

## 5 Model quality i

### 5.1 Standard geometry i

Bond lengths and bond angles in the following residue types are not validated in this section: ZN, ANP

The Z score for a bond length (or angle) is the number of standard deviations the observed value is removed from the expected value. A bond length (or angle) with  $|Z| > 5$  is considered an outlier worth inspection. RMSZ is the root-mean-square of all Z scores of the bond lengths (or angles).

| Mol | Chain | Bond lengths |         | Bond angles |               |
|-----|-------|--------------|---------|-------------|---------------|
|     |       | RMSZ         | # Z  >2 | RMSZ        | # Z  >2       |
| 1   | A     | 0.55         | 0/5558  | 0.65        | 7/7469 (0.1%) |
| 2   | X     | 1.00         | 0/346   | 1.13        | 0/539         |
| 3   | Y     | 1.02         | 0/319   | 1.21        | 0/493         |
| All | All   | 0.62         | 0/6223  | 0.73        | 7/8501 (0.1%) |

Chiral center outliers are detected by calculating the chiral volume of a chiral center and verifying if the center is modelled as a planar moiety or with the opposite hand. A planarity outlier is detected by checking planarity of atoms in a peptide group, atoms in a mainchain group or atoms of a sidechain that are expected to be planar.

| Mol | Chain | #Chirality outliers | #Planarity outliers |
|-----|-------|---------------------|---------------------|
| 1   | A     | 0                   | 3                   |

There are no bond length outliers.

All (7) bond angle outliers are listed below:

| Mol | Chain | Res | Type | Atoms     | Z     | Observed(°) | Ideal(°) |
|-----|-------|-----|------|-----------|-------|-------------|----------|
| 1   | A     | 599 | ARG  | NE-CZ-NH1 | 8.81  | 124.70      | 120.30   |
| 1   | A     | 497 | ALA  | C-N-CA    | 8.37  | 142.62      | 121.70   |
| 1   | A     | 824 | ARG  | NE-CZ-NH2 | -8.18 | 116.21      | 120.30   |
| 1   | A     | 794 | GLU  | C-N-CA    | 7.86  | 138.81      | 122.30   |
| 1   | A     | 599 | ARG  | NE-CZ-NH2 | -7.59 | 116.51      | 120.30   |
| 1   | A     | 793 | GLU  | C-N-CA    | 6.80  | 138.69      | 121.70   |
| 1   | A     | 887 | LYS  | C-N-CA    | 5.90  | 136.46      | 121.70   |

There are no chirality outliers.

All (3) planarity outliers are listed below:

| Mol | Chain | Res | Type | Group   |
|-----|-------|-----|------|---------|
| 1   | A     | 454 | VAL  | Peptide |
| 1   | A     | 548 | GLU  | Peptide |
| 1   | A     | 550 | PRO  | Peptide |

## 5.2 Too-close contacts [i](#)

In the following table, the Non-H and H(model) columns list the number of non-hydrogen atoms and hydrogen atoms in the chain respectively. The H(added) column lists the number of hydrogen atoms added and optimized by MolProbity. The Clashes column lists the number of clashes within the asymmetric unit, whereas Symm-Clashes lists symmetry related clashes.

| Mol | Chain | Non-H | H(model) | H(added) | Clashes | Symm-Clashes |
|-----|-------|-------|----------|----------|---------|--------------|
| 1   | A     | 5472  | 4402     | 5597     | 126     | 0            |
| 2   | X     | 308   | 0        | 155      | 29      | 0            |
| 3   | Y     | 289   | 0        | 150      | 26      | 0            |
| 4   | A     | 1     | 0        | 0        | 0       | 0            |
| 5   | A     | 31    | 0        | 13       | 2       | 0            |
| All | All   | 6101  | 4402     | 5915     | 166     | 0            |

The all-atom clashscore is defined as the number of clashes found per 1000 atoms (including hydrogen atoms). The all-atom clashscore for this structure is 14.

All (166) close contacts within the same asymmetric unit are listed below, sorted by their clash magnitude.

| Atom-1          | Atom-2           | Interatomic distance (Å) | Clash overlap (Å) |
|-----------------|------------------|--------------------------|-------------------|
| 1:A:823:ALA:HB1 | 1:A:828:SER:HB2  | 1.65                     | 0.79              |
| 1:A:341:VAL:O   | 1:A:344:THR:OG1  | 2.01                     | 0.78              |
| 1:A:748:GLY:O   | 1:A:784:ASN:ND2  | 2.16                     | 0.77              |
| 1:A:932:THR:OG1 | 1:A:934:GLU:OE1  | 2.02                     | 0.77              |
| 1:A:751:ALA:HB2 | 1:A:785:LEU:HD21 | 1.67                     | 0.75              |
| 1:A:843:ARG:CZ  | 2:X:12:G:H5'     | 2.17                     | 0.75              |
| 1:A:962:CYS:SG  | 1:A:963:LYS:N    | 2.60                     | 0.75              |
| 1:A:336:LYS:NZ  | 5:A:1102:ANP:O3G | 2.21                     | 0.73              |
| 1:A:547:ARG:NH2 | 1:A:699:GLU:OE2  | 2.22                     | 0.72              |
| 1:A:724:PHE:HE1 | 1:A:792:ALA:HB3  | 1.54                     | 0.72              |
| 2:X:1:C:H2'     | 2:X:2:A:H8       | 1.56                     | 0.70              |
| 1:A:549:ASN:HB2 | 1:A:550:PRO:HD3  | 1.78                     | 0.66              |
| 3:Y:2:U:H2'     | 3:Y:3:C:C6       | 2.30                     | 0.65              |
| 1:A:607:LYS:NZ  | 1:A:762:GLU:OE2  | 2.31                     | 0.64              |
| 1:A:791:VAL:CG2 | 3:Y:7:U:H5''     | 2.27                     | 0.64              |
| 1:A:701:LEU:O   | 1:A:705:ARG:HG3  | 1.97                     | 0.64              |

*Continued on next page...*

Continued from previous page...

| Atom-1           | Atom-2           | Interatomic distance (Å) | Clash overlap (Å) |
|------------------|------------------|--------------------------|-------------------|
| 2:X:11:A:H2'     | 2:X:12:G:C8      | 2.33                     | 0.63              |
| 1:A:641:VAL:HG11 | 1:A:963:LYS:O    | 1.99                     | 0.63              |
| 2:X:11:A:H2'     | 2:X:12:G:H8      | 1.62                     | 0.63              |
| 3:Y:9:G:H2'      | 3:Y:10:G:C8      | 2.33                     | 0.63              |
| 1:A:742:ALA:O    | 1:A:746:GLU:HG3  | 1.99                     | 0.62              |
| 3:Y:2:U:H2'      | 3:Y:3:C:H6       | 1.64                     | 0.62              |
| 5:A:1102:ANP:N3B | 5:A:1102:ANP:O1A | 2.30                     | 0.62              |
| 1:A:1019:CYS:SG  | 1:A:1020:LEU:N   | 2.73                     | 0.61              |
| 1:A:578:HIS:ND1  | 2:X:14:G:H4'     | 2.16                     | 0.61              |
| 1:A:724:PHE:CE1  | 1:A:792:ALA:HB3  | 2.34                     | 0.60              |
| 1:A:843:ARG:NH2  | 2:X:11:A:O3'     | 2.34                     | 0.60              |
| 3:Y:1:C:H2'      | 3:Y:2:U:H6       | 1.66                     | 0.60              |
| 1:A:824:ARG:N    | 1:A:824:ARG:HD2  | 2.16                     | 0.60              |
| 2:X:8:A:H2'      | 2:X:9:G:H8       | 1.66                     | 0.60              |
| 1:A:728:ARG:O    | 1:A:731:THR:OG1  | 2.15                     | 0.60              |
| 2:X:8:A:H2'      | 2:X:9:G:C8       | 2.37                     | 0.60              |
| 1:A:313:GLN:NE2  | 1:A:334:SER:O    | 2.34                     | 0.60              |
| 1:A:389:ILE:HD11 | 1:A:397:LEU:HD13 | 1.84                     | 0.60              |
| 3:Y:13:U:H2'     | 3:Y:14:G:O4'     | 2.01                     | 0.59              |
| 1:A:445:GLU:OE1  | 1:A:447:HIS:NE2  | 2.35                     | 0.59              |
| 1:A:944:ASN:ND2  | 1:A:947:LEU:HG   | 2.17                     | 0.59              |
| 1:A:974:HIS:HB3  | 1:A:979:LEU:HD21 | 1.83                     | 0.59              |
| 1:A:899:ASN:HB2  | 1:A:1008:ILE:CG2 | 2.33                     | 0.58              |
| 3:Y:1:C:H2'      | 3:Y:2:U:C6       | 2.37                     | 0.58              |
| 1:A:413:SER:OG   | 1:A:414:THR:O    | 2.19                     | 0.58              |
| 1:A:899:ASN:HB3  | 1:A:902:LEU:HD13 | 1.85                     | 0.58              |
| 1:A:981:CYS:SG   | 1:A:982:LEU:N    | 2.76                     | 0.58              |
| 3:Y:3:C:H2'      | 3:Y:4:U:H6       | 1.69                     | 0.58              |
| 3:Y:7:U:O2'      | 3:Y:8:C:H5'      | 2.04                     | 0.58              |
| 2:X:1:C:H2'      | 2:X:2:A:C8       | 2.39                     | 0.57              |
| 1:A:944:ASN:H    | 1:A:955:GLN:HG2  | 1.68                     | 0.57              |
| 1:A:979:LEU:H    | 1:A:979:LEU:HD23 | 1.68                     | 0.57              |
| 2:X:6:C:H2'      | 2:X:7:G:H8       | 1.69                     | 0.57              |
| 1:A:964:CYS:SG   | 1:A:965:GLY:N    | 2.78                     | 0.57              |
| 1:A:734:LEU:HB2  | 1:A:787:ILE:HD13 | 1.87                     | 0.57              |
| 3:Y:4:U:H2'      | 3:Y:5:C:H6       | 1.70                     | 0.56              |
| 1:A:750:LYS:O    | 1:A:785:LEU:HD23 | 2.05                     | 0.56              |
| 1:A:945:LYS:H    | 1:A:945:LYS:HD3  | 1.70                     | 0.56              |
| 1:A:307:LEU:HB3  | 1:A:381:TYR:CD2  | 2.41                     | 0.56              |
| 1:A:641:VAL:HA   | 1:A:940:ILE:CD1  | 2.36                     | 0.56              |
| 1:A:791:VAL:HG23 | 3:Y:7:U:H5''     | 1.88                     | 0.55              |

Continued on next page...

Continued from previous page...

| Atom-1           | Atom-2            | Interatomic distance (Å) | Clash overlap (Å) |
|------------------|-------------------|--------------------------|-------------------|
| 1:A:927:HIS:CE1  | 2:X:4:G:H1'       | 2.42                     | 0.55              |
| 1:A:945:LYS:O    | 1:A:948:GLN:HG3   | 2.06                     | 0.55              |
| 1:A:970:THR:HG21 | 2:X:3:A:H4'       | 1.89                     | 0.55              |
| 2:X:6:C:H2'      | 2:X:7:G:C8        | 2.42                     | 0.55              |
| 1:A:573:ASP:OD1  | 1:A:574:PHE:N     | 2.40                     | 0.55              |
| 1:A:927:HIS:HE1  | 2:X:4:G:H1'       | 1.71                     | 0.55              |
| 3:Y:3:C:H2'      | 3:Y:4:U:C6        | 2.42                     | 0.55              |
| 1:A:752:HIS:HB2  | 1:A:783:ILE:HG12  | 1.89                     | 0.54              |
| 1:A:614:ILE:O    | 1:A:618:ILE:N     | 2.39                     | 0.53              |
| 3:Y:4:U:H2'      | 3:Y:5:C:C6        | 2.44                     | 0.53              |
| 1:A:944:ASN:HD22 | 1:A:947:LEU:HG    | 1.74                     | 0.53              |
| 1:A:711:GLN:OE1  | 1:A:714:ARG:NH2   | 2.42                     | 0.52              |
| 1:A:752:HIS:ND1  | 1:A:753:HIS:O     | 2.42                     | 0.52              |
| 1:A:425:LEU:HB2  | 1:A:432:GLY:HA3   | 1.92                     | 0.51              |
| 1:A:547:ARG:HB3  | 1:A:549:ASN:OD1   | 2.09                     | 0.51              |
| 2:X:7:G:O2'      | 2:X:8:A:H5'       | 2.10                     | 0.51              |
| 1:A:885:LYS:O    | 1:A:889:LYS:HG2   | 2.10                     | 0.51              |
| 1:A:843:ARG:NH1  | 2:X:12:G:H5'      | 2.26                     | 0.51              |
| 1:A:885:LYS:O    | 1:A:888:VAL:HB    | 2.11                     | 0.51              |
| 3:Y:5:C:O2'      | 3:Y:6:C:H5'       | 2.10                     | 0.50              |
| 1:A:702:ILE:HA   | 1:A:705:ARG:HD3   | 1.93                     | 0.50              |
| 1:A:323:GLY:O    | 1:A:484:GLN:NE2   | 2.45                     | 0.50              |
| 2:X:9:G:O2'      | 2:X:10:G:H5'      | 2.12                     | 0.50              |
| 2:X:9:G:H2'      | 2:X:10:G:H8       | 1.76                     | 0.50              |
| 3:Y:10:G:O2'     | 3:Y:11:C:H5'      | 2.12                     | 0.49              |
| 1:A:947:LEU:CD1  | 1:A:956:THR:H     | 2.25                     | 0.49              |
| 1:A:749:VAL:HG13 | 1:A:785:LEU:HD22  | 1.94                     | 0.49              |
| 2:X:5:C:H2'      | 2:X:6:C:C6        | 2.48                     | 0.49              |
| 1:A:698:ASN:OD1  | 1:A:699:GLU:N     | 2.46                     | 0.48              |
| 1:A:899:ASN:HB2  | 1:A:1008:ILE:HG21 | 1.95                     | 0.48              |
| 1:A:899:ASN:HB2  | 1:A:1008:ILE:HG22 | 1.95                     | 0.48              |
| 1:A:393:GLY:HA2  | 1:A:398:LYS:HD3   | 1.96                     | 0.48              |
| 1:A:399:ILE:HG13 | 1:A:400:SER:N     | 2.29                     | 0.48              |
| 1:A:879:GLN:O    | 1:A:883:GLU:HG3   | 2.13                     | 0.48              |
| 1:A:596:ARG:NH1  | 1:A:670:ASP:OD2   | 2.45                     | 0.48              |
| 1:A:626:HIS:O    | 1:A:629:THR:OG1   | 2.28                     | 0.48              |
| 2:X:2:A:O2'      | 2:X:3:A:H5'       | 2.14                     | 0.47              |
| 1:A:750:LYS:O    | 1:A:784:ASN:N     | 2.42                     | 0.47              |
| 1:A:791:VAL:HG22 | 3:Y:7:U:H5''      | 1.95                     | 0.47              |
| 1:A:697:GLU:O    | 1:A:698:ASN:HB2   | 2.15                     | 0.47              |
| 1:A:750:LYS:H    | 1:A:784:ASN:HD22  | 1.62                     | 0.47              |

Continued on next page...

Continued from previous page...

| Atom-1           | Atom-2           | Interatomic distance (Å) | Clash overlap (Å) |
|------------------|------------------|--------------------------|-------------------|
| 2:X:5:C:O2'      | 2:X:6:C:H5'      | 2.15                     | 0.47              |
| 1:A:337:THR:O    | 1:A:340:ALA:HB3  | 2.14                     | 0.47              |
| 2:X:8:A:O2'      | 2:X:9:G:H5'      | 2.15                     | 0.47              |
| 1:A:714:ARG:NH2  | 1:A:827:GLU:O    | 2.47                     | 0.46              |
| 1:A:731:THR:HG22 | 1:A:787:ILE:HG22 | 1.97                     | 0.46              |
| 3:Y:3:C:O2'      | 3:Y:4:U:H5'      | 2.15                     | 0.46              |
| 1:A:552:LYS:HG2  | 1:A:556:LEU:CD1  | 2.46                     | 0.46              |
| 1:A:702:ILE:O    | 1:A:705:ARG:HB2  | 2.16                     | 0.46              |
| 1:A:826:ASP:OD1  | 1:A:827:GLU:N    | 2.49                     | 0.46              |
| 1:A:962:CYS:HB2  | 1:A:968:TRP:CE2  | 2.51                     | 0.45              |
| 2:X:13:A:H2'     | 2:X:14:G:C8      | 2.51                     | 0.45              |
| 1:A:811:THR:O    | 2:X:11:A:H4'     | 2.15                     | 0.45              |
| 3:Y:8:C:H2'      | 3:Y:9:G:C8       | 2.51                     | 0.45              |
| 1:A:546:THR:C    | 1:A:547:ARG:HD3  | 2.37                     | 0.45              |
| 2:X:13:A:H2'     | 2:X:14:G:H8      | 1.82                     | 0.45              |
| 1:A:403:GLU:OE1  | 1:A:406:LYS:HD2  | 2.17                     | 0.45              |
| 1:A:540:PHE:CZ   | 1:A:844:GLU:HG2  | 2.52                     | 0.45              |
| 2:X:3:A:H2'      | 2:X:4:G:O4'      | 2.17                     | 0.44              |
| 1:A:878:VAL:O    | 1:A:882:LEU:HD13 | 2.17                     | 0.44              |
| 1:A:393:GLY:HA2  | 1:A:398:LYS:CE   | 2.47                     | 0.44              |
| 3:Y:9:G:H2'      | 3:Y:10:G:H8      | 1.78                     | 0.44              |
| 1:A:884:LYS:O    | 1:A:888:VAL:HG23 | 2.17                     | 0.44              |
| 1:A:778:PHE:CE2  | 1:A:799:LYS:HB3  | 2.53                     | 0.44              |
| 1:A:793:GLU:O    | 1:A:794:GLU:HG3  | 2.17                     | 0.44              |
| 3:Y:6:C:O2'      | 3:Y:7:U:H5'      | 2.18                     | 0.43              |
| 1:A:1015:TYR:O   | 1:A:1019:CYS:HB3 | 2.17                     | 0.43              |
| 1:A:947:LEU:HD13 | 1:A:955:GLN:HA   | 2.00                     | 0.43              |
| 1:A:822:ARG:O    | 1:A:824:ARG:HD2  | 2.18                     | 0.43              |
| 3:Y:10:G:C2'     | 3:Y:11:C:H5'     | 2.48                     | 0.43              |
| 1:A:785:LEU:HD23 | 1:A:785:LEU:H    | 1.84                     | 0.43              |
| 1:A:944:ASN:HD21 | 1:A:946:ALA:HB3  | 1.83                     | 0.43              |
| 1:A:550:PRO:HB2  | 1:A:690:LEU:HD23 | 2.00                     | 0.43              |
| 1:A:689:LYS:HA   | 1:A:689:LYS:HE2  | 1.99                     | 0.43              |
| 3:Y:8:C:O2'      | 3:Y:9:G:H5'      | 2.19                     | 0.43              |
| 1:A:551:PHE:O    | 1:A:554:LYS:HB3  | 2.18                     | 0.43              |
| 3:Y:4:U:O2'      | 3:Y:5:C:H5'      | 2.18                     | 0.43              |
| 1:A:568:LYS:HE2  | 1:A:598:ASP:OD1  | 2.18                     | 0.43              |
| 1:A:545:ASP:OD1  | 1:A:545:ASP:N    | 2.52                     | 0.42              |
| 1:A:871:HIS:NE2  | 1:A:875:GLU:OE2  | 2.52                     | 0.42              |
| 1:A:974:HIS:CB   | 1:A:979:LEU:HD21 | 2.47                     | 0.42              |
| 1:A:619:ARG:HE   | 1:A:621:ILE:CG2  | 2.33                     | 0.42              |

Continued on next page...

Continued from previous page...

| Atom-1           | Atom-2           | Interatomic distance (Å) | Clash overlap (Å) |
|------------------|------------------|--------------------------|-------------------|
| 1:A:458:ILE:H    | 1:A:458:ILE:HD12 | 1.83                     | 0.42              |
| 1:A:826:ASP:O    | 1:A:827:GLU:HB2  | 2.19                     | 0.42              |
| 1:A:393:GLY:HA2  | 1:A:398:LYS:HE2  | 2.01                     | 0.42              |
| 1:A:552:LYS:HG2  | 1:A:556:LEU:HD13 | 2.02                     | 0.42              |
| 1:A:973:VAL:HG12 | 3:Y:14:G:H4'     | 2.00                     | 0.42              |
| 1:A:497:ALA:HB1  | 1:A:502:GLU:HB2  | 2.00                     | 0.42              |
| 1:A:452:GLU:O    | 2:X:8:A:H4'      | 2.20                     | 0.42              |
| 1:A:792:ALA:O    | 1:A:822:ARG:NH2  | 2.53                     | 0.42              |
| 1:A:973:VAL:O    | 3:Y:14:G:H5'     | 2.20                     | 0.41              |
| 1:A:714:ARG:NH2  | 1:A:827:GLU:HB3  | 2.36                     | 0.41              |
| 1:A:764:LYS:HE2  | 1:A:949:LYS:HG3  | 2.02                     | 0.41              |
| 1:A:545:ASP:HB3  | 1:A:699:GLU:CD   | 2.41                     | 0.41              |
| 1:A:751:ALA:HB2  | 1:A:785:LEU:CD2  | 2.46                     | 0.41              |
| 1:A:944:ASN:OD1  | 1:A:945:LYS:N    | 2.54                     | 0.41              |
| 1:A:777:LYS:O    | 1:A:781:GLY:N    | 2.52                     | 0.41              |
| 1:A:572:SER:OG   | 1:A:573:ASP:N    | 2.54                     | 0.41              |
| 1:A:622:ASP:O    | 1:A:625:SER:OG   | 2.32                     | 0.41              |
| 1:A:927:HIS:CE1  | 2:X:4:G:HO2'     | 2.39                     | 0.41              |
| 1:A:399:ILE:HG13 | 1:A:400:SER:H    | 1.86                     | 0.41              |
| 1:A:789:THR:OG1  | 1:A:791:VAL:HG23 | 2.21                     | 0.41              |
| 1:A:529:LEU:O    | 1:A:533:ILE:N    | 2.42                     | 0.40              |
| 1:A:544:ASP:OD1  | 1:A:545:ASP:N    | 2.53                     | 0.40              |
| 1:A:973:VAL:CG1  | 3:Y:14:G:H4'     | 2.52                     | 0.40              |
| 1:A:382:LEU:HB2  | 1:A:388:ILE:HD11 | 2.03                     | 0.40              |
| 1:A:599:ARG:HH21 | 1:A:908:LYS:HG2  | 1.86                     | 0.40              |
| 1:A:731:THR:HA   | 1:A:787:ILE:HG21 | 2.03                     | 0.40              |
| 2:X:13:A:O2'     | 2:X:14:G:H5'     | 2.21                     | 0.40              |

There are no symmetry-related clashes.

## 5.3 Torsion angles [i](#)

### 5.3.1 Protein backbone [i](#)

In the following table, the Percentiles column shows the percent Ramachandran outliers of the chain as a percentile score with respect to all PDB entries followed by that with respect to all EM entries.

The Analysed column shows the number of residues for which the backbone conformation was analysed, and the total number of residues.



| Mol | Chain | Analysed       | Favoured  | Allowed  | Outliers | Percentiles |
|-----|-------|----------------|-----------|----------|----------|-------------|
| 1   | A     | 674/1007 (67%) | 599 (89%) | 73 (11%) | 2 (0%)   | 43 80       |

All (2) Ramachandran outliers are listed below:

| Mol | Chain | Res | Type |
|-----|-------|-----|------|
| 1   | A     | 698 | ASN  |
| 1   | A     | 826 | ASP  |

### 5.3.2 Protein sidechains [i](#)

In the following table, the Percentiles column shows the percent sidechain outliers of the chain as a percentile score with respect to all PDB entries followed by that with respect to all EM entries.

The Analysed column shows the number of residues for which the sidechain conformation was analysed, and the total number of residues.

| Mol | Chain | Analysed      | Rotameric | Outliers | Percentiles |
|-----|-------|---------------|-----------|----------|-------------|
| 1   | A     | 608/900 (68%) | 604 (99%) | 4 (1%)   | 85 93       |

All (4) residues with a non-rotameric sidechain are listed below:

| Mol | Chain | Res | Type |
|-----|-------|-----|------|
| 1   | A     | 595 | ASN  |
| 1   | A     | 599 | ARG  |
| 1   | A     | 615 | ASN  |
| 1   | A     | 945 | LYS  |

Some sidechains can be flipped to improve hydrogen bonding and reduce clashes. All (7) such sidechains are listed below:

| Mol | Chain | Res | Type |
|-----|-------|-----|------|
| 1   | A     | 372 | GLN  |
| 1   | A     | 420 | ASN  |
| 1   | A     | 563 | GLN  |
| 1   | A     | 595 | ASN  |
| 1   | A     | 678 | ASN  |
| 1   | A     | 784 | ASN  |
| 1   | A     | 957 | ASN  |

### 5.3.3 RNA [i](#)

| Mol | Chain | Analysed    | Backbone Outliers | Pucker Outliers |
|-----|-------|-------------|-------------------|-----------------|
| 2   | X     | 13/14 (92%) | 0                 | 0               |
| 3   | Y     | 13/14 (92%) | 0                 | 0               |
| All | All   | 26/28 (92%) | 0                 | 0               |

There are no RNA backbone outliers to report.

There are no RNA pucker outliers to report.

#### 5.4 Non-standard residues in protein, DNA, RNA chains [i](#)

There are no non-standard protein/DNA/RNA residues in this entry.

#### 5.5 Carbohydrates [i](#)

There are no carbohydrates in this entry.

#### 5.6 Ligand geometry [i](#)

Of 2 ligands modelled in this entry, 1 is monoatomic - leaving 1 for Mogul analysis.

In the following table, the Counts columns list the number of bonds (or angles) for which Mogul statistics could be retrieved, the number of bonds (or angles) that are observed in the model and the number of bonds (or angles) that are defined in the Chemical Component Dictionary. The Link column lists molecule types, if any, to which the group is linked. The Z score for a bond length (or angle) is the number of standard deviations the observed value is removed from the expected value. A bond length (or angle) with  $|Z| > 2$  is considered an outlier worth inspection. RMSZ is the root-mean-square of all Z scores of the bond lengths (or angles).

| Mol | Type | Chain | Res  | Link | Bond lengths |      |             | Bond angles |      |             |
|-----|------|-------|------|------|--------------|------|-------------|-------------|------|-------------|
|     |      |       |      |      | Counts       | RMSZ | $\# Z  > 2$ | Counts      | RMSZ | $\# Z  > 2$ |
| 5   | ANP  | A     | 1102 | -    | 29,33,33     | 2.76 | 6 (20%)     | 29,52,52    | 1.33 | 3 (10%)     |

In the following table, the Chirals column lists the number of chiral outliers, the number of chiral centers analysed, the number of these observed in the model and the number defined in the Chemical Component Dictionary. Similar counts are reported in the Torsion and Rings columns. '-' means no outliers of that kind were identified.

| Mol | Type | Chain | Res  | Link | Chirals | Torsions   | Rings   |
|-----|------|-------|------|------|---------|------------|---------|
| 5   | ANP  | A     | 1102 | -    | -       | 0/13/38/38 | 0/3/3/3 |

All (6) bond length outliers are listed below:

| Mol | Chain | Res  | Type | Atoms  | Z     | Observed(Å) | Ideal(Å) |
|-----|-------|------|------|--------|-------|-------------|----------|
| 5   | A     | 1102 | ANP  | PB-O3A | -2.72 | 1.55        | 1.59     |
| 5   | A     | 1102 | ANP  | PB-O2B | -2.49 | 1.49        | 1.56     |
| 5   | A     | 1102 | ANP  | PG-O2G | -2.39 | 1.50        | 1.56     |
| 5   | A     | 1102 | ANP  | PG-N3B | 2.13  | 1.69        | 1.63     |
| 5   | A     | 1102 | ANP  | PB-O1B | 8.65  | 1.55        | 1.46     |
| 5   | A     | 1102 | ANP  | PG-O1G | 10.51 | 1.58        | 1.46     |

All (3) bond angle outliers are listed below:

| Mol | Chain | Res  | Type | Atoms      | Z     | Observed(°) | Ideal(°) |
|-----|-------|------|------|------------|-------|-------------|----------|
| 5   | A     | 1102 | ANP  | PA-O3A-PB  | -4.57 | 116.36      | 132.40   |
| 5   | A     | 1102 | ANP  | O1B-PB-N3B | -2.93 | 107.40      | 111.79   |
| 5   | A     | 1102 | ANP  | O1G-PG-N3B | -2.31 | 108.33      | 111.79   |

There are no chirality outliers.

There are no torsion outliers.

There are no ring outliers.

1 monomer is involved in 2 short contacts:

| Mol | Chain | Res  | Type | Clashes | Symm-Clashes |
|-----|-------|------|------|---------|--------------|
| 5   | A     | 1102 | ANP  | 2       | 0            |

## 5.7 Other polymers [i](#)

There are no such residues in this entry.

## 5.8 Polymer linkage issues [i](#)

There are no chain breaks in this entry.



# Full wwPDB/EMDataBank EM Map/Model Validation Report ⓘ

May 21, 2018 – 03:39 PM BST

PDB ID : 6GKH  
EMDB ID: : 4338  
Title : CryoEM structure of the MDA5-dsRNA filament in complex with ADP-AIF4  
Deposited on : 2018-05-21  
Resolution : 4.06 Å(reported)

This is a Full wwPDB/EMDataBank EM Map/Model Validation Report.

This report is produced by the wwPDB biocuration pipeline after annotation of the structure.

We welcome your comments at [validation@mail.wwpdb.org](mailto:validation@mail.wwpdb.org)

A user guide is available at

<https://www.wwpdb.org/validation/2017/EMValidationReportHelp>

with specific help available everywhere you see the ⓘ symbol.

---

MolProbity : 4.02b-467  
Mogul : 1.7.3 (157068), CSD as539be (2018)  
Percentile statistics : 20171227.v01 (using entries in the PDB archive December 27th 2017)  
Ideal geometry (proteins) : Engh & Huber (2001)  
Ideal geometry (DNA, RNA) : Parkinson et. al. (1996)  
Validation Pipeline (wwPDB-VP) : rb-20031021

# 1 Overall quality at a glance i

The following experimental techniques were used to determine the structure:  
*ELECTRON MICROSCOPY*

The reported resolution of this entry is 4.06 Å.

Percentile scores (ranging between 0-100) for global validation metrics of the entry are shown in the following graphic. The table shows the number of entries on which the scores are based.

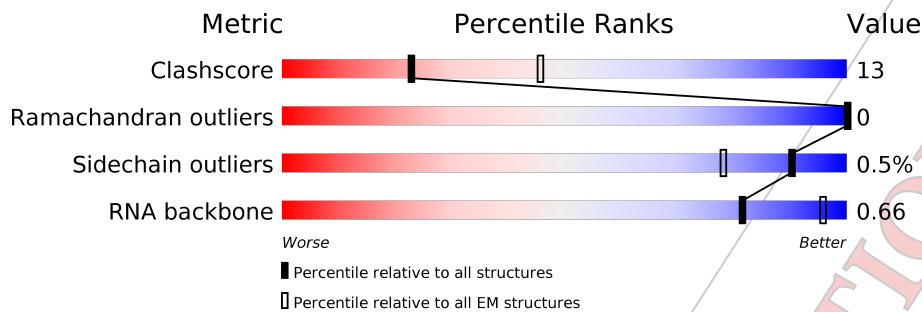

| Metric                | Whole archive (#Entries) | EM structures (#Entries) |
|-----------------------|--------------------------|--------------------------|
| Clashscore            | 136327                   | 1886                     |
| Ramachandran outliers | 132723                   | 1663                     |
| Sidechain outliers    | 132532                   | 1531                     |
| RNA backbone          | 3747                     | 458                      |

The table below summarises the geometric issues observed across the polymeric chains. The red, orange, yellow and green segments on the bar indicate the fraction of residues that contain outliers for  $\geq 3$ , 2, 1 and 0 types of geometric quality criteria. A grey segment represents the fraction of residues that are not modelled. The numeric value for each fraction is indicated below the corresponding segment, with a dot representing fractions  $\leq 5\%$

| Mol | Chain | Length | Quality of chain                      |
|-----|-------|--------|---------------------------------------|
| 1   | A     | 1007   | 51% (green), 16% (yellow), 32% (grey) |
| 2   | X     | 15     | 13% (green), 87% (yellow)             |
| 3   | Y     | 15     | 7% (green), 87% (yellow), 7% (orange) |

## 2 Entry composition i

There are 7 unique types of molecules in this entry. The entry contains 10599 atoms, of which 4411 are hydrogens and 0 are deuteriums.

In the tables below, the AltConf column contains the number of residues with at least one atom in alternate conformation and the Trace column contains the number of residues modelled with at most 2 atoms.

- Molecule 1 is a protein called Interferon-induced helicase C domain-containing protein 1.

| Mol | Chain | Residues | Atoms |      |      |     |      | AltConf | Trace |   |
|-----|-------|----------|-------|------|------|-----|------|---------|-------|---|
|     |       |          | Total | C    | H    | N   | O    |         |       | S |
| 1   | A     | 685      | 9914  | 3494 | 4399 | 956 | 1030 | 35      | 0     | 0 |

There are 18 discrepancies between the modelled and reference sequences:

| Chain | Residue | Modelled | Actual | Comment  | Reference  |
|-------|---------|----------|--------|----------|------------|
| A     | ?       | -        | ASP    | deletion | UNP Q8R5F7 |
| A     | ?       | -        | LYS    | deletion | UNP Q8R5F7 |
| A     | ?       | -        | SER    | deletion | UNP Q8R5F7 |
| A     | ?       | -        | ASP    | deletion | UNP Q8R5F7 |
| A     | ?       | -        | ASP    | deletion | UNP Q8R5F7 |
| A     | ?       | -        | GLU    | deletion | UNP Q8R5F7 |
| A     | ?       | -        | ALA    | deletion | UNP Q8R5F7 |
| A     | ?       | -        | SER    | deletion | UNP Q8R5F7 |
| A     | ?       | -        | SER    | deletion | UNP Q8R5F7 |
| A     | ?       | -        | CYS    | deletion | UNP Q8R5F7 |
| A     | ?       | -        | ASN    | deletion | UNP Q8R5F7 |
| A     | ?       | -        | ASP    | deletion | UNP Q8R5F7 |
| A     | ?       | -        | GLN    | deletion | UNP Q8R5F7 |
| A     | ?       | -        | LEU    | deletion | UNP Q8R5F7 |
| A     | ?       | -        | LYS    | deletion | UNP Q8R5F7 |
| A     | ?       | -        | GLY    | deletion | UNP Q8R5F7 |
| A     | ?       | -        | ASP    | deletion | UNP Q8R5F7 |
| A     | ?       | -        | VAL    | deletion | UNP Q8R5F7 |

- Molecule 2 is a RNA chain called RNA (5'-R(P\*GP\*UP\*CP\*AP\*AP\*GP\*CP\*CP\*GP\*AP\*GP\*GP\*AP\*GP\*A)-3').

| Mol | Chain | Residues | Atoms |     |    |     |    | AltConf | Trace |
|-----|-------|----------|-------|-----|----|-----|----|---------|-------|
|     |       |          | Total | C   | N  | O   | P  |         |       |
| 2   | X     | 15       | 328   | 146 | 66 | 101 | 15 | 0       | 0     |

- Molecule 3 is a RNA chain called RNA (5'-R(P\*UP\*CP\*UP\*CP\*CP\*UP\*CP\*GP\*GP\*CP

\*UP\*UP\*GP\*AP\*C)-3').

| Mol | Chain | Residues | Atoms |     |    |     |    | AltConf | Trace |
|-----|-------|----------|-------|-----|----|-----|----|---------|-------|
|     |       |          | Total | C   | N  | O   | P  |         |       |
| 3   | Y     | 15       | 311   | 139 | 48 | 109 | 15 | 0       | 0     |

- Molecule 4 is ADENOSINE-5'-DIPHOSPHATE (three-letter code: ADP) (formula: C<sub>10</sub>H<sub>15</sub>N<sub>5</sub>O<sub>10</sub>P<sub>2</sub>).

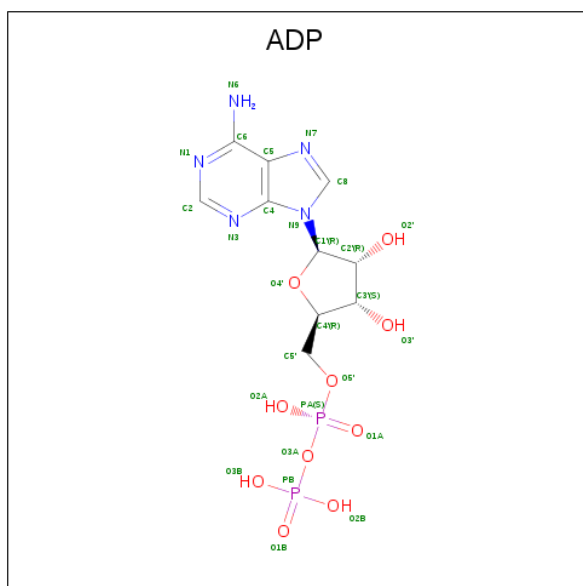

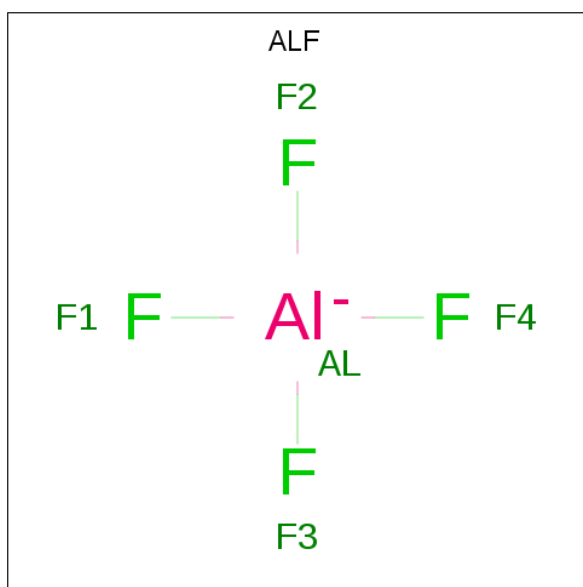

| Mol | Chain | Residues | Atoms |    |   | AltConf |
|-----|-------|----------|-------|----|---|---------|
|     |       |          | Total | Al | F |         |
| 5   | A     | 1        | 5     | 1  | 4 | 0       |

- Molecule 6 is MAGNESIUM ION (three-letter code: MG) (formula: Mg).

| Mol | Chain | Residues | Atoms |    | AltConf |
|-----|-------|----------|-------|----|---------|
|     |       |          | Total | Mg |         |
| 6   | A     | 1        | 1     | 1  | 0       |

- Molecule 7 is ZINC ION (three-letter code: ZN) (formula: Zn).

| Mol | Chain | Residues | Atoms |    | AltConf |
|-----|-------|----------|-------|----|---------|
|     |       |          | Total | Zn |         |
| 7   | A     | 1        | 1     | 1  | 0       |



### 3 Residue-property plots i

These plots are drawn for all protein, RNA and DNA chains in the entry. The first graphic for a chain summarises the proportions of the various outlier classes displayed in the second graphic. The second graphic shows the sequence view annotated by issues in geometry. Residues are color-coded according to the number of geometric quality criteria for which they contain at least one outlier: green = 0, yellow = 1, orange = 2 and red = 3 or more. Stretches of two or more consecutive residues without any outlier are shown as a green connector. Residues present in the sample, but not in the model, are shown in grey.

- Molecule 1: Interferon-induced helicase C domain-containing protein 1

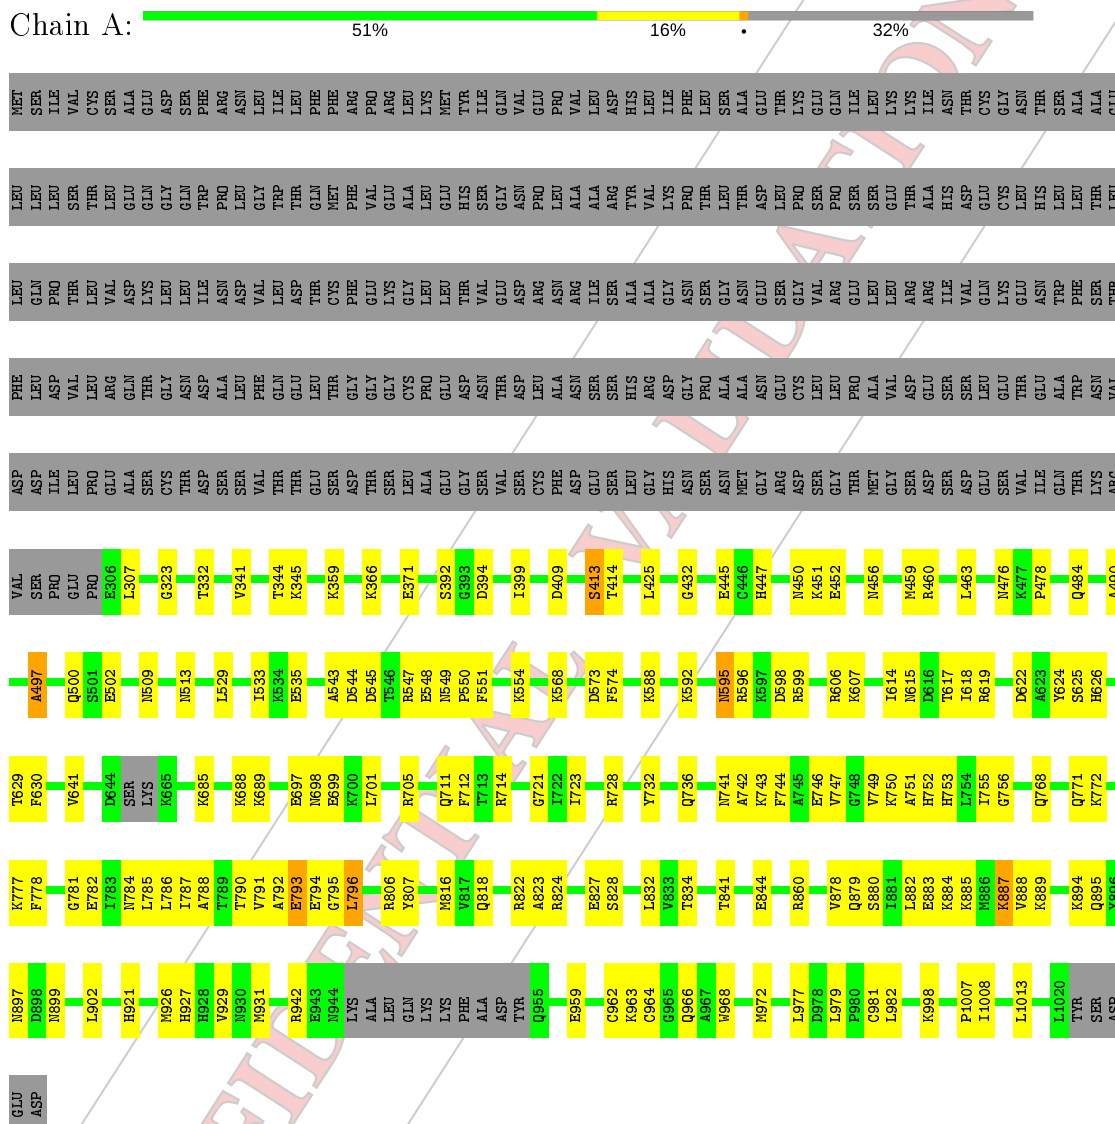

- Molecule 2: RNA (5'-R(P\*GP\*UP\*CP\*AP\*AP\*GP\*CP\*CP\*GP\*AP\*GP\*GP\*AP\*GP\*A)-3')

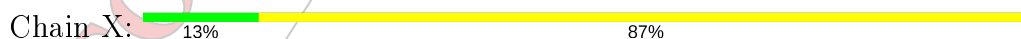

G1  
U2  
C3  
A4  
A5  
G6  
C7  
C8  
G9  
A10  
G11  
G12  
A13  
G14  
A15

- Molecule 3: RNA (5'-R(P\*UP\*CP\*UP\*CP\*CP\*UP\*CP\*GP\*GP\*CP\*UP\*UP\*GP\*AP\*C)-3')

Chain Y:  7% 87% 7%

U1  
C2  
U3  
C4  
C5  
U6  
C7  
G8  
G9  
C10  
U11  
U12  
G13  
A14  
C15

CONFIDENTIAL VALIDATION REPORT

## 4 Experimental information [i](#)

| Property                           | Value                                                 | Source    |
|------------------------------------|-------------------------------------------------------|-----------|
| Reconstruction method              | HELICAL                                               | Depositor |
| Imposed symmetry                   | HELICAL, twist=87.8315°, rise=46.5105 Å, axial sym=C1 | Depositor |
| Number of segments used            | 31556                                                 | Depositor |
| Resolution determination method    | FSC 0.143 CUT-OFF                                     | Depositor |
| CTF correction method              | PHASE FLIPPING AND AMPLITUDE CORRECTION               | Depositor |
| Microscope                         | FEI TITAN KRIOS                                       | Depositor |
| Voltage (kV)                       | 300                                                   | Depositor |
| Electron dose ( $e^-/\text{Å}^2$ ) | 29.85                                                 | Depositor |
| Minimum defocus (nm)               | -1800                                                 | Depositor |
| Maximum defocus (nm)               | -2700                                                 | Depositor |
| Magnification                      | 75000                                                 | Depositor |
| Image detector                     | FEI FALCON III (4k x 4k)                              | Depositor |

CONFIDENTIAL

VALIDATION REPORT

## 5 Model quality i

### 5.1 Standard geometry i

Bond lengths and bond angles in the following residue types are not validated in this section: ALF, ZN, MG, ADP

The Z score for a bond length (or angle) is the number of standard deviations the observed value is removed from the expected value. A bond length (or angle) with  $|Z| > 5$  is considered an outlier worth inspection. RMSZ is the root-mean-square of all Z scores of the bond lengths (or angles).

| Mol | Chain | Bond lengths |         | Bond angles |               |
|-----|-------|--------------|---------|-------------|---------------|
|     |       | RMSZ         | # Z  >2 | RMSZ        | # Z  >2       |
| 1   | A     | 0.33         | 0/5604  | 0.58        | 7/7532 (0.1%) |
| 2   | X     | 0.42         | 0/368   | 0.88        | 0/573         |
| 3   | Y     | 0.37         | 0/344   | 0.85        | 0/532         |
| All | All   | 0.33         | 0/6316  | 0.62        | 7/8637 (0.1%) |

Chiral center outliers are detected by calculating the chiral volume of a chiral center and verifying if the center is modelled as a planar moiety or with the opposite hand. A planarity outlier is detected by checking planarity of atoms in a peptide group, atoms in a mainchain group or atoms of a sidechain that are expected to be planar.

| Mol | Chain | #Chirality outliers | #Planarity outliers |
|-----|-------|---------------------|---------------------|
| 1   | A     | 0                   | 1                   |

There are no bond length outliers.

All (7) bond angle outliers are listed below:

| Mol | Chain | Res | Type | Atoms    | Z     | Observed(°) | Ideal(°) |
|-----|-------|-----|------|----------|-------|-------------|----------|
| 1   | A     | 497 | ALA  | C-N-CA   | 10.74 | 148.54      | 121.70   |
| 1   | A     | 399 | ILE  | C-N-CA   | 7.61  | 140.72      | 121.70   |
| 1   | A     | 827 | GLU  | C-N-CA   | 6.48  | 137.89      | 121.70   |
| 1   | A     | 887 | LYS  | C-N-CA   | 5.57  | 135.62      | 121.70   |
| 1   | A     | 451 | LYS  | C-N-CA   | 5.47  | 135.37      | 121.70   |
| 1   | A     | 793 | GLU  | C-N-CA   | 5.02  | 134.25      | 121.70   |
| 1   | A     | 796 | LEU  | CA-CB-CG | 5.01  | 126.82      | 115.30   |

There are no chirality outliers.

All (1) planarity outliers are listed below:

| Mol | Chain | Res | Type | Group   |
|-----|-------|-----|------|---------|
| 1   | A     | 413 | SER  | Peptide |

## 5.2 Too-close contacts [i](#)

In the following table, the Non-H and H(model) columns list the number of non-hydrogen atoms and hydrogen atoms in the chain respectively. The H(added) column lists the number of hydrogen atoms added and optimized by MolProbity. The Clashes column lists the number of clashes within the asymmetric unit, whereas Symm-Clashes lists symmetry related clashes.

| Mol | Chain | Non-H | H(model) | H(added) | Clashes | Symm-Clashes |
|-----|-------|-------|----------|----------|---------|--------------|
| 1   | A     | 5515  | 4399     | 5641     | 122     | 0            |
| 2   | X     | 328   | 0        | 165      | 24      | 0            |
| 3   | Y     | 311   | 0        | 161      | 26      | 0            |
| 4   | A     | 27    | 12       | 12       | 1       | 0            |
| 5   | A     | 5     | 0        | 0        | 0       | 0            |
| 6   | A     | 1     | 0        | 0        | 0       | 0            |
| 7   | A     | 1     | 0        | 0        | 0       | 0            |
| All | All   | 6188  | 4411     | 5979     | 164     | 0            |

The all-atom clashscore is defined as the number of clashes found per 1000 atoms (including hydrogen atoms). The all-atom clashscore for this structure is 13.

All (164) close contacts within the same asymmetric unit are listed below, sorted by their clash magnitude.

| Atom-1           | Atom-2           | Interatomic distance (Å) | Clash overlap (Å) |
|------------------|------------------|--------------------------|-------------------|
| 1:A:543:ALA:HB1  | 1:A:699:GLU:HB3  | 1.52                     | 0.92              |
| 1:A:749:VAL:HG12 | 1:A:785:LEU:HD22 | 1.59                     | 0.82              |
| 1:A:790:THR:HG1  | 3:Y:6:U:HO2'     | 1.14                     | 0.81              |
| 1:A:749:VAL:HA   | 1:A:784:ASN:HD22 | 1.47                     | 0.79              |
| 1:A:751:ALA:HB2  | 1:A:785:LEU:HD21 | 1.67                     | 0.75              |
| 1:A:359:LYS:NZ   | 1:A:409:ASP:OD1  | 2.20                     | 0.74              |
| 1:A:392:SER:OG   | 1:A:394:ASP:OD1  | 2.06                     | 0.73              |
| 1:A:705:ARG:HH21 | 1:A:743:LYS:HD2  | 1.54                     | 0.73              |
| 1:A:341:VAL:O    | 1:A:344:THR:OG1  | 2.09                     | 0.70              |
| 1:A:962:CYS:SG   | 1:A:963:LYS:N    | 2.65                     | 0.70              |
| 1:A:476:ASN:HB3  | 1:A:478:PRO:HD2  | 1.75                     | 0.69              |
| 1:A:791:VAL:HG22 | 3:Y:7:C:H5''     | 1.75                     | 0.68              |
| 2:X:8:C:H2'      | 2:X:9:G:C8       | 2.29                     | 0.67              |
| 1:A:529:LEU:O    | 1:A:533:ILE:N    | 2.27                     | 0.67              |
| 2:X:8:C:H2'      | 2:X:9:G:H8       | 1.60                     | 0.66              |
| 1:A:824:ARG:NH2  | 4:A:1101:ADP:O2B | 2.28                     | 0.66              |

*Continued on next page...*

Continued from previous page...

| Atom-1           | Atom-2           | Interatomic distance (Å) | Clash overlap (Å) |
|------------------|------------------|--------------------------|-------------------|
| 1:A:595:ASN:ND2  | 1:A:596:ARG:O    | 2.30                     | 0.64              |
| 1:A:460:ARG:NH1  | 1:A:880:SER:O    | 2.32                     | 0.62              |
| 2:X:10:A:H2'     | 2:X:11:G:H8      | 1.63                     | 0.62              |
| 2:X:10:A:H2'     | 2:X:11:G:C8      | 2.34                     | 0.62              |
| 3:Y:3:U:H2'      | 3:Y:4:C:C6       | 2.36                     | 0.61              |
| 1:A:607:LYS:HE3  | 1:A:630:PHE:CE1  | 2.35                     | 0.61              |
| 1:A:931:MET:HE3  | 1:A:977:LEU:HB3  | 1.82                     | 0.61              |
| 1:A:979:LEU:HD23 | 1:A:979:LEU:H    | 1.66                     | 0.61              |
| 1:A:624:TYR:CZ   | 1:A:688:LYS:HB2  | 2.36                     | 0.60              |
| 3:Y:2:C:H2'      | 3:Y:3:U:C6       | 2.37                     | 0.60              |
| 3:Y:2:C:H2'      | 3:Y:3:U:H6       | 1.67                     | 0.58              |
| 1:A:701:LEU:O    | 1:A:705:ARG:HG3  | 2.04                     | 0.58              |
| 2:X:5:A:H2'      | 2:X:6:G:C8       | 2.38                     | 0.58              |
| 1:A:841:THR:O    | 1:A:844:GLU:HB3  | 2.04                     | 0.58              |
| 1:A:323:GLY:O    | 1:A:484:GLN:NE2  | 2.37                     | 0.58              |
| 1:A:614:ILE:O    | 1:A:618:ILE:N    | 2.37                     | 0.58              |
| 1:A:962:CYS:HB3  | 1:A:966:GLN:H    | 1.69                     | 0.57              |
| 1:A:791:VAL:CG2  | 3:Y:7:C:H5''     | 2.34                     | 0.57              |
| 3:Y:9:G:O2'      | 3:Y:10:C:H5'     | 2.04                     | 0.57              |
| 1:A:697:GLU:HG3  | 1:A:698:ASN:H    | 1.69                     | 0.57              |
| 1:A:617:THR:O    | 1:A:807:TYR:OH   | 2.23                     | 0.56              |
| 2:X:11:G:H2'     | 2:X:12:G:H8      | 1.70                     | 0.56              |
| 1:A:592:LYS:HE2  | 1:A:998:LYS:HA   | 1.87                     | 0.56              |
| 2:X:12:G:O2'     | 2:X:13:A:H5'     | 2.05                     | 0.56              |
| 1:A:795:GLY:O    | 1:A:822:ARG:NH1  | 2.38                     | 0.56              |
| 1:A:926:MET:CE   | 2:X:7:C:H1'      | 2.35                     | 0.56              |
| 3:Y:1:U:O2'      | 3:Y:2:C:H5'      | 2.06                     | 0.56              |
| 1:A:897:ASN:HB3  | 1:A:899:ASN:ND2  | 2.21                     | 0.56              |
| 3:Y:3:U:H2'      | 3:Y:4:C:H6       | 1.70                     | 0.56              |
| 1:A:723:ILE:HD12 | 1:A:785:LEU:HD12 | 1.87                     | 0.55              |
| 1:A:885:LYS:O    | 1:A:889:LYS:HG2  | 2.07                     | 0.55              |
| 1:A:549:ASN:OD1  | 1:A:550:PRO:HD3  | 2.06                     | 0.55              |
| 1:A:705:ARG:HG2  | 1:A:744:PHE:HZ   | 1.71                     | 0.55              |
| 1:A:622:ASP:O    | 1:A:625:SER:OG   | 2.20                     | 0.54              |
| 1:A:568:LYS:HE2  | 1:A:598:ASP:OD1  | 2.06                     | 0.54              |
| 1:A:425:LEU:HB2  | 1:A:432:GLY:HA3  | 1.89                     | 0.54              |
| 2:X:4:A:O2'      | 2:X:5:A:H5'      | 2.07                     | 0.54              |
| 3:Y:7:C:H2'      | 3:Y:8:G:C8       | 2.43                     | 0.53              |
| 1:A:619:ARG:HD3  | 1:A:697:GLU:HB2  | 1.91                     | 0.53              |
| 1:A:929:VAL:HG21 | 1:A:979:LEU:HB2  | 1.91                     | 0.53              |
| 2:X:11:G:H2'     | 2:X:12:G:C8      | 2.44                     | 0.53              |

Continued on next page...

Continued from previous page...

| Atom-1           | Atom-2           | Interatomic distance (Å) | Clash overlap (Å) |
|------------------|------------------|--------------------------|-------------------|
| 1:A:777:LYS:O    | 1:A:782:GLU:N    | 2.42                     | 0.52              |
| 1:A:750:LYS:NZ   | 1:A:782:GLU:O    | 2.22                     | 0.52              |
| 1:A:705:ARG:HG2  | 1:A:744:PHE:CZ   | 2.45                     | 0.52              |
| 3:Y:4:C:H2'      | 3:Y:5:C:C6       | 2.44                     | 0.52              |
| 1:A:606:ARG:NH2  | 3:Y:4:C:OP1      | 2.43                     | 0.52              |
| 1:A:962:CYS:N    | 1:A:966:GLN:O    | 2.42                     | 0.52              |
| 1:A:509:ASN:OD1  | 1:A:513:ASN:ND2  | 2.42                     | 0.51              |
| 3:Y:12:U:H2'     | 3:Y:13:G:O4'     | 2.10                     | 0.51              |
| 3:Y:3:U:O2'      | 3:Y:4:C:H5'      | 2.10                     | 0.51              |
| 1:A:366:LYS:NZ   | 1:A:794:GLU:OE1  | 2.43                     | 0.51              |
| 1:A:497:ALA:HB1  | 1:A:502:GLU:HB2  | 1.92                     | 0.51              |
| 1:A:711:GLN:OE1  | 1:A:714:ARG:NH2  | 2.44                     | 0.51              |
| 1:A:413:SER:OG   | 1:A:414:THR:O    | 2.22                     | 0.51              |
| 1:A:926:MET:HE2  | 2:X:7:C:H1'      | 1.92                     | 0.51              |
| 1:A:544:ASP:O    | 1:A:699:GLU:HG2  | 2.12                     | 0.50              |
| 1:A:550:PRO:O    | 1:A:554:LYS:HB2  | 2.11                     | 0.50              |
| 1:A:721:GLY:N    | 1:A:784:ASN:O    | 2.44                     | 0.50              |
| 1:A:588:LYS:O    | 1:A:592:LYS:HG3  | 2.13                     | 0.49              |
| 1:A:732:TYR:O    | 1:A:736:GLN:HG2  | 2.12                     | 0.49              |
| 1:A:755:ILE:O    | 1:A:771:GLN:NE2  | 2.46                     | 0.49              |
| 3:Y:4:C:H2'      | 3:Y:5:C:H6       | 1.76                     | 0.49              |
| 1:A:899:ASN:HB2  | 1:A:1008:ILE:CG2 | 2.43                     | 0.48              |
| 1:A:899:ASN:HB3  | 1:A:902:LEU:HD13 | 1.94                     | 0.48              |
| 3:Y:5:C:O2'      | 3:Y:6:U:H5'      | 2.13                     | 0.48              |
| 1:A:366:LYS:NZ   | 1:A:794:GLU:HB2  | 2.28                     | 0.48              |
| 1:A:927:HIS:HE1  | 2:X:6:G:H1'      | 1.79                     | 0.48              |
| 1:A:535:GLU:OE1  | 1:A:535:GLU:N    | 2.47                     | 0.48              |
| 1:A:626:HIS:O    | 1:A:629:THR:OG1  | 2.22                     | 0.47              |
| 1:A:806:ARG:HH12 | 1:A:816:MET:HA   | 1.79                     | 0.47              |
| 1:A:942:ARG:NH2  | 1:A:959:GLU:OE1  | 2.43                     | 0.47              |
| 1:A:790:THR:HG22 | 1:A:793:GLU:OE2  | 2.14                     | 0.47              |
| 2:X:3:C:O2'      | 2:X:4:A:H5'      | 2.15                     | 0.47              |
| 1:A:884:LYS:O    | 1:A:888:VAL:HG23 | 2.13                     | 0.47              |
| 1:A:878:VAL:O    | 1:A:882:LEU:HD13 | 2.14                     | 0.47              |
| 1:A:962:CYS:HB3  | 1:A:966:GLN:N    | 2.29                     | 0.47              |
| 1:A:929:VAL:HG21 | 1:A:979:LEU:HD12 | 1.97                     | 0.47              |
| 3:Y:7:C:H2'      | 3:Y:8:G:H8       | 1.79                     | 0.47              |
| 1:A:972:MET:O    | 1:A:979:LEU:HD23 | 2.14                     | 0.46              |
| 2:X:7:C:O2'      | 2:X:8:C:H5'      | 2.15                     | 0.46              |
| 1:A:394:ASP:HB3  | 1:A:768:GLN:HG3  | 1.97                     | 0.46              |
| 1:A:544:ASP:OD1  | 1:A:545:ASP:N    | 2.49                     | 0.46              |

Continued on next page...

Continued from previous page...

| Atom-1          | Atom-2            | Interatomic distance (Å) | Clash overlap (Å) |
|-----------------|-------------------|--------------------------|-------------------|
| 2:X:13:A:H2'    | 2:X:14:G:C8       | 2.51                     | 0.46              |
| 1:A:712:PHE:HB3 | 1:A:747:VAL:HG11  | 1.97                     | 0.46              |
| 1:A:749:VAL:CG1 | 1:A:785:LEU:HD22  | 2.39                     | 0.45              |
| 1:A:879:GLN:O   | 1:A:883:GLU:HG3   | 2.16                     | 0.45              |
| 3:Y:13:G:H2'    | 3:Y:14:A:H8       | 1.81                     | 0.45              |
| 3:Y:2:C:O2'     | 3:Y:3:U:H5'       | 2.15                     | 0.45              |
| 1:A:545:ASP:HA  | 1:A:699:GLU:OE2   | 2.17                     | 0.45              |
| 1:A:752:HIS:ND1 | 1:A:753:HIS:O     | 2.46                     | 0.45              |
| 2:X:5:A:H2'     | 2:X:6:G:H8        | 1.77                     | 0.45              |
| 1:A:832:LEU:HG  | 1:A:834:THR:HG23  | 1.99                     | 0.45              |
| 2:X:6:G:O2'     | 2:X:7:C:H5'       | 2.16                     | 0.45              |
| 1:A:753:HIS:HA  | 1:A:787:ILE:HB    | 1.99                     | 0.45              |
| 3:Y:10:C:H2'    | 3:Y:11:U:C6       | 2.52                     | 0.45              |
| 3:Y:13:G:H2'    | 3:Y:14:A:C8       | 2.51                     | 0.45              |
| 1:A:728:ARG:NH2 | 1:A:756:GLY:O     | 2.50                     | 0.45              |
| 1:A:547:ARG:O   | 1:A:548:GLU:HB2   | 2.17                     | 0.45              |
| 1:A:750:LYS:O   | 1:A:785:LEU:HD23  | 2.16                     | 0.45              |
| 1:A:445:GLU:OE1 | 1:A:447:HIS:NE2   | 2.48                     | 0.45              |
| 2:X:13:A:O2'    | 2:X:14:G:H5'      | 2.17                     | 0.44              |
| 1:A:307:LEU:O   | 1:A:307:LEU:HD12  | 2.17                     | 0.44              |
| 1:A:883:GLU:O   | 1:A:887:LYS:HG2   | 2.18                     | 0.44              |
| 1:A:792:ALA:HB1 | 1:A:796:LEU:HD21  | 1.99                     | 0.44              |
| 3:Y:4:C:O2'     | 3:Y:5:C:H5'       | 2.17                     | 0.44              |
| 1:A:742:ALA:O   | 1:A:746:GLU:HG3   | 2.18                     | 0.44              |
| 1:A:823:ALA:HB3 | 1:A:828:SER:HB3   | 2.00                     | 0.44              |
| 3:Y:1:U:H2'     | 3:Y:2:C:H6        | 1.82                     | 0.44              |
| 1:A:778:PHE:CD1 | 1:A:786:LEU:HG    | 2.53                     | 0.44              |
| 1:A:450:ASN:O   | 1:A:456:ASN:ND2   | 2.51                     | 0.43              |
| 1:A:509:ASN:O   | 1:A:513:ASN:ND2   | 2.51                     | 0.43              |
| 1:A:962:CYS:HB2 | 1:A:968:TRP:NE1   | 2.33                     | 0.43              |
| 2:X:13:A:H2'    | 2:X:14:G:H8       | 1.83                     | 0.43              |
| 1:A:962:CYS:HB2 | 1:A:968:TRP:CE2   | 2.54                     | 0.43              |
| 1:A:981:CYS:SG  | 1:A:982:LEU:N     | 2.92                     | 0.43              |
| 1:A:899:ASN:HB2 | 1:A:1008:ILE:HG22 | 2.01                     | 0.43              |
| 2:X:7:C:H2'     | 2:X:8:C:H6        | 1.84                     | 0.43              |
| 3:Y:10:C:H2'    | 3:Y:11:U:H6       | 1.83                     | 0.43              |
| 1:A:792:ALA:HB1 | 1:A:796:LEU:CD2   | 2.48                     | 0.43              |
| 1:A:452:GLU:O   | 2:X:10:A:H4'      | 2.19                     | 0.42              |
| 1:A:685:LYS:O   | 1:A:689:LYS:HG2   | 2.18                     | 0.42              |
| 1:A:793:GLU:O   | 1:A:822:ARG:NH2   | 2.51                     | 0.42              |
| 1:A:500:GLN:NE2 | 1:A:860:ARG:HD2   | 2.34                     | 0.42              |

Continued on next page...



Continued from previous page...

| Atom-1           | Atom-2           | Interatomic distance (Å) | Clash overlap (Å) |
|------------------|------------------|--------------------------|-------------------|
| 1:A:307:LEU:HD11 | 1:A:345:LYS:HZ1  | 1.84                     | 0.42              |
| 1:A:551:PHE:O    | 1:A:554:LYS:HB3  | 2.20                     | 0.42              |
| 1:A:778:PHE:O    | 1:A:781:GLY:N    | 2.51                     | 0.42              |
| 1:A:697:GLU:HG3  | 1:A:698:ASN:N    | 2.34                     | 0.42              |
| 1:A:962:CYS:SG   | 1:A:964:CYS:N    | 2.89                     | 0.42              |
| 1:A:705:ARG:NH2  | 1:A:743:LYS:HD2  | 2.27                     | 0.42              |
| 3:Y:6:U:H2'      | 3:Y:7:C:H6       | 1.84                     | 0.42              |
| 1:A:490:ALA:HB3  | 1:A:818:GLN:OE1  | 2.19                     | 0.42              |
| 1:A:796:LEU:O    | 1:A:796:LEU:HD12 | 2.19                     | 0.42              |
| 1:A:371:GLU:OE1  | 1:A:772:LYS:NZ   | 2.42                     | 0.42              |
| 1:A:749:VAL:HG12 | 1:A:785:LEU:CD2  | 2.42                     | 0.42              |
| 2:X:2:U:O2'      | 2:X:3:C:H5'      | 2.20                     | 0.42              |
| 1:A:723:ILE:CD1  | 1:A:785:LEU:HD12 | 2.50                     | 0.41              |
| 3:Y:6:U:H2'      | 3:Y:7:C:C6       | 2.55                     | 0.41              |
| 2:X:9:G:O2'      | 2:X:10:A:H5'     | 2.20                     | 0.41              |
| 1:A:573:ASP:OD1  | 1:A:574:PHE:N    | 2.53                     | 0.41              |
| 2:X:7:C:H2'      | 2:X:8:C:C6       | 2.55                     | 0.41              |
| 1:A:741:ASN:OD1  | 1:A:742:ALA:N    | 2.54                     | 0.41              |
| 1:A:788:ALA:HB1  | 1:A:792:ALA:HB3  | 2.02                     | 0.41              |
| 1:A:459:MET:O    | 1:A:463:LEU:HG   | 2.20                     | 0.41              |
| 1:A:641:VAL:HG11 | 1:A:963:LYS:O    | 2.21                     | 0.41              |
| 1:A:895:GLN:HB3  | 1:A:1007:PRO:HB3 | 2.03                     | 0.40              |
| 1:A:332:THR:HB   | 1:A:824:ARG:HH21 | 1.86                     | 0.40              |
| 1:A:921:HIS:HB3  | 1:A:1013:LEU:HB2 | 2.04                     | 0.40              |
| 1:A:894:LYS:O    | 1:A:895:GLN:HG3  | 2.22                     | 0.40              |

There are no symmetry-related clashes.

## 5.3 Torsion angles [i](#)

### 5.3.1 Protein backbone [i](#)

In the following table, the Percentiles column shows the percent Ramachandran outliers of the chain as a percentile score with respect to all PDB entries followed by that with respect to all EM entries.

The Analysed column shows the number of residues for which the backbone conformation was analysed, and the total number of residues.

| Mol | Chain | Analysed         | Favoured  | Allowed  | Outliers | Percentiles           |
|-----|-------|------------------|-----------|----------|----------|-----------------------|
| 1   | A     | 679 / 1007 (67%) | 611 (90%) | 68 (10%) | 0        | <b>100</b> <b>100</b> |

There are no Ramachandran outliers to report.

### 5.3.2 Protein sidechains [i](#)

In the following table, the Percentiles column shows the percent sidechain outliers of the chain as a percentile score with respect to all PDB entries followed by that with respect to all EM entries.

The Analysed column shows the number of residues for which the sidechain conformation was analysed, and the total number of residues.

| Mol | Chain | Analysed      | Rotameric  | Outliers | Percentiles |
|-----|-------|---------------|------------|----------|-------------|
| 1   | A     | 616/900 (68%) | 613 (100%) | 3 (0%)   | 90   95     |

All (3) residues with a non-rotameric sidechain are listed below:

| Mol | Chain | Res | Type |
|-----|-------|-----|------|
| 1   | A     | 595 | ASN  |
| 1   | A     | 599 | ARG  |
| 1   | A     | 615 | ASN  |

Some sidechains can be flipped to improve hydrogen bonding and reduce clashes. All (6) such sidechains are listed below:

| Mol | Chain | Res | Type |
|-----|-------|-----|------|
| 1   | A     | 448 | HIS  |
| 1   | A     | 595 | ASN  |
| 1   | A     | 768 | GLN  |
| 1   | A     | 784 | ASN  |
| 1   | A     | 899 | ASN  |
| 1   | A     | 927 | HIS  |

### 5.3.3 RNA [i](#)

| Mol | Chain | Analysed    | Backbone Outliers | Pucker Outliers |
|-----|-------|-------------|-------------------|-----------------|
| 2   | X     | 14/15 (93%) | 0                 | 0               |
| 3   | Y     | 14/15 (93%) | 1 (7%)            | 0               |
| All | All   | 28/30 (93%) | 1 (3%)            | 0               |

All (1) RNA backbone outliers are listed below:

| Mol | Chain | Res | Type |
|-----|-------|-----|------|
| 3   | Y     | 11  | U    |

There are no RNA pucker outliers to report.

## 5.4 Non-standard residues in protein, DNA, RNA chains [i](#)

There are no non-standard protein/DNA/RNA residues in this entry.

## 5.5 Carbohydrates [i](#)

There are no carbohydrates in this entry.

## 5.6 Ligand geometry [i](#)

Of 4 ligands modelled in this entry, 2 are monoatomic - leaving 2 for Mogul analysis.

In the following table, the Counts columns list the number of bonds (or angles) for which Mogul statistics could be retrieved, the number of bonds (or angles) that are observed in the model and the number of bonds (or angles) that are defined in the Chemical Component Dictionary. The Link column lists molecule types, if any, to which the group is linked. The Z score for a bond length (or angle) is the number of standard deviations the observed value is removed from the expected value. A bond length (or angle) with  $|Z| > 2$  is considered an outlier worth inspection. RMSZ is the root-mean-square of all Z scores of the bond lengths (or angles).

| Mol | Type | Chain | Res  | Link | Bond lengths |      |          | Bond angles |      |          |
|-----|------|-------|------|------|--------------|------|----------|-------------|------|----------|
|     |      |       |      |      | Counts       | RMSZ | # Z  > 2 | Counts      | RMSZ | # Z  > 2 |
| 4   | ADP  | A     | 1101 | 6    | 25,29,29     | 1.02 | 2 (8%)   | 25,45,45    | 1.89 | 4 (16%)  |
| 5   | ALF  | A     | 1102 | -    | 0,4,4        | 0.00 | -        | 0,6,6       | 0.00 | -        |

In the following table, the Chirals column lists the number of chiral outliers, the number of chiral centers analysed, the number of these observed in the model and the number defined in the Chemical Component Dictionary. Similar counts are reported in the Torsion and Rings columns. '-' means no outliers of that kind were identified.

| Mol | Type | Chain | Res  | Link | Chirals | Torsions   | Rings   |
|-----|------|-------|------|------|---------|------------|---------|
| 4   | ADP  | A     | 1101 | 6    | -       | 0/12/32/32 | 0/3/3/3 |
| 5   | ALF  | A     | 1102 | -    | -       | 0/0/0/0    | 0/0/0/0 |

All (2) bond length outliers are listed below:

| Mol | Chain | Res  | Type | Atoms | Z     | Observed(Å) | Ideal(Å) |
|-----|-------|------|------|-------|-------|-------------|----------|
| 4   | A     | 1101 | ADP  | C8-N9 | -2.07 | 1.34        | 1.36     |
| 4   | A     | 1101 | ADP  | C5-C4 | 2.85  | 1.46        | 1.40     |

All (4) bond angle outliers are listed below:

| Mol | Chain | Res  | Type | Atoms      | Z     | Observed( $^{\circ}$ ) | Ideal( $^{\circ}$ ) |
|-----|-------|------|------|------------|-------|------------------------|---------------------|
| 4   | A     | 1101 | ADP  | N3-C2-N1   | -6.61 | 123.21                 | 128.86              |
| 4   | A     | 1101 | ADP  | PA-O3A-PB  | -4.04 | 119.05                 | 132.63              |
| 4   | A     | 1101 | ADP  | C4-C5-N7   | -2.67 | 106.83                 | 109.41              |
| 4   | A     | 1101 | ADP  | O3B-PB-O2B | 2.00  | 115.51                 | 107.59              |

There are no chirality outliers.

There are no torsion outliers.

There are no ring outliers.

1 monomer is involved in 1 short contact:

| Mol | Chain | Res  | Type | Clashes | Symm-Clashes |
|-----|-------|------|------|---------|--------------|
| 4   | A     | 1101 | ADP  | 1       | 0            |

## 5.7 Other polymers [i](#)

There are no such residues in this entry.

## 5.8 Polymer linkage issues [i](#)

There are no chain breaks in this entry.



# Full wwPDB/EMDataBank EM Map/Model Validation Report ⓘ

May 21, 2018 – 05:11 PM BST

PDB ID : 6GKM  
Title : CryoEM structure of the MDA5-dsRNA filament in complex with ATP (10 mM)  
Deposited on : 2018-05-21  
Resolution : 3.87 Å(reported)

This is a Full wwPDB/EMDataBank EM Map/Model Validation Report.

This report is produced by the wwPDB biocuration pipeline after annotation of the structure.

We welcome your comments at [validation@mail.wwpdb.org](mailto:validation@mail.wwpdb.org)

A user guide is available at

<https://www.wwpdb.org/validation/2017/EMValidationReportHelp>

with specific help available everywhere you see the ⓘ symbol.

---

MolProbity : 4.02b-467  
Mogul : 1.7.3 (157068), CSD as539be (2018)  
Percentile statistics : 20171227.v01 (using entries in the PDB archive December 27th 2017)  
Ideal geometry (proteins) : Engh & Huber (2001)  
Ideal geometry (DNA, RNA) : Parkinson et. al. (1996)  
Validation Pipeline (wwPDB-VP) : rb-20031021

# 1 Overall quality at a glance i

The following experimental techniques were used to determine the structure:  
*ELECTRON MICROSCOPY*

The reported resolution of this entry is 3.87 Å.

Percentile scores (ranging between 0-100) for global validation metrics of the entry are shown in the following graphic. The table shows the number of entries on which the scores are based.

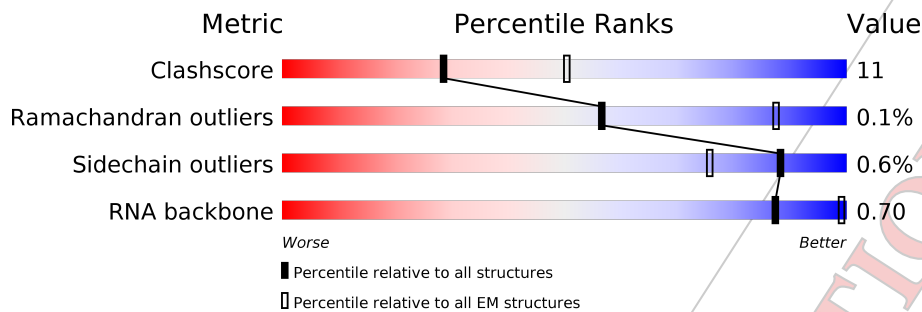

| Metric                | Whole archive (#Entries) | EM structures (#Entries) |
|-----------------------|--------------------------|--------------------------|
| Clashscore            | 136327                   | 1886                     |
| Ramachandran outliers | 132723                   | 1663                     |
| Sidechain outliers    | 132532                   | 1531                     |
| RNA backbone          | 3747                     | 458                      |

The table below summarises the geometric issues observed across the polymeric chains. The red, orange, yellow and green segments on the bar indicate the fraction of residues that contain outliers for  $\geq 3$ , 2, 1 and 0 types of geometric quality criteria. A grey segment represents the fraction of residues that are not modelled. The numeric value for each fraction is indicated below the corresponding segment, with a dot representing fractions  $\leq 5\%$

| Mol | Chain | Length | Quality of chain                      |
|-----|-------|--------|---------------------------------------|
| 1   | A     | 1007   | 55% (green), 13% (yellow), 32% (grey) |
| 2   | X     | 14     | 100% (yellow)                         |
| 3   | Y     | 14     | 7% (green), 86% (yellow), 7% (orange) |

## 2 Entry composition i

There are 5 unique types of molecules in this entry. The entry contains 10562 atoms, of which 4402 are hydrogens and 0 are deuteriums.

In the tables below, the AltConf column contains the number of residues with at least one atom in alternate conformation and the Trace column contains the number of residues modelled with at most 2 atoms.

- Molecule 1 is a protein called Interferon-induced helicase C domain-containing protein 1.

| Mol | Chain | Residues | Atoms |      |      |     |      | AltConf | Trace |   |
|-----|-------|----------|-------|------|------|-----|------|---------|-------|---|
|     |       |          | Total | C    | H    | N   | O    |         |       | S |
| 1   | A     | 689      | 9933  | 3502 | 4402 | 960 | 1034 | 35      | 0     | 0 |

There are 18 discrepancies between the modelled and reference sequences:

| Chain | Residue | Modelled | Actual | Comment  | Reference  |
|-------|---------|----------|--------|----------|------------|
| A     | ?       | -        | ASP    | deletion | UNP Q8R5F7 |
| A     | ?       | -        | LYS    | deletion | UNP Q8R5F7 |
| A     | ?       | -        | SER    | deletion | UNP Q8R5F7 |
| A     | ?       | -        | ASP    | deletion | UNP Q8R5F7 |
| A     | ?       | -        | ASP    | deletion | UNP Q8R5F7 |
| A     | ?       | -        | GLU    | deletion | UNP Q8R5F7 |
| A     | ?       | -        | ALA    | deletion | UNP Q8R5F7 |
| A     | ?       | -        | SER    | deletion | UNP Q8R5F7 |
| A     | ?       | -        | SER    | deletion | UNP Q8R5F7 |
| A     | ?       | -        | CYS    | deletion | UNP Q8R5F7 |
| A     | ?       | -        | ASN    | deletion | UNP Q8R5F7 |
| A     | ?       | -        | ASP    | deletion | UNP Q8R5F7 |
| A     | ?       | -        | GLN    | deletion | UNP Q8R5F7 |
| A     | ?       | -        | LEU    | deletion | UNP Q8R5F7 |
| A     | ?       | -        | LYS    | deletion | UNP Q8R5F7 |
| A     | ?       | -        | GLY    | deletion | UNP Q8R5F7 |
| A     | ?       | -        | ASP    | deletion | UNP Q8R5F7 |
| A     | ?       | -        | VAL    | deletion | UNP Q8R5F7 |

- Molecule 2 is a RNA chain called RNA (5'-R(P\*CP\*AP\*AP\*GP\*CP\*CP\*GP\*AP\*GP\*GP\*AP\*GP\*AP\*G)-3').

| Mol | Chain | Residues | Atoms |     |    |    |    | AltConf | Trace |
|-----|-------|----------|-------|-----|----|----|----|---------|-------|
|     |       |          | Total | C   | N  | O  | P  |         |       |
| 2   | X     | 14       | 308   | 137 | 64 | 93 | 14 | 0       | 0     |

- Molecule 3 is a RNA chain called RNA (5'-R(P\*CP\*UP\*CP\*UP\*CP\*CP\*UP\*CP\*GP\*GP

\*CP\*UP\*UP\*G)-3').

| Mol | Chain | Residues | Atoms |     |    |     |    | AltConf | Trace |
|-----|-------|----------|-------|-----|----|-----|----|---------|-------|
|     |       |          | Total | C   | N  | O   | P  |         |       |
| 3   | Y     | 14       | 289   | 129 | 43 | 103 | 14 | 0       | 0     |

- Molecule 4 is ZINC ION (three-letter code: ZN) (formula: Zn).

| Mol | Chain | Residues | Atoms |    | AltConf |
|-----|-------|----------|-------|----|---------|
|     |       |          | Total | Zn |         |
| 4   | A     | 1        | 1     | 1  | 0       |

- Molecule 5 is ADENOSINE-5'-TRIPHOSPHATE (three-letter code: ATP) (formula: C<sub>10</sub>H<sub>16</sub>N<sub>5</sub>O<sub>13</sub>P<sub>3</sub>).

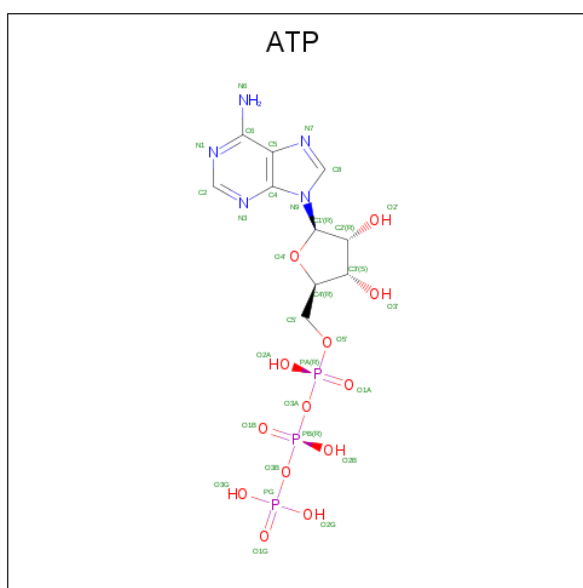

| Mol | Chain | Residues | Atoms |    |   |    |   | AltConf |
|-----|-------|----------|-------|----|---|----|---|---------|
|     |       |          | Total | C  | N | O  | P |         |
| 5   | A     | 1        | 31    | 10 | 5 | 13 | 3 | 0       |





- Molecule 3: RNA (5'-R(P\*CP\*UP\*CP\*UP\*CP\*CP\*UP\*CP\*GP\*GP\*CP\*UP\*UP\*G)-3')

Chain Y:  7% 86% 7%

|    |    |    |    |    |    |    |    |    |     |     |     |     |     |
|----|----|----|----|----|----|----|----|----|-----|-----|-----|-----|-----|
| C1 | U2 | C3 | U4 | C5 | C6 | U7 | C8 | G9 | G10 | C11 | U12 | U13 | G14 |
|----|----|----|----|----|----|----|----|----|-----|-----|-----|-----|-----|

CONFIDENTIAL VALIDATION REPORT

## 4 Experimental information [i](#)

| Property                           | Value                                                 | Source    |
|------------------------------------|-------------------------------------------------------|-----------|
| Reconstruction method              | HELICAL                                               | Depositor |
| Imposed symmetry                   | HELICAL, twist=72.8171°, rise=43.0617 Å, axial sym=C1 | Depositor |
| Number of segments used            | 100482                                                | Depositor |
| Resolution determination method    | FSC 0.143 CUT-OFF                                     | Depositor |
| CTF correction method              | PHASE FLIPPING AND AMPLITUDE CORRECTION               | Depositor |
| Microscope                         | FEI TITAN KRIOS                                       | Depositor |
| Voltage (kV)                       | 300                                                   | Depositor |
| Electron dose ( $e^-/\text{Å}^2$ ) | 30.24                                                 | Depositor |
| Minimum defocus (nm)               | -1700                                                 | Depositor |
| Maximum defocus (nm)               | -3100                                                 | Depositor |
| Magnification                      | 75000                                                 | Depositor |
| Image detector                     | FEI FALCON III (4k x 4k)                              | Depositor |

CONFIDENTIAL

VALIDATION REPORT

## 5 Model quality [i](#)

### 5.1 Standard geometry [i](#)

Bond lengths and bond angles in the following residue types are not validated in this section: ZN, ATP

The Z score for a bond length (or angle) is the number of standard deviations the observed value is removed from the expected value. A bond length (or angle) with  $|Z| > 5$  is considered an outlier worth inspection. RMSZ is the root-mean-square of all Z scores of the bond lengths (or angles).

| Mol | Chain | Bond lengths |         | Bond angles |               |
|-----|-------|--------------|---------|-------------|---------------|
|     |       | RMSZ         | # Z  >2 | RMSZ        | # Z  >2       |
| 1   | A     | 0.38         | 0/5618  | 0.57        | 3/7550 (0.0%) |
| 2   | X     | 0.51         | 0/346   | 0.84        | 0/539         |
| 3   | Y     | 0.53         | 0/319   | 0.88        | 0/493         |
| All | All   | 0.39         | 0/6283  | 0.61        | 3/8582 (0.0%) |

There are no bond length outliers.

All (3) bond angle outliers are listed below:

| Mol | Chain | Res | Type | Atoms  | Z    | Observed(°) | Ideal(°) |
|-----|-------|-----|------|--------|------|-------------|----------|
| 1   | A     | 794 | GLU  | C-N-CA | 8.74 | 140.65      | 122.30   |
| 1   | A     | 497 | ALA  | C-N-CA | 8.58 | 143.16      | 121.70   |
| 1   | A     | 793 | GLU  | C-N-CA | 6.97 | 139.12      | 121.70   |

There are no chirality outliers.

There are no planarity outliers.

### 5.2 Too-close contacts [i](#)

In the following table, the Non-H and H(model) columns list the number of non-hydrogen atoms and hydrogen atoms in the chain respectively. The H(added) column lists the number of hydrogen atoms added and optimized by MolProbity. The Clashes column lists the number of clashes within the asymmetric unit, whereas Symm-Clashes lists symmetry related clashes.

| Mol | Chain | Non-H | H(model) | H(added) | Clashes | Symm-Clashes |
|-----|-------|-------|----------|----------|---------|--------------|
| 1   | A     | 5531  | 4402     | 5655     | 106     | 0            |
| 2   | X     | 308   | 0        | 155      | 25      | 0            |
| 3   | Y     | 289   | 0        | 150      | 23      | 0            |
| 4   | A     | 1     | 0        | 0        | 0       | 0            |
| 5   | A     | 31    | 0        | 12       | 1       | 0            |

*Continued on next page...*

Continued from previous page...

| Mol | Chain | Non-H | H(model) | H(added) | Clashes | Symm-Clashes |
|-----|-------|-------|----------|----------|---------|--------------|
| All | All   | 6160  | 4402     | 5972     | 137     | 0            |

The all-atom clashscore is defined as the number of clashes found per 1000 atoms (including hydrogen atoms). The all-atom clashscore for this structure is 11.

All (137) close contacts within the same asymmetric unit are listed below, sorted by their clash magnitude.

| Atom-1           | Atom-2            | Interatomic distance (Å) | Clash overlap (Å) |
|------------------|-------------------|--------------------------|-------------------|
| 1:A:823:ALA:HB1  | 1:A:828:SER:HB2   | 1.62                     | 0.82              |
| 1:A:476:ASN:HB3  | 1:A:478:PRO:HD2   | 1.61                     | 0.82              |
| 1:A:899:ASN:HB3  | 1:A:902:LEU:HD13  | 1.62                     | 0.80              |
| 1:A:642:LEU:HD22 | 1:A:667:LEU:HD22  | 1.68                     | 0.73              |
| 1:A:336:LYS:NZ   | 5:A:1102:ATP:O3G  | 2.22                     | 0.72              |
| 1:A:724:PHE:HE1  | 1:A:792:ALA:HB3   | 1.56                     | 0.71              |
| 1:A:751:ALA:HB2  | 1:A:785:LEU:HD21  | 1.72                     | 0.71              |
| 1:A:393:GLY:HA2  | 1:A:398:LYS:HD3   | 1.72                     | 0.71              |
| 1:A:748:GLY:O    | 1:A:784:ASN:ND2   | 2.22                     | 0.71              |
| 1:A:970:THR:HG21 | 2:X:3:A:H4'       | 1.74                     | 0.68              |
| 1:A:843:ARG:CZ   | 2:X:12:G:H5'      | 2.22                     | 0.68              |
| 1:A:843:ARG:NH2  | 2:X:11:A:O3'      | 2.26                     | 0.67              |
| 1:A:1019:CYS:SG  | 1:A:1020:LEU:N    | 2.66                     | 0.67              |
| 1:A:962:CYS:SG   | 1:A:963:LYS:N     | 2.69                     | 0.66              |
| 1:A:607:LYS:NZ   | 1:A:762:GLU:OE2   | 2.31                     | 0.63              |
| 1:A:792:ALA:O    | 1:A:822:ARG:NH2   | 2.32                     | 0.62              |
| 1:A:728:ARG:O    | 1:A:731:THR:OG1   | 2.13                     | 0.62              |
| 1:A:929:VAL:HG21 | 1:A:979:LEU:HD12  | 1.80                     | 0.62              |
| 3:Y:13:U:H2'     | 3:Y:14:G:O4'      | 2.00                     | 0.62              |
| 1:A:413:SER:OG   | 1:A:414:THR:O     | 2.14                     | 0.62              |
| 3:Y:3:C:H2'      | 3:Y:4:U:H6        | 1.65                     | 0.61              |
| 1:A:871:HIS:NE2  | 1:A:875:GLU:OE2   | 2.33                     | 0.61              |
| 1:A:974:HIS:HB3  | 1:A:979:LEU:HD21  | 1.83                     | 0.61              |
| 3:Y:2:U:H2'      | 3:Y:3:C:C6        | 2.36                     | 0.60              |
| 1:A:701:LEU:O    | 1:A:705:ARG:HG3   | 2.01                     | 0.60              |
| 1:A:927:HIS:CE1  | 2:X:4:G:H1'       | 2.37                     | 0.60              |
| 1:A:884:LYS:O    | 1:A:888:VAL:HG23  | 2.02                     | 0.60              |
| 1:A:341:VAL:O    | 1:A:344:THR:OG1   | 2.17                     | 0.60              |
| 1:A:932:THR:OG1  | 1:A:934:GLU:OE1   | 2.20                     | 0.59              |
| 1:A:642:LEU:CD2  | 1:A:667:LEU:HD22  | 2.33                     | 0.59              |
| 1:A:323:GLY:O    | 1:A:484:GLN:NE2   | 2.36                     | 0.59              |
| 3:Y:3:C:H2'      | 3:Y:4:U:C6        | 2.38                     | 0.58              |
| 1:A:899:ASN:HB2  | 1:A:1008:ILE:HG21 | 1.85                     | 0.58              |

Continued on next page...

Continued from previous page...

| Atom-1           | Atom-2           | Interatomic distance (Å) | Clash overlap (Å) |
|------------------|------------------|--------------------------|-------------------|
| 1:A:981:CYS:SG   | 1:A:982:LEU:N    | 2.77                     | 0.58              |
| 2:X:1:C:H2'      | 2:X:2:A:H8       | 1.69                     | 0.57              |
| 1:A:633:ASP:OD1  | 1:A:942:ARG:NH2  | 2.35                     | 0.57              |
| 1:A:578:HIS:ND1  | 2:X:14:G:H4'     | 2.20                     | 0.56              |
| 1:A:926:MET:CE   | 2:X:5:C:H1'      | 2.35                     | 0.56              |
| 1:A:927:HIS:HE1  | 2:X:4:G:H1'      | 1.71                     | 0.56              |
| 2:X:11:A:H2'     | 2:X:12:G:C8      | 2.40                     | 0.56              |
| 3:Y:7:U:O2'      | 3:Y:8:C:H5'      | 2.06                     | 0.56              |
| 2:X:1:C:H2'      | 2:X:2:A:C8       | 2.42                     | 0.55              |
| 1:A:843:ARG:NH2  | 2:X:12:G:H5'     | 2.22                     | 0.55              |
| 3:Y:4:U:H2'      | 3:Y:5:C:H6       | 1.71                     | 0.55              |
| 1:A:724:PHE:CE1  | 1:A:792:ALA:HB3  | 2.40                     | 0.54              |
| 1:A:791:VAL:HG23 | 3:Y:7:U:H5''     | 1.88                     | 0.54              |
| 3:Y:1:C:H2'      | 3:Y:2:U:C6       | 2.42                     | 0.54              |
| 3:Y:9:G:H2'      | 3:Y:10:G:C8      | 2.43                     | 0.54              |
| 3:Y:1:C:H2'      | 3:Y:2:U:H6       | 1.73                     | 0.54              |
| 1:A:742:ALA:O    | 1:A:746:GLU:HG3  | 2.08                     | 0.53              |
| 2:X:11:A:H2'     | 2:X:12:G:H8      | 1.73                     | 0.53              |
| 1:A:962:CYS:HB2  | 1:A:968:TRP:CE2  | 2.43                     | 0.53              |
| 1:A:750:LYS:H    | 1:A:784:ASN:HD22 | 1.56                     | 0.53              |
| 1:A:750:LYS:O    | 1:A:784:ASN:N    | 2.42                     | 0.52              |
| 1:A:752:HIS:HB2  | 1:A:783:ILE:HG12 | 1.91                     | 0.52              |
| 1:A:791:VAL:CG2  | 3:Y:7:U:H5''     | 2.38                     | 0.52              |
| 1:A:979:LEU:HD23 | 1:A:979:LEU:H    | 1.73                     | 0.52              |
| 3:Y:8:C:H2'      | 3:Y:9:G:H8       | 1.74                     | 0.52              |
| 1:A:1015:TYR:O   | 1:A:1019:CYS:HB3 | 2.10                     | 0.52              |
| 1:A:637:LYS:O    | 1:A:641:VAL:HG23 | 2.11                     | 0.51              |
| 1:A:728:ARG:NH2  | 3:Y:7:U:OP2      | 2.40                     | 0.51              |
| 1:A:899:ASN:HB2  | 1:A:1008:ILE:CG2 | 2.40                     | 0.51              |
| 1:A:425:LEU:HB2  | 1:A:432:GLY:HA3  | 1.92                     | 0.51              |
| 1:A:568:LYS:HE2  | 1:A:598:ASP:OD1  | 2.11                     | 0.51              |
| 1:A:544:ASP:OD1  | 1:A:545:ASP:N    | 2.43                     | 0.51              |
| 3:Y:8:C:H2'      | 3:Y:9:G:C8       | 2.46                     | 0.51              |
| 1:A:445:GLU:OE1  | 1:A:447:HIS:NE2  | 2.43                     | 0.50              |
| 2:X:4:G:O2'      | 2:X:5:C:H5'      | 2.12                     | 0.50              |
| 1:A:307:LEU:HG   | 1:A:308:GLN:HG2  | 1.92                     | 0.50              |
| 1:A:399:ILE:HG13 | 1:A:400:SER:N    | 2.27                     | 0.49              |
| 1:A:806:ARG:NH1  | 1:A:830:TYR:OH   | 2.46                     | 0.49              |
| 1:A:962:CYS:HB2  | 1:A:968:TRP:NE1  | 2.28                     | 0.49              |
| 1:A:749:VAL:HG13 | 1:A:785:LEU:HD22 | 1.94                     | 0.49              |
| 3:Y:4:U:H2'      | 3:Y:5:C:C6       | 2.47                     | 0.49              |

Continued on next page...

Continued from previous page...

| Atom-1           | Atom-2           | Interatomic distance (Å) | Clash overlap (Å) |
|------------------|------------------|--------------------------|-------------------|
| 1:A:685:LYS:O    | 1:A:689:LYS:HG2  | 2.13                     | 0.48              |
| 2:X:5:C:O2'      | 2:X:6:C:H5'      | 2.14                     | 0.48              |
| 1:A:750:LYS:HD2  | 1:A:782:GLU:O    | 2.13                     | 0.48              |
| 2:X:8:A:H2'      | 2:X:9:G:H8       | 1.78                     | 0.48              |
| 1:A:332:THR:O    | 1:A:824:ARG:NH2  | 2.46                     | 0.48              |
| 1:A:803:ILE:O    | 1:A:805:ILE:HG23 | 2.13                     | 0.48              |
| 2:X:10:G:H2'     | 2:X:11:A:H8      | 1.79                     | 0.48              |
| 1:A:389:ILE:HD11 | 1:A:397:LEU:HD13 | 1.96                     | 0.47              |
| 1:A:824:ARG:N    | 1:A:824:ARG:HD2  | 2.28                     | 0.47              |
| 1:A:901:SER:C    | 1:A:902:LEU:HD12 | 2.34                     | 0.47              |
| 1:A:336:LYS:HG2  | 1:A:488:LEU:HD23 | 1.95                     | 0.47              |
| 3:Y:2:U:H2'      | 3:Y:3:C:H6       | 1.76                     | 0.47              |
| 1:A:944:ASN:O    | 1:A:948:GLN:HB2  | 2.14                     | 0.47              |
| 3:Y:10:G:O2'     | 3:Y:11:C:H5'     | 2.14                     | 0.47              |
| 1:A:573:ASP:OD1  | 1:A:574:PHE:N    | 2.48                     | 0.47              |
| 1:A:393:GLY:HA2  | 1:A:398:LYS:CD   | 2.43                     | 0.46              |
| 1:A:327:ILE:HD11 | 1:A:514:LEU:HD12 | 1.97                     | 0.46              |
| 1:A:572:SER:OG   | 1:A:573:ASP:N    | 2.45                     | 0.46              |
| 1:A:497:ALA:HB1  | 1:A:502:GLU:HB2  | 1.96                     | 0.46              |
| 2:X:7:G:O2'      | 2:X:8:A:H5'      | 2.16                     | 0.46              |
| 1:A:336:LYS:CG   | 1:A:488:LEU:HD23 | 2.47                     | 0.45              |
| 2:X:8:A:H2'      | 2:X:9:G:C8       | 2.52                     | 0.45              |
| 1:A:399:ILE:HG13 | 1:A:400:SER:H    | 1.82                     | 0.45              |
| 1:A:926:MET:HE3  | 2:X:5:C:H1'      | 1.98                     | 0.45              |
| 1:A:974:HIS:CB   | 1:A:979:LEU:HD21 | 2.46                     | 0.44              |
| 1:A:731:THR:HG22 | 1:A:787:ILE:HG22 | 2.00                     | 0.44              |
| 1:A:929:VAL:HG21 | 1:A:979:LEU:CD1  | 2.45                     | 0.44              |
| 1:A:811:THR:O    | 2:X:11:A:H4'     | 2.17                     | 0.44              |
| 2:X:13:A:H2'     | 2:X:14:G:C8      | 2.52                     | 0.44              |
| 2:X:5:C:H2'      | 2:X:6:C:C6       | 2.52                     | 0.44              |
| 1:A:826:ASP:OD1  | 1:A:827:GLU:N    | 2.46                     | 0.44              |
| 1:A:711:GLN:OE1  | 1:A:714:ARG:NH2  | 2.51                     | 0.44              |
| 1:A:511:CYS:SG   | 1:A:519:ILE:HD11 | 2.58                     | 0.43              |
| 1:A:884:LYS:O    | 1:A:887:LYS:HB2  | 2.17                     | 0.43              |
| 1:A:544:ASP:O    | 1:A:699:GLU:HG2  | 2.17                     | 0.43              |
| 1:A:617:THR:O    | 1:A:807:TYR:OH   | 2.35                     | 0.43              |
| 1:A:826:ASP:O    | 1:A:827:GLU:HB2  | 2.18                     | 0.43              |
| 1:A:698:ASN:OD1  | 1:A:699:GLU:N    | 2.52                     | 0.43              |
| 1:A:944:ASN:H    | 1:A:955:GLN:HG2  | 1.84                     | 0.43              |
| 1:A:338:ARG:NE   | 1:A:381:TYR:HE2  | 2.16                     | 0.43              |
| 1:A:878:VAL:O    | 1:A:882:LEU:HD13 | 2.19                     | 0.43              |

Continued on next page...

Continued from previous page...

| Atom-1           | Atom-2           | Interatomic distance (Å) | Clash overlap (Å) |
|------------------|------------------|--------------------------|-------------------|
| 1:A:973:VAL:O    | 3:Y:14:G:H4'     | 2.19                     | 0.43              |
| 1:A:550:PRO:O    | 1:A:554:LYS:HB2  | 2.18                     | 0.43              |
| 2:X:10:G:H2'     | 2:X:11:A:C8      | 2.53                     | 0.43              |
| 3:Y:10:G:C2'     | 3:Y:11:C:H5'     | 2.49                     | 0.42              |
| 1:A:796:LEU:O    | 1:A:796:LEU:HD12 | 2.19                     | 0.42              |
| 1:A:711:GLN:HE22 | 1:A:714:ARG:HH21 | 1.67                     | 0.42              |
| 1:A:750:LYS:O    | 1:A:785:LEU:HD23 | 2.19                     | 0.42              |
| 1:A:614:ILE:O    | 1:A:618:ILE:N    | 2.43                     | 0.42              |
| 1:A:726:LYS:NZ   | 3:Y:5:C:O2'      | 2.50                     | 0.42              |
| 1:A:974:HIS:HB3  | 1:A:979:LEU:CD2  | 2.48                     | 0.42              |
| 1:A:714:ARG:NH2  | 1:A:827:GLU:O    | 2.52                     | 0.42              |
| 1:A:333:GLY:HA3  | 1:A:824:ARG:HH12 | 1.85                     | 0.41              |
| 1:A:313:GLN:NE2  | 1:A:334:SER:O    | 2.49                     | 0.41              |
| 3:Y:5:C:O2'      | 3:Y:6:C:H5'      | 2.21                     | 0.41              |
| 1:A:793:GLU:O    | 1:A:794:GLU:HG3  | 2.19                     | 0.41              |
| 1:A:759:HIS:CE1  | 2:X:5:C:H41      | 2.38                     | 0.41              |
| 1:A:714:ARG:NH2  | 1:A:827:GLU:HB3  | 2.36                     | 0.41              |
| 1:A:618:ILE:HG22 | 1:A:619:ARG:N    | 2.35                     | 0.41              |
| 3:Y:6:C:O2'      | 3:Y:7:U:H5'      | 2.20                     | 0.40              |
| 3:Y:9:G:H2'      | 3:Y:10:G:H8      | 1.86                     | 0.40              |
| 1:A:393:GLY:HA2  | 1:A:398:LYS:CE   | 2.51                     | 0.40              |
| 1:A:926:MET:HE2  | 2:X:5:C:H1'      | 2.02                     | 0.40              |

There are no symmetry-related clashes.

## 5.3 Torsion angles [i](#)

### 5.3.1 Protein backbone [i](#)

In the following table, the Percentiles column shows the percent Ramachandran outliers of the chain as a percentile score with respect to all PDB entries followed by that with respect to all EM entries.

The Analysed column shows the number of residues for which the backbone conformation was analysed, and the total number of residues.

| Mol | Chain | Analysed       | Favoured  | Allowed  | Outliers | Percentiles |
|-----|-------|----------------|-----------|----------|----------|-------------|
| 1   | A     | 681/1007 (68%) | 614 (90%) | 66 (10%) | 1 (0%)   | 53 86       |

All (1) Ramachandran outliers are listed below:



| Mol | Chain | Res | Type |
|-----|-------|-----|------|
| 1   | A     | 826 | ASP  |

### 5.3.2 Protein sidechains [i](#)

In the following table, the Percentiles column shows the percent sidechain outliers of the chain as a percentile score with respect to all PDB entries followed by that with respect to all EM entries.

The Analysed column shows the number of residues for which the sidechain conformation was analysed, and the total number of residues.

| Mol | Chain | Analysed      | Rotameric | Outliers | Percentiles |
|-----|-------|---------------|-----------|----------|-------------|
| 1   | A     | 617/900 (69%) | 613 (99%) | 4 (1%)   | 87 94       |

All (4) residues with a non-rotameric sidechain are listed below:

| Mol | Chain | Res | Type |
|-----|-------|-----|------|
| 1   | A     | 595 | ASN  |
| 1   | A     | 599 | ARG  |
| 1   | A     | 615 | ASN  |
| 1   | A     | 945 | LYS  |

Some sidechains can be flipped to improve hydrogen bonding and reduce clashes. All (5) such sidechains are listed below:

| Mol | Chain | Res | Type |
|-----|-------|-----|------|
| 1   | A     | 420 | ASN  |
| 1   | A     | 595 | ASN  |
| 1   | A     | 678 | ASN  |
| 1   | A     | 784 | ASN  |
| 1   | A     | 957 | ASN  |

### 5.3.3 RNA [i](#)

| Mol | Chain | Analysed    | Backbone Outliers | Pucker Outliers |
|-----|-------|-------------|-------------------|-----------------|
| 2   | X     | 13/14 (92%) | 0                 | 0               |
| 3   | Y     | 13/14 (92%) | 1 (7%)            | 0               |
| All | All   | 26/28 (92%) | 1 (3%)            | 0               |

All (1) RNA backbone outliers are listed below:

| Mol | Chain | Res | Type |
|-----|-------|-----|------|
| 3   | Y     | 14  | G    |

There are no RNA pucker outliers to report.

#### 5.4 Non-standard residues in protein, DNA, RNA chains [i](#)

There are no non-standard protein/DNA/RNA residues in this entry.

#### 5.5 Carbohydrates [i](#)

There are no carbohydrates in this entry.

#### 5.6 Ligand geometry [i](#)

Of 2 ligands modelled in this entry, 1 is monoatomic - leaving 1 for Mogul analysis.

In the following table, the Counts columns list the number of bonds (or angles) for which Mogul statistics could be retrieved, the number of bonds (or angles) that are observed in the model and the number of bonds (or angles) that are defined in the Chemical Component Dictionary. The Link column lists molecule types, if any, to which the group is linked. The Z score for a bond length (or angle) is the number of standard deviations the observed value is removed from the expected value. A bond length (or angle) with  $|Z| > 2$  is considered an outlier worth inspection. RMSZ is the root-mean-square of all Z scores of the bond lengths (or angles).

| Mol | Type | Chain | Res  | Link | Bond lengths |      |          | Bond angles |      |          |
|-----|------|-------|------|------|--------------|------|----------|-------------|------|----------|
|     |      |       |      |      | Counts       | RMSZ | # Z  > 2 | Counts      | RMSZ | # Z  > 2 |
| 5   | ATP  | A     | 1102 | -    | 27,33,33     | 0.97 | 1 (3%)   | 27,52,52    | 2.02 | 4 (14%)  |

In the following table, the Chirals column lists the number of chiral outliers, the number of chiral centers analysed, the number of these observed in the model and the number defined in the Chemical Component Dictionary. Similar counts are reported in the Torsion and Rings columns. '-' means no outliers of that kind were identified.

| Mol | Type | Chain | Res  | Link | Chirals | Torsions   | Rings   |
|-----|------|-------|------|------|---------|------------|---------|
| 5   | ATP  | A     | 1102 | -    | -       | 0/18/38/38 | 0/3/3/3 |

All (1) bond length outliers are listed below:

| Mol | Chain | Res  | Type | Atoms | Z    | Observed(Å) | Ideal(Å) |
|-----|-------|------|------|-------|------|-------------|----------|
| 5   | A     | 1102 | ATP  | C5-C4 | 2.74 | 1.46        | 1.40     |

All (4) bond angle outliers are listed below:

| Mol | Chain | Res  | Type | Atoms     | Z     | Observed(°) | Ideal(°) |
|-----|-------|------|------|-----------|-------|-------------|----------|
| 5   | A     | 1102 | ATP  | N3-C2-N1  | -6.72 | 123.12      | 128.86   |
| 5   | A     | 1102 | ATP  | PA-O3A-PB | -4.09 | 118.88      | 132.63   |
| 5   | A     | 1102 | ATP  | PB-O3B-PG | -3.55 | 120.71      | 132.63   |
| 5   | A     | 1102 | ATP  | C4-C5-N7  | -2.68 | 106.82      | 109.41   |

There are no chirality outliers.

There are no torsion outliers.

There are no ring outliers.

1 monomer is involved in 1 short contact:

| Mol | Chain | Res  | Type | Clashes | Symm-Clashes |
|-----|-------|------|------|---------|--------------|
| 5   | A     | 1102 | ATP  | 1       | 0            |

## 5.7 Other polymers [i](#)

There are no such residues in this entry.

## 5.8 Polymer linkage issues [i](#)

There are no chain breaks in this entry.



## Full wwPDB/EMDataBank EM Map/Model Validation Report ⓘ

Jul 30, 2018 – 03:26 PM BST

PDB ID : 6H61  
EMDB ID: : 4338  
Title : CryoEM structure of the MDA5-dsRNA filament with 89 degree twist and  
without nucleotide  
Deposited on : 2018-07-25  
Resolution : 4.02 Å(reported)  
Based on PDB ID : 6G1S

This is a Full wwPDB/EMDataBank EM Map/Model Validation Report.

This report is produced by the wwPDB biocuration pipeline after annotation of the structure.

We welcome your comments at [validation@mail.wwpdb.org](mailto:validation@mail.wwpdb.org)

A user guide is available at

<https://www.wwpdb.org/validation/2017/EMValidationReportHelp>

with specific help available everywhere you see the ⓘ symbol.

---

MolProbity : 4.02b-467  
Percentile statistics : 20171227.v01 (using entries in the PDB archive December 27th 2017)  
Ideal geometry (proteins) : Engh & Huber (2001)  
Ideal geometry (DNA, RNA) : Parkinson et. al. (1996)  
Validation Pipeline (wwPDB-VP) : rb-20031172

# 1 Overall quality at a glance i

The following experimental techniques were used to determine the structure:  
*ELECTRON MICROSCOPY*

The reported resolution of this entry is 4.02 Å.

Percentile scores (ranging between 0-100) for global validation metrics of the entry are shown in the following graphic. The table shows the number of entries on which the scores are based.

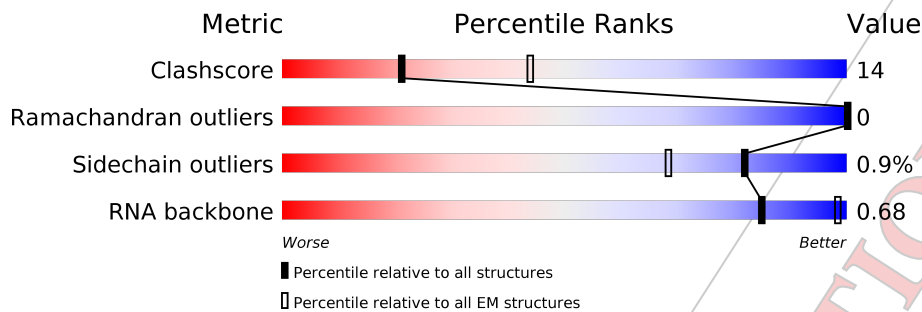

| Metric                | Whole archive (#Entries) | EM structures (#Entries) |
|-----------------------|--------------------------|--------------------------|
| Clashscore            | 136327                   | 1886                     |
| Ramachandran outliers | 132723                   | 1663                     |
| Sidechain outliers    | 132532                   | 1531                     |
| RNA backbone          | 3747                     | 458                      |

The table below summarises the geometric issues observed across the polymeric chains. The red, orange, yellow and green segments on the bar indicate the fraction of residues that contain outliers for  $\geq 3$ , 2, 1 and 0 types of geometric quality criteria. A grey segment represents the fraction of residues that are not modelled. The numeric value for each fraction is indicated below the corresponding segment, with a dot representing fractions  $\leq 5\%$

| Mol | Chain | Length | Quality of chain                      |
|-----|-------|--------|---------------------------------------|
| 1   | A     | 1007   | 49% (green), 16% (yellow), 34% (grey) |
| 2   | X     | 15     | 93% (yellow), 7% (orange)             |
| 3   | Y     | 15     | 7% (green), 93% (yellow)              |

## 2 Entry composition i

There are 4 unique types of molecules in this entry. The entry contains 9912 atoms, of which 4057 are hydrogens and 0 are deuteriums.

In the tables below, the AltConf column contains the number of residues with at least one atom in alternate conformation and the Trace column contains the number of residues modelled with at most 2 atoms.

- Molecule 1 is a protein called Interferon-induced helicase C domain-containing protein 1.

| Mol | Chain | Residues | Atoms |      |      |     |     |    | AltConf | Trace |
|-----|-------|----------|-------|------|------|-----|-----|----|---------|-------|
|     |       |          | Total | C    | H    | N   | O   | S  |         |       |
| 1   | A     | 660      | 9272  | 3312 | 4057 | 911 | 959 | 33 | 0       | 0     |

There are 18 discrepancies between the modelled and reference sequences:

| Chain | Residue | Modelled | Actual | Comment  | Reference  |
|-------|---------|----------|--------|----------|------------|
| A     | ?       | -        | ASP    | deletion | UNP Q8R5F7 |
| A     | ?       | -        | LYS    | deletion | UNP Q8R5F7 |
| A     | ?       | -        | SER    | deletion | UNP Q8R5F7 |
| A     | ?       | -        | ASP    | deletion | UNP Q8R5F7 |
| A     | ?       | -        | ASP    | deletion | UNP Q8R5F7 |
| A     | ?       | -        | GLU    | deletion | UNP Q8R5F7 |
| A     | ?       | -        | ALA    | deletion | UNP Q8R5F7 |
| A     | ?       | -        | SER    | deletion | UNP Q8R5F7 |
| A     | ?       | -        | SER    | deletion | UNP Q8R5F7 |
| A     | ?       | -        | CYS    | deletion | UNP Q8R5F7 |
| A     | ?       | -        | ASN    | deletion | UNP Q8R5F7 |
| A     | ?       | -        | ASP    | deletion | UNP Q8R5F7 |
| A     | ?       | -        | GLN    | deletion | UNP Q8R5F7 |
| A     | ?       | -        | LEU    | deletion | UNP Q8R5F7 |
| A     | ?       | -        | LYS    | deletion | UNP Q8R5F7 |
| A     | ?       | -        | GLY    | deletion | UNP Q8R5F7 |
| A     | ?       | -        | ASP    | deletion | UNP Q8R5F7 |
| A     | ?       | -        | VAL    | deletion | UNP Q8R5F7 |

- Molecule 2 is a RNA chain called RNA (5'-R(P\*UP\*CP\*CP\*AP\*UP\*GP\*CP\*GP\*CP\*AP\*UP\*GP\*AP\*CP\*G)-3').

| Mol | Chain | Residues | Atoms |     |    |     |    | AltConf | Trace |
|-----|-------|----------|-------|-----|----|-----|----|---------|-------|
|     |       |          | Total | C   | N  | O   | P  |         |       |
| 2   | X     | 15       | 318   | 142 | 56 | 105 | 15 | 0       | 0     |

- Molecule 3 is a RNA chain called RNA (5'-R(P\*CP\*GP\*UP\*CP\*AP\*UP\*GP\*CP\*GP\*CP

\*AP\*UP\*GP\*GP\*A)-3').

| Mol | Chain | Residues | Atoms |     |    |     |    | AltConf | Trace |
|-----|-------|----------|-------|-----|----|-----|----|---------|-------|
|     |       |          | Total | C   | N  | O   | P  |         |       |
| 3   | Y     | 15       | 321   | 143 | 58 | 105 | 15 | 0       | 0     |

- Molecule 4 is ZINC ION (three-letter code: ZN) (formula: Zn).

| Mol | Chain | Residues | Atoms |    | AltConf |
|-----|-------|----------|-------|----|---------|
|     |       |          | Total | Zn |         |
| 4   | A     | 1        | 1     | 1  | 0       |

CONFIDENTIAL VALIDATION REPORT





U1  
C2  
C3  
A4  
U5  
G6  
C7  
G8  
C9  
A10  
U11  
G12  
A13  
C14  
G15

- Molecule 3: RNA (5'-R(P\*CP\*GP\*UP\*CP\*AP\*UP\*GP\*CP\*GP\*CP\*AP\*UP\*GP\*GP\*A)-3'  
)

Chain Y:  7% 93%

C1  
G2  
U3  
C4  
A5  
U6  
C7  
G8  
C9  
A10  
U11  
G12  
A13  
C14  
A15

CONFIDENTIAL VALIDATION REPORT

## 4 Experimental information i

| Property                           | Value                                                | Source    |
|------------------------------------|------------------------------------------------------|-----------|
| Reconstruction method              | HELICAL                                              | Depositor |
| Imposed symmetry                   | HELICAL, twist=89.000°, rise=44.2416 Å, axial sym=C1 | Depositor |
| Number of segments used            | 26527                                                | Depositor |
| Resolution determination method    | FSC 0.143 CUT-OFF                                    | Depositor |
| CTF correction method              | PHASE FLIPPING AND AMPLITUDE CORRECTION              | Depositor |
| Microscope                         | FEI TITAN KRIOS                                      | Depositor |
| Voltage (kV)                       | 300                                                  | Depositor |
| Electron dose ( $e^-/\text{Å}^2$ ) | 27.0                                                 | Depositor |
| Minimum defocus (nm)               | -1800                                                | Depositor |
| Maximum defocus (nm)               | -2700                                                | Depositor |
| Magnification                      | 75000                                                | Depositor |
| Image detector                     | FEI FALCON III (4k x 4k)                             | Depositor |

CONFIDENTIAL

VALIDATION REPORT

## 5 Model quality [i](#)

### 5.1 Standard geometry [i](#)

Bond lengths and bond angles in the following residue types are not validated in this section:  
ZN

The Z score for a bond length (or angle) is the number of standard deviations the observed value is removed from the expected value. A bond length (or angle) with  $|Z| > 5$  is considered an outlier worth inspection. RMSZ is the root-mean-square of all Z scores of the bond lengths (or angles).

| Mol | Chain | Bond lengths |         | Bond angles |               |
|-----|-------|--------------|---------|-------------|---------------|
|     |       | RMSZ         | # Z  >2 | RMSZ        | # Z  >2       |
| 1   | A     | 0.37         | 0/5293  | 0.53        | 1/7121 (0.0%) |
| 2   | X     | 0.58         | 0/354   | 0.87        | 0/549         |
| 3   | Y     | 0.61         | 0/358   | 0.92        | 0/556         |
| All | All   | 0.40         | 0/6005  | 0.60        | 1/8226 (0.0%) |

Chiral center outliers are detected by calculating the chiral volume of a chiral center and verifying if the center is modelled as a planar moiety or with the opposite hand. A planarity outlier is detected by checking planarity of atoms in a peptide group, atoms in a mainchain group or atoms of a sidechain that are expected to be planar.

| Mol | Chain | #Chirality outliers | #Planarity outliers |
|-----|-------|---------------------|---------------------|
| 1   | A     | 0                   | 1                   |

There are no bond length outliers.

All (1) bond angle outliers are listed below:

| Mol | Chain | Res | Type | Atoms  | Z    | Observed(°) | Ideal(°) |
|-----|-------|-----|------|--------|------|-------------|----------|
| 1   | A     | 497 | ALA  | C-N-CA | 8.18 | 142.14      | 121.70   |

There are no chirality outliers.

All (1) planarity outliers are listed below:

| Mol | Chain | Res | Type | Group   |
|-----|-------|-----|------|---------|
| 1   | A     | 760 | SER  | Peptide |

### 5.2 Too-close contacts [i](#)

In the following table, the Non-H and H(model) columns list the number of non-hydrogen atoms and hydrogen atoms in the chain respectively. The H(added) column lists the number of hydrogen

atoms added and optimized by MolProbity. The Clashes column lists the number of clashes within the asymmetric unit, whereas Symm-Clashes lists symmetry related clashes.

| Mol | Chain | Non-H | H(model) | H(added) | Clashes | Symm-Clashes |
|-----|-------|-------|----------|----------|---------|--------------|
| 1   | A     | 5215  | 4057     | 5282     | 117     | 0            |
| 2   | X     | 318   | 0        | 163      | 34      | 0            |
| 3   | Y     | 321   | 0        | 163      | 23      | 0            |
| 4   | A     | 1     | 0        | 0        | 0       | 0            |
| All | All   | 5855  | 4057     | 5608     | 164     | 0            |

The all-atom clashscore is defined as the number of clashes found per 1000 atoms (including hydrogen atoms). The all-atom clashscore for this structure is 14.

All (164) close contacts within the same asymmetric unit are listed below, sorted by their clash magnitude.

| Atom-1           | Atom-2           | Interatomic distance (Å) | Clash overlap (Å) |
|------------------|------------------|--------------------------|-------------------|
| 1:A:720:ARG:NH1  | 1:A:778:PHE:O    | 2.16                     | 0.78              |
| 1:A:374:PHE:O    | 1:A:379:ASN:ND2  | 2.19                     | 0.75              |
| 1:A:323:GLY:O    | 1:A:484:GLN:NE2  | 2.21                     | 0.74              |
| 1:A:750:LYS:H    | 1:A:784:ASN:HD22 | 1.36                     | 0.74              |
| 1:A:359:LYS:NZ   | 1:A:407:SER:O    | 2.21                     | 0.73              |
| 1:A:806:ARG:HD2  | 1:A:809:LEU:HD23 | 1.70                     | 0.72              |
| 1:A:962:CYS:SG   | 1:A:963:LYS:N    | 2.63                     | 0.71              |
| 3:Y:1:C:H2'      | 3:Y:2:G:C8       | 2.28                     | 0.69              |
| 1:A:472:LEU:O    | 1:A:476:ASN:N    | 2.26                     | 0.69              |
| 2:X:3:C:H2'      | 2:X:4:A:C8       | 2.29                     | 0.68              |
| 1:A:727:THR:O    | 1:A:730:SER:OG   | 2.11                     | 0.68              |
| 1:A:599:ARG:NH1  | 1:A:909:ASN:OD1  | 2.25                     | 0.68              |
| 3:Y:3:U:H2'      | 3:Y:4:C:C6       | 2.29                     | 0.68              |
| 1:A:909:ASN:ND2  | 1:A:966:GLN:OE1  | 2.27                     | 0.68              |
| 3:Y:1:C:H2'      | 3:Y:2:G:H8       | 1.60                     | 0.67              |
| 1:A:723:ILE:HD11 | 1:A:785:LEU:HD21 | 1.75                     | 0.67              |
| 1:A:341:VAL:O    | 1:A:344:THR:OG1  | 2.13                     | 0.67              |
| 2:X:5:U:H2'      | 2:X:6:G:H8       | 1.60                     | 0.66              |
| 3:Y:4:C:H2'      | 3:Y:5:A:C8       | 2.31                     | 0.65              |
| 1:A:351:LYS:O    | 1:A:355:SER:N    | 2.29                     | 0.65              |
| 1:A:425:LEU:HB2  | 1:A:433:VAL:H    | 1.61                     | 0.64              |
| 1:A:590:ALA:HB3  | 1:A:599:ARG:HB3  | 1.79                     | 0.64              |
| 1:A:624:TYR:CZ   | 1:A:688:LYS:HB2  | 2.33                     | 0.64              |
| 2:X:2:C:H2'      | 2:X:3:C:H6       | 1.64                     | 0.63              |
| 1:A:747:VAL:HG12 | 1:A:749:VAL:HG23 | 1.81                     | 0.63              |
| 1:A:563:GLN:NE2  | 1:A:568:LYS:O    | 2.32                     | 0.62              |
| 2:X:9:C:H2'      | 2:X:10:A:C8      | 2.33                     | 0.62              |

*Continued on next page...*

Continued from previous page...

| Atom-1           | Atom-2           | Interatomic distance (Å) | Clash overlap (Å) |
|------------------|------------------|--------------------------|-------------------|
| 1:A:753:HIS:HA   | 1:A:787:ILE:HB   | 1.81                     | 0.62              |
| 3:Y:2:G:O2'      | 3:Y:3:U:H5'      | 1.98                     | 0.62              |
| 2:X:5:U:H2'      | 2:X:6:G:C8       | 2.35                     | 0.62              |
| 1:A:399:ILE:HD12 | 1:A:403:GLU:HB2  | 1.80                     | 0.62              |
| 2:X:1:U:H2'      | 2:X:2:C:C6       | 2.35                     | 0.62              |
| 1:A:885:LYS:O    | 1:A:889:LYS:HG2  | 2.00                     | 0.61              |
| 1:A:471:ASP:O    | 1:A:475:GLN:HB2  | 1.99                     | 0.61              |
| 1:A:509:ASN:O    | 1:A:513:ASN:ND2  | 2.34                     | 0.61              |
| 2:X:11:U:H2'     | 2:X:12:G:C8      | 2.35                     | 0.61              |
| 1:A:927:HIS:NE2  | 2:X:5:U:O2'      | 2.28                     | 0.60              |
| 2:X:3:C:H2'      | 2:X:4:A:H8       | 1.64                     | 0.60              |
| 1:A:558:ILE:O    | 1:A:561:SER:OG   | 2.14                     | 0.60              |
| 1:A:710:GLU:O    | 1:A:714:ARG:HG3  | 2.01                     | 0.60              |
| 1:A:791:VAL:CG2  | 3:Y:7:G:H5''     | 2.31                     | 0.60              |
| 2:X:9:C:H2'      | 2:X:10:A:H8      | 1.66                     | 0.60              |
| 1:A:962:CYS:HB3  | 1:A:966:GLN:H    | 1.66                     | 0.60              |
| 2:X:11:U:H2'     | 2:X:12:G:H8      | 1.66                     | 0.59              |
| 1:A:399:ILE:HD12 | 1:A:403:GLU:CB   | 2.32                     | 0.59              |
| 1:A:457:ASN:OD1  | 1:A:460:ARG:NH2  | 2.36                     | 0.59              |
| 1:A:957:ASN:HB3  | 1:A:970:THR:CG2  | 2.31                     | 0.59              |
| 1:A:870:ALA:HA   | 1:A:873:ILE:HG12 | 1.84                     | 0.59              |
| 1:A:459:MET:O    | 1:A:463:LEU:HG   | 2.03                     | 0.59              |
| 1:A:309:LEU:HD21 | 1:A:342:TYR:CD2  | 2.38                     | 0.59              |
| 3:Y:9:G:H2'      | 3:Y:10:C:C6      | 2.38                     | 0.59              |
| 2:X:1:U:H2'      | 2:X:2:C:H6       | 1.69                     | 0.58              |
| 3:Y:8:C:H2'      | 3:Y:9:G:C8       | 2.38                     | 0.58              |
| 1:A:842:GLU:O    | 1:A:846:VAL:HG23 | 2.04                     | 0.58              |
| 1:A:339:VAL:O    | 1:A:343:ILE:HD12 | 2.04                     | 0.58              |
| 1:A:309:LEU:HD21 | 1:A:342:TYR:CG   | 2.37                     | 0.57              |
| 1:A:778:PHE:HB2  | 1:A:786:LEU:HD21 | 1.86                     | 0.57              |
| 2:X:7:C:H2'      | 2:X:8:G:C8       | 2.39                     | 0.57              |
| 1:A:614:ILE:O    | 1:A:618:ILE:N    | 2.37                     | 0.57              |
| 3:Y:4:C:H2'      | 3:Y:5:A:H8       | 1.70                     | 0.56              |
| 3:Y:6:U:H2'      | 3:Y:7:G:H8       | 1.70                     | 0.56              |
| 1:A:435:LEU:HD12 | 1:A:441:ILE:HD11 | 1.88                     | 0.56              |
| 1:A:619:ARG:HG3  | 1:A:621:ILE:HG22 | 1.86                     | 0.56              |
| 2:X:10:A:O2'     | 2:X:11:U:H5'     | 2.06                     | 0.56              |
| 1:A:865:LYS:HD2  | 1:A:866:PRO:HD2  | 1.87                     | 0.56              |
| 1:A:511:CYS:O    | 1:A:515:ASP:N    | 2.39                     | 0.55              |
| 2:X:7:C:H2'      | 2:X:8:G:H8       | 1.71                     | 0.55              |
| 1:A:806:ARG:HB2  | 1:A:832:LEU:HD12 | 1.88                     | 0.55              |

Continued on next page...

*Continued from previous page...*

| Atom-1           | Atom-2            | Interatomic distance (Å) | Clash overlap (Å) |
|------------------|-------------------|--------------------------|-------------------|
| 3:Y:6:U:H2'      | 3:Y:7:G:C8        | 2.42                     | 0.55              |
| 2:X:4:A:O2'      | 2:X:5:U:H5'       | 2.07                     | 0.55              |
| 1:A:808:GLY:HA2  | 1:A:834:THR:HG22  | 1.88                     | 0.54              |
| 1:A:512:ALA:HB1  | 1:A:877:GLN:HG3   | 1.89                     | 0.54              |
| 1:A:402:PRO:O    | 1:A:406:LYS:HG3   | 2.06                     | 0.54              |
| 1:A:805:ILE:HG22 | 1:A:831:VAL:HB    | 1.88                     | 0.54              |
| 3:Y:5:A:O2'      | 3:Y:6:U:H5'       | 2.08                     | 0.54              |
| 1:A:767:THR:HG21 | 2:X:2:C:OP1       | 2.07                     | 0.54              |
| 3:Y:8:C:H2'      | 3:Y:9:G:H8        | 1.73                     | 0.54              |
| 3:Y:10:C:O2'     | 3:Y:11:A:H5'      | 2.07                     | 0.53              |
| 1:A:962:CYS:N    | 1:A:966:GLN:O     | 2.42                     | 0.53              |
| 1:A:754:LEU:N    | 1:A:787:ILE:O     | 2.42                     | 0.53              |
| 1:A:852:LYS:O    | 1:A:856:LYS:HG2   | 2.09                     | 0.53              |
| 1:A:791:VAL:HG22 | 3:Y:7:G:H5''      | 1.90                     | 0.53              |
| 1:A:472:LEU:HA   | 1:A:475:GLN:HB3   | 1.91                     | 0.53              |
| 1:A:897:ASN:HD22 | 1:A:1007:PRO:HG2  | 1.74                     | 0.52              |
| 1:A:366:LYS:HE2  | 3:Y:8:C:H4'       | 1.91                     | 0.52              |
| 1:A:590:ALA:O    | 1:A:594:GLY:N     | 2.42                     | 0.52              |
| 3:Y:9:G:H2'      | 3:Y:10:C:H6'      | 1.75                     | 0.52              |
| 1:A:777:LYS:HB2  | 1:A:783:ILE:HD12  | 1.92                     | 0.52              |
| 1:A:551:PHE:CE2  | 1:A:620:MET:HB2   | 2.45                     | 0.52              |
| 1:A:387:ARG:NH1  | 1:A:407:SER:OG    | 2.43                     | 0.51              |
| 1:A:723:ILE:HD12 | 1:A:787:ILE:HG12  | 1.92                     | 0.51              |
| 1:A:962:CYS:HB3  | 1:A:966:GLN:N     | 2.25                     | 0.51              |
| 2:X:12:G:H2'     | 2:X:13:A:C8       | 2.46                     | 0.51              |
| 1:A:309:LEU:HD11 | 1:A:342:TYR:CZ    | 2.46                     | 0.51              |
| 2:X:8:G:O2'      | 2:X:9:C:H5'       | 2.10                     | 0.51              |
| 3:Y:7:G:O2'      | 3:Y:8:C:H5'       | 2.10                     | 0.51              |
| 1:A:381:TYR:C    | 1:A:382:LEU:HD12  | 2.32                     | 0.50              |
| 1:A:392:SER:HB2  | 1:A:395:THR:HG23  | 1.94                     | 0.50              |
| 2:X:12:G:H2'     | 2:X:13:A:H8       | 1.77                     | 0.50              |
| 2:X:6:G:O2'      | 2:X:7:C:H5'       | 2.11                     | 0.49              |
| 1:A:747:VAL:CG1  | 1:A:749:VAL:HG23  | 2.41                     | 0.49              |
| 1:A:731:THR:HG22 | 1:A:787:ILE:HG22  | 1.93                     | 0.49              |
| 2:X:2:C:H2'      | 2:X:3:C:C6        | 2.46                     | 0.49              |
| 3:Y:13:G:O2'     | 3:Y:14:G:H5'      | 2.13                     | 0.48              |
| 1:A:337:THR:O    | 1:A:341:VAL:HG23  | 2.13                     | 0.48              |
| 1:A:728:ARG:O    | 1:A:731:THR:OG1   | 2.18                     | 0.48              |
| 1:A:931:MET:HE1  | 1:A:1013:LEU:HD11 | 1.95                     | 0.48              |
| 1:A:806:ARG:HB2  | 1:A:832:LEU:CD1   | 2.43                     | 0.48              |
| 2:X:5:U:O2'      | 2:X:6:G:H5'       | 2.13                     | 0.48              |

*Continued on next page...*

Continued from previous page...

| Atom-1           | Atom-2           | Interatomic distance (Å) | Clash overlap (Å) |
|------------------|------------------|--------------------------|-------------------|
| 1:A:792:ALA:O    | 1:A:796:LEU:N    | 2.47                     | 0.47              |
| 1:A:578:HIS:CD2  | 2:X:15:G:H4'     | 2.49                     | 0.47              |
| 1:A:619:ARG:CG   | 1:A:621:ILE:HG22 | 2.45                     | 0.47              |
| 2:X:2:C:O2'      | 2:X:3:C:H5'      | 2.14                     | 0.47              |
| 1:A:899:ASN:HB2  | 1:A:1008:ILE:CG2 | 2.44                     | 0.47              |
| 1:A:720:ARG:NH2  | 1:A:779:ARG:O    | 2.47                     | 0.47              |
| 1:A:907:CYS:SG   | 1:A:908:LYS:N    | 2.88                     | 0.47              |
| 1:A:681:PHE:HA   | 1:A:684:LYS:HB2  | 1.97                     | 0.46              |
| 1:A:637:LYS:O    | 1:A:641:VAL:HG23 | 2.15                     | 0.46              |
| 3:Y:3:U:H2'      | 3:Y:4:C:H6       | 1.75                     | 0.46              |
| 1:A:789:THR:OG1  | 1:A:791:VAL:HG23 | 2.16                     | 0.46              |
| 1:A:915:CYS:SG   | 1:A:930:ASN:ND2  | 2.84                     | 0.46              |
| 3:Y:14:G:H2'     | 3:Y:15:A:C8      | 2.51                     | 0.46              |
| 1:A:452:GLU:O    | 2:X:9:C:H4'      | 2.17                     | 0.45              |
| 1:A:641:VAL:HG21 | 1:A:965:GLY:HA2  | 1.98                     | 0.45              |
| 1:A:873:ILE:O    | 1:A:877:GLN:HG3  | 2.17                     | 0.45              |
| 1:A:425:LEU:HD22 | 1:A:433:VAL:O    | 2.16                     | 0.44              |
| 1:A:340:ALA:O    | 1:A:344:THR:HG23 | 2.17                     | 0.44              |
| 1:A:820:ARG:NH1  | 1:A:851:GLU:OE1  | 2.43                     | 0.44              |
| 1:A:778:PHE:CG   | 1:A:786:LEU:HD11 | 2.53                     | 0.44              |
| 1:A:309:LEU:HB3  | 1:A:314:MET:HE2  | 1.99                     | 0.44              |
| 1:A:309:LEU:HD11 | 1:A:342:TYR:CE1  | 2.52                     | 0.44              |
| 1:A:750:LYS:O    | 1:A:784:ASN:HB2  | 2.17                     | 0.44              |
| 1:A:973:VAL:HG22 | 1:A:978:ASP:OD1  | 2.18                     | 0.44              |
| 1:A:808:GLY:N    | 1:A:833:VAL:O    | 2.48                     | 0.43              |
| 1:A:929:VAL:HG21 | 1:A:979:LEU:HD22 | 1.99                     | 0.43              |
| 3:Y:14:G:H2'     | 3:Y:15:A:H8      | 1.83                     | 0.43              |
| 1:A:471:ASP:O    | 1:A:475:GLN:CB   | 2.65                     | 0.43              |
| 1:A:549:ASN:O    | 1:A:552:LYS:HB3  | 2.17                     | 0.43              |
| 2:X:9:C:O2'      | 2:X:10:A:H5'     | 2.18                     | 0.43              |
| 1:A:723:ILE:HG13 | 1:A:785:LEU:HD11 | 2.01                     | 0.43              |
| 1:A:504:GLU:O    | 1:A:508:LEU:HD23 | 2.19                     | 0.43              |
| 2:X:6:G:H2'      | 2:X:7:C:C6       | 2.54                     | 0.43              |
| 1:A:870:ALA:O    | 1:A:874:LEU:HG   | 2.18                     | 0.43              |
| 2:X:12:G:O2'     | 2:X:13:A:H5'     | 2.19                     | 0.43              |
| 2:X:13:A:O2'     | 2:X:14:C:H5'     | 2.19                     | 0.43              |
| 1:A:542:ILE:HD11 | 1:A:832:LEU:HD23 | 2.00                     | 0.43              |
| 1:A:929:VAL:HG21 | 1:A:979:LEU:HB3  | 2.01                     | 0.43              |
| 1:A:769:THR:OG1  | 2:X:1:U:OP1      | 2.32                     | 0.43              |
| 1:A:583:ALA:O    | 1:A:602:ALA:HB1  | 2.19                     | 0.42              |
| 1:A:344:THR:HG1  | 1:A:345:LYS:H    | 1.67                     | 0.42              |

Continued on next page...

Continued from previous page...

| Atom-1           | Atom-2           | Interatomic distance (Å) | Clash overlap (Å) |
|------------------|------------------|--------------------------|-------------------|
| 1:A:741:ASN:HD22 | 1:A:742:ALA:N    | 2.17                     | 0.42              |
| 1:A:472:LEU:HD22 | 1:A:479:ALA:N    | 2.35                     | 0.41              |
| 2:X:11:U:O2'     | 2:X:12:G:H5'     | 2.20                     | 0.41              |
| 1:A:642:LEU:HD23 | 1:A:642:LEU:O    | 2.20                     | 0.41              |
| 2:X:6:G:H2'      | 2:X:7:C:H6       | 1.85                     | 0.41              |
| 1:A:804:VAL:O    | 1:A:804:VAL:HG13 | 2.20                     | 0.41              |
| 1:A:709:LEU:O    | 1:A:713:THR:HG23 | 2.20                     | 0.41              |
| 1:A:884:LYS:O    | 1:A:888:VAL:HG23 | 2.21                     | 0.41              |
| 1:A:791:VAL:HG23 | 3:Y:7:G:H5''     | 2.02                     | 0.41              |
| 1:A:767:THR:HG21 | 2:X:2:C:P        | 2.60                     | 0.41              |
| 1:A:349:ASP:O    | 1:A:353:GLN:HG2  | 2.20                     | 0.41              |
| 1:A:722:ILE:HD13 | 1:A:801:CYS:SG   | 2.61                     | 0.40              |
| 1:A:348:LEU:HD23 | 1:A:386:TYR:CD1  | 2.57                     | 0.40              |
| 1:A:750:LYS:H    | 1:A:784:ASN:ND2  | 2.13                     | 0.40              |

There are no symmetry-related clashes.

### 5.3 Torsion angles [i](#)

#### 5.3.1 Protein backbone [i](#)

In the following table, the Percentiles column shows the percent Ramachandran outliers of the chain as a percentile score with respect to all PDB entries followed by that with respect to all EM entries.

The Analysed column shows the number of residues for which the backbone conformation was analysed, and the total number of residues.

| Mol | Chain | Analysed       | Favoured  | Allowed  | Outliers | Percentiles           |
|-----|-------|----------------|-----------|----------|----------|-----------------------|
| 1   | A     | 640/1007 (64%) | 579 (90%) | 61 (10%) | 0        | <b>100</b> <b>100</b> |

There are no Ramachandran outliers to report.

#### 5.3.2 Protein sidechains [i](#)

In the following table, the Percentiles column shows the percent sidechain outliers of the chain as a percentile score with respect to all PDB entries followed by that with respect to all EM entries.

The Analysed column shows the number of residues for which the sidechain conformation was analysed, and the total number of residues.



| Mol | Chain | Analysed      | Rotameric | Outliers | Percentiles |
|-----|-------|---------------|-----------|----------|-------------|
| 1   | A     | 569/900 (63%) | 564 (99%) | 5 (1%)   | 81 91       |

All (5) residues with a non-rotameric sidechain are listed below:

| Mol | Chain | Res | Type |
|-----|-------|-----|------|
| 1   | A     | 451 | LYS  |
| 1   | A     | 534 | LYS  |
| 1   | A     | 606 | ARG  |
| 1   | A     | 741 | ASN  |
| 1   | A     | 990 | ASN  |

Some sidechains can be flipped to improve hydrogen bonding and reduce clashes. All (8) such sidechains are listed below:

| Mol | Chain | Res | Type |
|-----|-------|-----|------|
| 1   | A     | 563 | GLN  |
| 1   | A     | 678 | ASN  |
| 1   | A     | 683 | ASN  |
| 1   | A     | 706 | ASN  |
| 1   | A     | 741 | ASN  |
| 1   | A     | 784 | ASN  |
| 1   | A     | 897 | ASN  |
| 1   | A     | 990 | ASN  |

### 5.3.3 RNA [i](#)

| Mol | Chain | Analysed    | Backbone Outliers | Pucker Outliers |
|-----|-------|-------------|-------------------|-----------------|
| 2   | X     | 14/15 (93%) | 1 (7%)            | 0               |
| 3   | Y     | 14/15 (93%) | 0                 | 0               |
| All | All   | 28/30 (93%) | 1 (3%)            | 0               |

All (1) RNA backbone outliers are listed below:

| Mol | Chain | Res | Type |
|-----|-------|-----|------|
| 2   | X     | 15  | G    |

There are no RNA pucker outliers to report.

## 5.4 Non-standard residues in protein, DNA, RNA chains [i](#)

There are no non-standard protein/DNA/RNA residues in this entry.

## 5.5 Carbohydrates [i](#)

There are no carbohydrates in this entry.

## 5.6 Ligand geometry [i](#)

Of 1 ligands modelled in this entry, 1 is monoatomic - leaving 0 for Mogul analysis.

There are no bond length outliers.

There are no bond angle outliers.

There are no chirality outliers.

There are no torsion outliers.

There are no ring outliers.

No monomer is involved in short contacts.

## 5.7 Other polymers [i](#)

There are no such residues in this entry.

## 5.8 Polymer linkage issues [i](#)

There are no chain breaks in this entry.

CONFIDENTIAL

VALIDATION REPORT



# Full wwPDB/EMDataBank EM Map/Model Validation Report ⓘ

Jul 27, 2018 – 07:51 AM BST

PDB ID : 6H66  
EMDB ID: : 4338  
Title : CryoEM structure of the MDA5-dsRNA filament with 93 degree twist and  
without nucleotide  
Deposited on : 2018-07-26  
Resolution : 4.16 Å(reported)  
Based on PDB ID : 6G1X

This is a Full wwPDB/EMDataBank EM Map/Model Validation Report.

This report is produced by the wwPDB biocuration pipeline after annotation of the structure.

We welcome your comments at [validation@mail.wwpdb.org](mailto:validation@mail.wwpdb.org)

A user guide is available at

<https://www.wwpdb.org/validation/2017/EMValidationReportHelp>

with specific help available everywhere you see the ⓘ symbol.

---

MolProbity : 4.02b-467  
Percentile statistics : 20171227.v01 (using entries in the PDB archive December 27th 2017)  
Ideal geometry (proteins) : Engh & Huber (2001)  
Ideal geometry (DNA, RNA) : Parkinson et. al. (1996)  
Validation Pipeline (wwPDB-VP) : rb-20031172

# 1 Overall quality at a glance i

The following experimental techniques were used to determine the structure:  
*ELECTRON MICROSCOPY*

The reported resolution of this entry is 4.16 Å.

Percentile scores (ranging between 0-100) for global validation metrics of the entry are shown in the following graphic. The table shows the number of entries on which the scores are based.

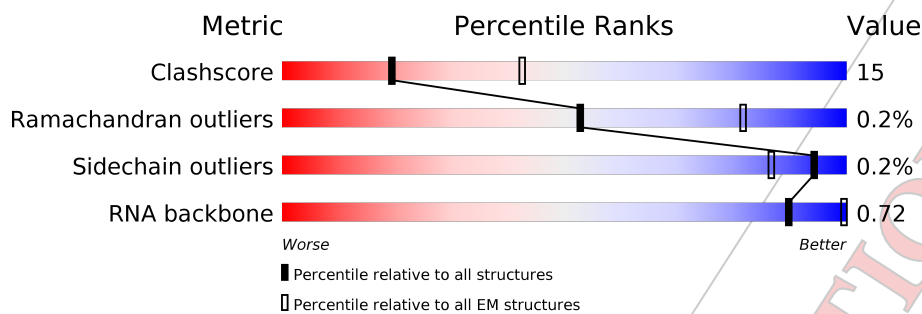

| Metric                | Whole archive (#Entries) | EM structures (#Entries) |
|-----------------------|--------------------------|--------------------------|
| Clashscore            | 136327                   | 1886                     |
| Ramachandran outliers | 132723                   | 1663                     |
| Sidechain outliers    | 132532                   | 1531                     |
| RNA backbone          | 3747                     | 458                      |

The table below summarises the geometric issues observed across the polymeric chains. The red, orange, yellow and green segments on the bar indicate the fraction of residues that contain outliers for  $\geq 3$ , 2, 1 and 0 types of geometric quality criteria. A grey segment represents the fraction of residues that are not modelled. The numeric value for each fraction is indicated below the corresponding segment, with a dot representing fractions  $\leq 5\%$

| Mol | Chain | Length | Quality of chain                      |
|-----|-------|--------|---------------------------------------|
| 1   | A     | 1007   | 48% (green), 18% (yellow), 34% (grey) |
| 2   | X     | 15     | 93% (yellow), 7% (orange)             |
| 3   | Y     | 15     | 7% (green), 93% (yellow)              |

## 2 Entry composition i

There are 4 unique types of molecules in this entry. The entry contains 10017 atoms, of which 4120 are hydrogens and 0 are deuteriums.

In the tables below, the AltConf column contains the number of residues with at least one atom in alternate conformation and the Trace column contains the number of residues modelled with at most 2 atoms.

- Molecule 1 is a protein called Interferon-induced helicase C domain-containing protein 1.

| Mol | Chain | Residues | Atoms |      |      |     |     |    | AltConf | Trace |
|-----|-------|----------|-------|------|------|-----|-----|----|---------|-------|
|     |       |          | Total | C    | H    | N   | O   | S  |         |       |
| 1   | A     | 667      | 9377  | 3339 | 4120 | 920 | 965 | 33 | 0       | 0     |

There are 18 discrepancies between the modelled and reference sequences:

| Chain | Residue | Modelled | Actual | Comment  | Reference  |
|-------|---------|----------|--------|----------|------------|
| A     | ?       | -        | ASP    | deletion | UNP Q8R5F7 |
| A     | ?       | -        | LYS    | deletion | UNP Q8R5F7 |
| A     | ?       | -        | SER    | deletion | UNP Q8R5F7 |
| A     | ?       | -        | ASP    | deletion | UNP Q8R5F7 |
| A     | ?       | -        | ASP    | deletion | UNP Q8R5F7 |
| A     | ?       | -        | GLU    | deletion | UNP Q8R5F7 |
| A     | ?       | -        | ALA    | deletion | UNP Q8R5F7 |
| A     | ?       | -        | SER    | deletion | UNP Q8R5F7 |
| A     | ?       | -        | SER    | deletion | UNP Q8R5F7 |
| A     | ?       | -        | CYS    | deletion | UNP Q8R5F7 |
| A     | ?       | -        | ASN    | deletion | UNP Q8R5F7 |
| A     | ?       | -        | ASP    | deletion | UNP Q8R5F7 |
| A     | ?       | -        | GLN    | deletion | UNP Q8R5F7 |
| A     | ?       | -        | LEU    | deletion | UNP Q8R5F7 |
| A     | ?       | -        | LYS    | deletion | UNP Q8R5F7 |
| A     | ?       | -        | GLY    | deletion | UNP Q8R5F7 |
| A     | ?       | -        | ASP    | deletion | UNP Q8R5F7 |
| A     | ?       | -        | VAL    | deletion | UNP Q8R5F7 |

- Molecule 2 is a RNA chain called RNA (5'-R(P\*UP\*CP\*CP\*AP\*UP\*GP\*CP\*GP\*CP\*AP\*UP\*GP\*AP\*CP\*G)-3').

| Mol | Chain | Residues | Atoms |     |    |     |    | AltConf | Trace |
|-----|-------|----------|-------|-----|----|-----|----|---------|-------|
|     |       |          | Total | C   | N  | O   | P  |         |       |
| 2   | X     | 15       | 318   | 142 | 56 | 105 | 15 | 0       | 0     |

- Molecule 3 is a RNA chain called RNA (5'-R(P\*CP\*GP\*UP\*CP\*AP\*UP\*GP\*CP\*GP\*CP

\*AP\*UP\*GP\*GP\*A)-3').

| Mol | Chain | Residues | Atoms |     |    |     |    | AltConf | Trace |
|-----|-------|----------|-------|-----|----|-----|----|---------|-------|
|     |       |          | Total | C   | N  | O   | P  |         |       |
| 3   | Y     | 15       | 321   | 143 | 58 | 105 | 15 | 0       | 0     |

- Molecule 4 is ZINC ION (three-letter code: ZN) (formula: Zn).

| Mol | Chain | Residues | Atoms |    | AltConf |
|-----|-------|----------|-------|----|---------|
|     |       |          | Total | Zn |         |
| 4   | A     | 1        | 1     | 1  | 0       |

CONFIDENTIAL VALIDATION REPORT



U1  
C2  
C3  
A4  
U5  
G6  
C7  
G8  
C9  
A10  
U11  
G12  
A13  
C14  
G15

- Molecule 3: RNA (5'-R(P\*CP\*GP\*UP\*CP\*AP\*UP\*GP\*CP\*GP\*CP\*AP\*UP\*GP\*GP\*A)-3'  
)

Chain Y:  7% 93%

C1  
G2  
U3  
C4  
A5  
U6  
C7  
G8  
C9  
A10  
U11  
G12  
A13  
C14  
A15

CONFIDENTIAL VALIDATION REPORT



## 4 Experimental information i

| Property                           | Value                                                | Source    |
|------------------------------------|------------------------------------------------------|-----------|
| Reconstruction method              | HELICAL                                              | Depositor |
| Imposed symmetry                   | HELICAL, twist=93.0596°, rise=44.366 Å, axial sym=C1 | Depositor |
| Number of segments used            | 19111                                                | Depositor |
| Resolution determination method    | FSC 0.143 CUT-OFF                                    | Depositor |
| CTF correction method              | PHASE FLIPPING AND AMPLITUDE CORRECTION              | Depositor |
| Microscope                         | FEI TITAN KRIOS                                      | Depositor |
| Voltage (kV)                       | 300                                                  | Depositor |
| Electron dose ( $e^-/\text{Å}^2$ ) | 27.0                                                 | Depositor |
| Minimum defocus (nm)               | -1800                                                | Depositor |
| Maximum defocus (nm)               | -2700                                                | Depositor |
| Magnification                      | 75000                                                | Depositor |
| Image detector                     | FEI FALCON III (4k x 4k)                             | Depositor |

CONFIDENTIAL

VALIDATION REPORT

## 5 Model quality i

### 5.1 Standard geometry i

Bond lengths and bond angles in the following residue types are not validated in this section:  
ZN

The Z score for a bond length (or angle) is the number of standard deviations the observed value is removed from the expected value. A bond length (or angle) with  $|Z| > 5$  is considered an outlier worth inspection. RMSZ is the root-mean-square of all Z scores of the bond lengths (or angles).

| Mol | Chain | Bond lengths |         | Bond angles |               |
|-----|-------|--------------|---------|-------------|---------------|
|     |       | RMSZ         | # Z  >2 | RMSZ        | # Z  >2       |
| 1   | A     | 0.42         | 0/5338  | 0.56        | 2/7184 (0.0%) |
| 2   | X     | 0.66         | 0/354   | 0.93        | 0/549         |
| 3   | Y     | 0.65         | 0/358   | 0.90        | 0/556         |
| All | All   | 0.45         | 0/6050  | 0.62        | 2/8289 (0.0%) |

Chiral center outliers are detected by calculating the chiral volume of a chiral center and verifying if the center is modelled as a planar moiety or with the opposite hand. A planarity outlier is detected by checking planarity of atoms in a peptide group, atoms in a mainchain group or atoms of a sidechain that are expected to be planar.

| Mol | Chain | #Chirality outliers | #Planarity outliers |
|-----|-------|---------------------|---------------------|
| 1   | A     | 0                   | 1                   |

There are no bond length outliers.

All (2) bond angle outliers are listed below:

| Mol | Chain | Res | Type | Atoms  | Z    | Observed(°) | Ideal(°) |
|-----|-------|-----|------|--------|------|-------------|----------|
| 1   | A     | 497 | ALA  | C-N-CA | 6.51 | 137.97      | 121.70   |
| 1   | A     | 399 | ILE  | C-N-CA | 6.05 | 136.83      | 121.70   |

There are no chirality outliers.

All (1) planarity outliers are listed below:

| Mol | Chain | Res | Type | Group   |
|-----|-------|-----|------|---------|
| 1   | A     | 477 | LYS  | Peptide |

## 5.2 Too-close contacts [\(i\)](#)

In the following table, the Non-H and H(model) columns list the number of non-hydrogen atoms and hydrogen atoms in the chain respectively. The H(added) column lists the number of hydrogen atoms added and optimized by MolProbity. The Clashes column lists the number of clashes within the asymmetric unit, whereas Symm-Clashes lists symmetry related clashes.

| Mol | Chain | Non-H | H(model) | H(added) | Clashes | Symm-Clashes |
|-----|-------|-------|----------|----------|---------|--------------|
| 1   | A     | 5257  | 4120     | 5329     | 130     | 0            |
| 2   | X     | 318   | 0        | 163      | 25      | 0            |
| 3   | Y     | 321   | 0        | 163      | 26      | 0            |
| 4   | A     | 1     | 0        | 0        | 0       | 0            |
| All | All   | 5897  | 4120     | 5655     | 175     | 0            |

The all-atom clashscore is defined as the number of clashes found per 1000 atoms (including hydrogen atoms). The all-atom clashscore for this structure is 15.

All (175) close contacts within the same asymmetric unit are listed below, sorted by their clash magnitude.

| Atom-1           | Atom-2           | Interatomic distance (Å) | Clash overlap (Å) |
|------------------|------------------|--------------------------|-------------------|
| 1:A:749:VAL:HA   | 1:A:784:ASN:HD22 | 1.40                     | 0.85              |
| 3:Y:1:C:H2'      | 3:Y:2:G:H8       | 1.49                     | 0.77              |
| 1:A:599:ARG:NH1  | 1:A:909:ASN:OD1  | 2.18                     | 0.77              |
| 1:A:374:PHE:O    | 1:A:379:ASN:ND2  | 2.18                     | 0.77              |
| 1:A:751:ALA:HB2  | 1:A:785:LEU:HB3  | 1.69                     | 0.74              |
| 1:A:457:ASN:OD1  | 1:A:460:ARG:NH2  | 2.22                     | 0.73              |
| 1:A:715:SER:OG   | 1:A:717:GLU:O    | 2.07                     | 0.72              |
| 2:X:3:C:H2'      | 2:X:4:A:H8       | 1.55                     | 0.71              |
| 2:X:5:U:H2'      | 2:X:6:G:H8       | 1.56                     | 0.70              |
| 1:A:372:GLN:OE1  | 1:A:375:ARG:NH2  | 2.25                     | 0.70              |
| 1:A:924:GLU:OE2  | 1:A:974:HIS:NE2  | 2.25                     | 0.70              |
| 1:A:379:ASN:O    | 1:A:383:LYS:N    | 2.26                     | 0.68              |
| 2:X:5:U:H2'      | 2:X:6:G:C8       | 2.28                     | 0.68              |
| 1:A:339:VAL:O    | 1:A:343:ILE:HD12 | 1.94                     | 0.68              |
| 1:A:927:HIS:NE2  | 2:X:5:U:O2'      | 2.26                     | 0.68              |
| 3:Y:4:C:H2'      | 3:Y:5:A:H8       | 1.60                     | 0.67              |
| 3:Y:4:C:H2'      | 3:Y:5:A:C8       | 2.30                     | 0.67              |
| 2:X:9:C:H2'      | 2:X:10:A:H8      | 1.61                     | 0.66              |
| 2:X:9:C:H2'      | 2:X:10:A:C8      | 2.31                     | 0.65              |
| 3:Y:1:C:H2'      | 3:Y:2:G:C8       | 2.31                     | 0.65              |
| 1:A:791:VAL:HG23 | 3:Y:7:G:H5''     | 1.79                     | 0.65              |
| 2:X:3:C:H2'      | 2:X:4:A:C8       | 2.31                     | 0.65              |
| 1:A:832:LEU:HD21 | 1:A:840:VAL:HG12 | 1.80                     | 0.64              |

*Continued on next page...*

Continued from previous page...

| Atom-1           | Atom-2            | Interatomic distance (Å) | Clash overlap (Å) |
|------------------|-------------------|--------------------------|-------------------|
| 1:A:341:VAL:O    | 1:A:344:THR:OG1   | 2.11                     | 0.64              |
| 1:A:425:LEU:HB2  | 1:A:433:VAL:H     | 1.63                     | 0.63              |
| 1:A:349:ASP:O    | 1:A:353:GLN:HG2   | 1.97                     | 0.63              |
| 1:A:915:CYS:SG   | 1:A:930:ASN:ND2   | 2.71                     | 0.63              |
| 1:A:351:LYS:O    | 1:A:355:SER:N     | 2.32                     | 0.62              |
| 1:A:617:THR:O    | 1:A:807:TYR:OH    | 2.12                     | 0.62              |
| 1:A:962:CYS:HB3  | 1:A:966:GLN:H     | 1.62                     | 0.62              |
| 1:A:471:ASP:O    | 1:A:475:GLN:N     | 2.32                     | 0.62              |
| 1:A:614:ILE:O    | 1:A:618:ILE:N     | 2.33                     | 0.61              |
| 1:A:1018:TYR:O   | 1:A:1020:LEU:HD12 | 2.01                     | 0.60              |
| 1:A:798:ILE:HB   | 1:A:822:ARG:HD2   | 1.82                     | 0.60              |
| 3:Y:8:C:H2'      | 3:Y:9:G:C8        | 2.37                     | 0.60              |
| 1:A:962:CYS:SG   | 1:A:963:LYS:N     | 2.75                     | 0.60              |
| 3:Y:14:G:H2'     | 3:Y:15:A:H8       | 1.66                     | 0.60              |
| 1:A:761:SER:OG   | 3:Y:6:U:OP2       | 2.19                     | 0.60              |
| 1:A:323:GLY:O    | 1:A:484:GLN:NE2   | 2.35                     | 0.60              |
| 1:A:974:HIS:HB3  | 1:A:979:LEU:HD12  | 1.84                     | 0.59              |
| 3:Y:14:G:H2'     | 3:Y:15:A:C8       | 2.37                     | 0.59              |
| 1:A:622:ASP:O    | 1:A:625:SER:OG    | 2.19                     | 0.59              |
| 3:Y:3:U:H2'      | 3:Y:4:C:C6        | 2.38                     | 0.59              |
| 2:X:11:U:H2'     | 2:X:12:G:H8       | 1.67                     | 0.58              |
| 1:A:357:SER:O    | 1:A:439:SER:OG    | 2.19                     | 0.58              |
| 3:Y:10:C:O2'     | 3:Y:11:A:H5'      | 2.03                     | 0.57              |
| 3:Y:8:C:H2'      | 3:Y:9:G:H8        | 1.69                     | 0.57              |
| 2:X:11:U:H2'     | 2:X:12:G:C8       | 2.38                     | 0.57              |
| 1:A:595:ASN:ND2  | 1:A:598:ASP:OD2   | 2.38                     | 0.57              |
| 1:A:852:LYS:O    | 1:A:856:LYS:HG2   | 2.06                     | 0.56              |
| 1:A:509:ASN:O    | 1:A:513:ASN:ND2   | 2.38                     | 0.56              |
| 1:A:923:ILE:HD12 | 1:A:924:GLU:HG2   | 1.87                     | 0.56              |
| 1:A:870:ALA:HA   | 1:A:873:ILE:HG12  | 1.87                     | 0.56              |
| 3:Y:7:G:O2'      | 3:Y:8:C:H5'       | 2.06                     | 0.56              |
| 1:A:865:LYS:HD2  | 1:A:866:PRO:HD2   | 1.87                     | 0.55              |
| 3:Y:3:U:H2'      | 3:Y:4:C:H6        | 1.71                     | 0.55              |
| 3:Y:5:A:O2'      | 3:Y:6:U:H5'       | 2.05                     | 0.55              |
| 1:A:883:GLU:OE2  | 1:A:887:LYS:HE2   | 2.06                     | 0.55              |
| 1:A:842:GLU:O    | 1:A:846:VAL:HG23  | 2.08                     | 0.54              |
| 2:X:10:A:O2'     | 2:X:11:U:H5'      | 2.07                     | 0.54              |
| 1:A:588:LYS:O    | 1:A:592:LYS:N     | 2.40                     | 0.53              |
| 1:A:512:ALA:HB1  | 1:A:877:GLN:HG3   | 1.88                     | 0.53              |
| 1:A:399:ILE:HD11 | 1:A:403:GLU:CB    | 2.39                     | 0.53              |
| 1:A:566:CYS:HB2  | 1:A:568:LYS:HG2   | 1.91                     | 0.53              |

Continued on next page...

Continued from previous page...

| Atom-1            | Atom-2            | Interatomic distance (Å) | Clash overlap (Å) |
|-------------------|-------------------|--------------------------|-------------------|
| 2:X:4:A:O2'       | 2:X:5:U:H5'       | 2.09                     | 0.53              |
| 1:A:806:ARG:HD2   | 1:A:809:LEU:HD23  | 1.92                     | 0.52              |
| 1:A:962:CYS:SG    | 1:A:964:CYS:N     | 2.77                     | 0.52              |
| 2:X:7:C:H2'       | 2:X:8:G:C8        | 2.45                     | 0.52              |
| 1:A:751:ALA:CB    | 1:A:785:LEU:HB3   | 2.37                     | 0.52              |
| 1:A:962:CYS:HB3   | 1:A:966:GLN:N     | 2.24                     | 0.52              |
| 2:X:8:G:O2'       | 2:X:9:C:H5'       | 2.10                     | 0.52              |
| 1:A:464:LYS:HE2   | 1:A:468:ARG:HH21  | 1.75                     | 0.52              |
| 1:A:749:VAL:HA    | 1:A:784:ASN:ND2   | 2.17                     | 0.51              |
| 1:A:712:PHE:HE2   | 1:A:747:VAL:HG22  | 1.74                     | 0.51              |
| 1:A:806:ARG:HG3   | 1:A:830:TYR:OH    | 2.10                     | 0.51              |
| 1:A:558:ILE:O     | 1:A:561:SER:OG    | 2.23                     | 0.51              |
| 1:A:590:ALA:HB3   | 1:A:599:ARG:HB3   | 1.92                     | 0.51              |
| 1:A:897:ASN:HB2   | 1:A:1007:PRO:HG2  | 1.92                     | 0.51              |
| 1:A:962:CYS:N     | 1:A:966:GLN:O     | 2.41                     | 0.51              |
| 2:X:12:G:H2'      | 2:X:13:A:H8       | 1.76                     | 0.51              |
| 2:X:6:G:O2'       | 2:X:7:C:H5'       | 2.11                     | 0.50              |
| 1:A:511:CYS:O     | 1:A:515:ASP:N     | 2.44                     | 0.50              |
| 2:X:7:C:H2'       | 2:X:8:G:H8        | 1.76                     | 0.50              |
| 1:A:566:CYS:CB    | 1:A:568:LYS:HG2   | 2.42                     | 0.50              |
| 1:A:640:ALA:HA    | 1:A:643:ASN:OD1   | 2.11                     | 0.50              |
| 1:A:624:TYR:CE2   | 1:A:688:LYS:HD2   | 2.47                     | 0.49              |
| 1:A:791:VAL:CG2   | 3:Y:7:G:H5"       | 2.41                     | 0.49              |
| 1:A:731:THR:HG22  | 1:A:787:ILE:HG22  | 1.94                     | 0.49              |
| 1:A:589:LYS:HD3   | 1:A:592:LYS:HD2   | 1.94                     | 0.49              |
| 3:Y:3:U:O2'       | 3:Y:4:C:H5'       | 2.13                     | 0.49              |
| 2:X:13:A:O2'      | 2:X:14:C:H5'      | 2.13                     | 0.48              |
| 1:A:974:HIS:CE1   | 1:A:975:LYS:HG2   | 2.48                     | 0.48              |
| 1:A:402:PRO:O     | 1:A:406:LYS:HG3   | 2.14                     | 0.48              |
| 1:A:422:LEU:O     | 1:A:425:LEU:HB3   | 2.14                     | 0.48              |
| 3:Y:6:U:H2'       | 3:Y:7:G:H8        | 1.78                     | 0.48              |
| 1:A:869:TYR:O     | 1:A:873:ILE:HG23  | 2.14                     | 0.48              |
| 1:A:566:CYS:HB3   | 1:A:568:LYS:HE2   | 1.96                     | 0.47              |
| 2:X:1:U:H2'       | 2:X:2:C:C6        | 2.49                     | 0.47              |
| 1:A:316:VAL:HG23  | 1:A:520:LYS:O     | 2.14                     | 0.47              |
| 1:A:425:LEU:O     | 1:A:428:GLY:N     | 2.47                     | 0.47              |
| 1:A:425:LEU:HD22  | 1:A:433:VAL:O     | 2.15                     | 0.47              |
| 1:A:328:ILE:N     | 1:A:487:GLY:O     | 2.46                     | 0.47              |
| 2:X:2:C:H2'       | 2:X:3:C:H6        | 1.79                     | 0.47              |
| 1:A:905:LEU:C     | 1:A:906:LEU:HD12  | 2.35                     | 0.47              |
| 1:A:1006:LEU:HD13 | 1:A:1008:ILE:HG13 | 1.96                     | 0.47              |

Continued on next page...

Continued from previous page...

| Atom-1            | Atom-2            | Interatomic distance (Å) | Clash overlap (Å) |
|-------------------|-------------------|--------------------------|-------------------|
| 1:A:712:PHE:CE2   | 1:A:747:VAL:HG22  | 2.50                     | 0.47              |
| 1:A:365:ASN:OD1   | 1:A:366:LYS:N     | 2.48                     | 0.47              |
| 1:A:1015:TYR:O    | 1:A:1018:TYR:N    | 2.48                     | 0.46              |
| 1:A:382:LEU:HB2   | 1:A:388:ILE:HD11  | 1.97                     | 0.46              |
| 2:X:12:G:H2'      | 2:X:13:A:C8       | 2.50                     | 0.46              |
| 3:Y:9:G:H2'       | 3:Y:10:C:H6       | 1.80                     | 0.46              |
| 1:A:309:LEU:HD11  | 1:A:342:TYR:CD1   | 2.50                     | 0.46              |
| 1:A:472:LEU:HA    | 1:A:475:GLN:HB3   | 1.97                     | 0.46              |
| 1:A:549:ASN:HB2   | 1:A:550:PRO:HD3   | 1.98                     | 0.46              |
| 1:A:885:LYS:O     | 1:A:889:LYS:HG2   | 2.16                     | 0.46              |
| 1:A:460:ARG:HE    | 1:A:884:LYS:HD2   | 1.81                     | 0.46              |
| 1:A:1006:LEU:HD13 | 1:A:1008:ILE:CG1  | 2.46                     | 0.46              |
| 1:A:637:LYS:O     | 1:A:641:VAL:HG23  | 2.15                     | 0.46              |
| 1:A:459:MET:O     | 1:A:463:LEU:HG    | 2.16                     | 0.46              |
| 1:A:476:ASN:HB2   | 1:A:478:PRO:HD2   | 1.97                     | 0.46              |
| 1:A:716:GLU:O     | 1:A:717:GLU:HB2   | 2.15                     | 0.46              |
| 1:A:916:SER:OG    | 1:A:917:GLY:N     | 2.48                     | 0.45              |
| 2:X:12:G:O2'      | 2:X:13:A:H5'      | 2.16                     | 0.45              |
| 3:Y:2:G:O2'       | 3:Y:3:U:H5'       | 2.16                     | 0.45              |
| 3:Y:6:U:H2'       | 3:Y:7:G:C8        | 2.52                     | 0.45              |
| 3:Y:9:G:O2'       | 3:Y:10:C:H5'      | 2.17                     | 0.45              |
| 1:A:674:GLU:O     | 1:A:678:ASN:ND2   | 2.50                     | 0.45              |
| 1:A:563:GLN:O     | 1:A:567:GLN:N     | 2.50                     | 0.45              |
| 1:A:923:ILE:CD1   | 1:A:924:GLU:HG2   | 2.47                     | 0.45              |
| 1:A:619:ARG:HG3   | 1:A:621:ILE:HG22  | 1.99                     | 0.45              |
| 2:X:2:C:O2'       | 2:X:3:C:H5'       | 2.17                     | 0.44              |
| 1:A:974:HIS:ND1   | 1:A:975:LYS:HG2   | 2.32                     | 0.44              |
| 1:A:378:PHE:CD2   | 1:A:412:ILE:HD11  | 2.53                     | 0.44              |
| 1:A:589:LYS:HA    | 1:A:592:LYS:HB2   | 1.98                     | 0.44              |
| 2:X:1:U:H2'       | 2:X:2:C:H6        | 1.83                     | 0.44              |
| 1:A:702:ILE:HG12  | 1:A:705:ARG:HH21  | 1.83                     | 0.43              |
| 3:Y:13:G:O2'      | 3:Y:14:G:H5'      | 2.17                     | 0.43              |
| 3:Y:4:C:O2'       | 3:Y:5:A:H5'       | 2.17                     | 0.43              |
| 1:A:973:VAL:HG22  | 1:A:978:ASP:OD1   | 2.17                     | 0.43              |
| 1:A:972:MET:O     | 1:A:979:LEU:N     | 2.51                     | 0.43              |
| 1:A:568:LYS:HB3   | 1:A:582:TRP:HH2   | 1.84                     | 0.43              |
| 1:A:903:ILE:HD12  | 1:A:904:THR:CA    | 2.48                     | 0.43              |
| 1:A:870:ALA:O     | 1:A:874:LEU:HG    | 2.19                     | 0.43              |
| 1:A:588:LYS:O     | 1:A:592:LYS:HG3   | 2.19                     | 0.43              |
| 1:A:1018:TYR:CE2  | 1:A:1020:LEU:HD11 | 2.54                     | 0.43              |
| 1:A:472:LEU:O     | 1:A:477:LYS:N     | 2.35                     | 0.43              |

Continued on next page...

Continued from previous page...

| Atom-1           | Atom-2            | Interatomic distance (Å) | Clash overlap (Å) |
|------------------|-------------------|--------------------------|-------------------|
| 2:X:3:C:O2'      | 2:X:4:A:H5'       | 2.19                     | 0.43              |
| 1:A:898:ASP:HA   | 1:A:1008:ILE:HA   | 2.02                     | 0.42              |
| 1:A:612:LEU:O    | 1:A:615:ASN:N     | 2.52                     | 0.42              |
| 3:Y:9:G:H2'      | 3:Y:10:C:C6       | 2.54                     | 0.42              |
| 1:A:541:VAL:HB   | 1:A:831:VAL:HG13  | 2.01                     | 0.42              |
| 1:A:578:HIS:CD2  | 2:X:15:G:H4'      | 2.55                     | 0.42              |
| 1:A:642:LEU:HD23 | 1:A:642:LEU:O     | 2.20                     | 0.42              |
| 1:A:777:LYS:HB2  | 1:A:783:ILE:HD12  | 2.00                     | 0.42              |
| 1:A:754:LEU:N    | 1:A:787:ILE:O     | 2.53                     | 0.42              |
| 1:A:884:LYS:O    | 1:A:888:VAL:HG23  | 2.19                     | 0.42              |
| 1:A:619:ARG:CG   | 1:A:621:ILE:HG22  | 2.49                     | 0.42              |
| 1:A:931:MET:CE   | 1:A:1013:LEU:HD11 | 2.49                     | 0.42              |
| 1:A:683:ASN:O    | 1:A:686:MET:HG2   | 2.19                     | 0.41              |
| 1:A:590:ALA:HB1  | 1:A:595:ASN:OD1   | 2.20                     | 0.41              |
| 1:A:899:ASN:H    | 1:A:1008:ILE:HG22 | 1.85                     | 0.41              |
| 1:A:875:GLU:O    | 1:A:879:GLN:HG3   | 2.20                     | 0.41              |
| 1:A:521:THR:HG22 | 1:A:522:VAL:N     | 2.35                     | 0.41              |
| 1:A:713:THR:O    | 1:A:716:GLU:HG2   | 2.20                     | 0.41              |
| 1:A:975:LYS:HE2  | 1:A:975:LYS:HA    | 2.02                     | 0.41              |
| 1:A:1016:SER:HA  | 1:A:1019:CYS:SG   | 2.61                     | 0.41              |
| 1:A:327:ILE:HG22 | 1:A:328:ILE:N     | 2.36                     | 0.40              |
| 1:A:344:THR:O    | 1:A:348:LEU:HD13  | 2.21                     | 0.40              |
| 1:A:974:HIS:HB3  | 1:A:979:LEU:CD1   | 2.50                     | 0.40              |
| 1:A:791:VAL:HG22 | 3:Y:7:G:O3'       | 2.21                     | 0.40              |
| 1:A:459:MET:O    | 1:A:463:LEU:N     | 2.48                     | 0.40              |
| 1:A:460:ARG:HA   | 1:A:463:LEU:HD12  | 2.03                     | 0.40              |
| 1:A:402:PRO:HG2  | 1:A:431:ASP:HB3   | 2.03                     | 0.40              |
| 1:A:403:GLU:O    | 1:A:407:SER:N     | 2.54                     | 0.40              |
| 1:A:876:LEU:HD23 | 1:A:876:LEU:HA    | 1.86                     | 0.40              |

There are no symmetry-related clashes.

## 5.3 Torsion angles [i](#)

### 5.3.1 Protein backbone [i](#)

In the following table, the Percentiles column shows the percent Ramachandran outliers of the chain as a percentile score with respect to all PDB entries followed by that with respect to all EM entries.

The Analysed column shows the number of residues for which the backbone conformation was analysed, and the total number of residues.

| Mol | Chain | Analysed       | Favoured  | Allowed  | Outliers | Percentiles |
|-----|-------|----------------|-----------|----------|----------|-------------|
| 1   | A     | 651/1007 (65%) | 582 (89%) | 68 (10%) | 1 (0%)   | 49 83       |

All (1) Ramachandran outliers are listed below:

| Mol | Chain | Res | Type |
|-----|-------|-----|------|
| 1   | A     | 432 | GLY  |

### 5.3.2 Protein sidechains [i](#)

In the following table, the Percentiles column shows the percent sidechain outliers of the chain as a percentile score with respect to all PDB entries followed by that with respect to all EM entries.

The Analysed column shows the number of residues for which the sidechain conformation was analysed, and the total number of residues.

| Mol | Chain | Analysed      | Rotameric  | Outliers | Percentiles |
|-----|-------|---------------|------------|----------|-------------|
| 1   | A     | 573/900 (64%) | 572 (100%) | 1 (0%)   | 94 96       |

All (1) residues with a non-rotameric sidechain are listed below:

| Mol | Chain | Res | Type |
|-----|-------|-----|------|
| 1   | A     | 451 | LYS  |

Some sidechains can be flipped to improve hydrogen bonding and reduce clashes. All (1) such sidechains are listed below:

| Mol | Chain | Res | Type |
|-----|-------|-----|------|
| 1   | A     | 784 | ASN  |

### 5.3.3 RNA [i](#)

| Mol | Chain | Analysed    | Backbone Outliers | Pucker Outliers |
|-----|-------|-------------|-------------------|-----------------|
| 2   | X     | 14/15 (93%) | 1 (7%)            | 0               |
| 3   | Y     | 14/15 (93%) | 0                 | 0               |
| All | All   | 28/30 (93%) | 1 (3%)            | 0               |

All (1) RNA backbone outliers are listed below:

| Mol | Chain | Res | Type |
|-----|-------|-----|------|
| 2   | X     | 15  | G    |



There are no RNA pucker outliers to report.

#### 5.4 Non-standard residues in protein, DNA, RNA chains [i](#)

There are no non-standard protein/DNA/RNA residues in this entry.

#### 5.5 Carbohydrates [i](#)

There are no carbohydrates in this entry.

#### 5.6 Ligand geometry [i](#)

Of 1 ligands modelled in this entry, 1 is monoatomic - leaving 0 for Mogul analysis.

There are no bond length outliers.

There are no bond angle outliers.

There are no chirality outliers.

There are no torsion outliers.

There are no ring outliers.

No monomer is involved in short contacts.

#### 5.7 Other polymers [i](#)

There are no such residues in this entry.

#### 5.8 Polymer linkage issues [i](#)

There are no chain breaks in this entry.
